# Supplementary material
Source: PubMed Central journal article supplement (PMC6993177)
Supplement: NIHMS1066519-supplement-suppl.pdf [file NIHMS1066519-supplement-suppl.pdf]

# Supporting Online Material for

## **Genetic Restoration of the Florida Panther**

Warren E. Johnson,\* David P. Onorato,\* Melody E. Roelke, E. Darrell Land, Mark Cunningham, Chris Belden, Roy McBride, Deborah Jansen, Mark Lotz, David Shindle, JoGayle Howard, David E. Wildt, Linda M. Penfold, Jeffrey A. Hostetler, Madan K. Oli, Stephen J. O'Brien\*

\*To whom correspondence should be addressed. E-mail: obrien@nih.gov (S.J.O.); johnsonw@ncifcrf.gov (W.E.J.); Dave.Onorato@MyFWC.com (D.P.O.)

Published 24 September 2010, *Science* **329**, 1641 (2010)  
DOI: 10.1126/science.1192891

### **This PDF file includes:**

Materials and Methods  
Figs. S1 to S5  
Tables S1 to S6  
References

## Supplemental Materials and Methods

### Field data and analyses

Field-research methodology, which has been ongoing starting in 1981, is described in numerous publications (*SI-4*). Briefly, adult and juvenile Florida panthers were captured using trained hounds and houndsmen (supplied by Livestock Protection Company, Alpine, Texas), chemically immobilized, and fitted with radio-collars. Vital signs (temperature, heart rate, respiration rate, and capillary refill time) and depth of anesthesia were monitored and recorded and all animals were given a physical examination to assess general health and physical condition. Pumas >4 months old were vaccinated subcutaneously against feline viral rhinotracheitis, feline calicivirus, feline panleukopenia virus (Fel-O-Vax PCT [FDAH]), and rabies (Rabvac™ 3 [FDAH])(initiated in 1985). Beginning June 2003, captive and free-ranging pumas also were vaccinated against FeLV (Fel-O-Vax Lv-K [FDAH] or Fevaxyn FeLV, Schering-Plough Animal Health Corporation, Omaha, Nebraska, USA, and rabies (Rabvac™ 3 [FDAH]). Captured panthers were dewormed with ivermectin (0.1 mg/kg, Ivomec®, Merial Limited, Iselin, New Jersey) and praziquantel (3.75 mg/kg, CestaJect™, Phoenix Pharmaceutical, Inc., St. Joseph, Missouri) and treated with Penicillin G procaine/benzathine (USVet®, Hanford Pharmaceuticals, Syracuse, New York). Panthers were implanted with a subcutaneous transponder identification chip (Trovan®, Douglas, United Kingdom), ear-tattooed, measured, and weighed. Neonatal kittens <6 weeks-of age were handled according to (*SI*) and marked with a subcutaneous (SQ) transponder identification chip.

All recovered Florida panther carcasses were necropsied by board-certified pathologists at the University of Florida Veterinary Medical Teaching Hospital (VMTH, Gainesville, Florida), Disney's Animal Kingdom (Celebration, Florida) or by the FWC Panther Section veterinarian at the Wildlife Research Laboratory (WRL; Gainesville, Florida).

Instrumented animals were monitored approximately every other day (Monday, Wednesday, Friday) from fixed-wing aircraft. Locations were plotted on 7.5-minute USGS topographic maps and recorded as Universal Transverse Mercator coordinates. Mating and denning behavior, aggressive

encounters among panthers, movements and home range shifts, dispersal, survival, recruitment, displacements and replacements of individuals, and other social and ecological interactions were interpreted from radiotelemetry data and field investigations. The study included field observations, radio-telemetry monitoring (>86,000 relocations from 164 individuals representing >3,000 panther-years collected by National Park Service and FWC personnel), and biomedical assessments (404 physical and blood chemistry exams of 173 individuals and >200 necropsies).

Yearly population size estimates are from estimated ages at capture or recovery of carcasses, capture and marking of kittens of known age, and monitoring of radio-collared panthers. Estimated ages of adult panthers were backdated and added to population estimates for previous years.

### **Genetic data and analyses**

Blood and tissue samples were collected from wild-caught and captive panthers from southern Florida since 1978, including pumas from captive populations in Florida and representative pumas from the western United States, including the released Texas females. Total genomic DNA was extracted from blood or tissue samples using one of three standard extraction techniques: phenol-chloroform (S5), salt precipitation (S6), or commercial extraction kits (Qiagen, Valencia, CA).

Twenty-three short-tandem-repeat (STR) loci (F37, F42, FCA43, FCA57, FCA75, FCA90, FCA91, FCA94, FCA95, FCA98, FCA124, FCA133, FCA161, FCA193, FCA 243, FCA249, FCA293, FCA310, FCA369, FCA441, F559, FCA566, FCA668) were selected based on their information content [number of alleles, heterozygosity, and their consistency to amplify in canonical Florida panthers (CFP)] and ease and consistency of scoring from over 250 STRs developed in the domestic cat (*Felis catus*) genome mapping project. STRs were amplified and scored following previously described PCR amplification conditions (S7-8) and were generally repeated 2-5 times for each animal to ensure accuracy and repeatability.

Common measures of STR genetic variation, average observed heterozygosity ( $H_o$ ), average number of alleles per locus, average allele size range per locus, number of unique alleles, and average

variance were estimated with MICROSAT (S9). Heterozygosity values are relative and highly inflated overall since the 23 STR loci were selected from a larger group of 280 loci based on minimum allele frequency of  $>0.1$ . Pairwise genetic distances among individual were estimated based on the proportion of shared alleles (Dps) with [1-ps/kf] option in MICROSAT (S9) and were used to construct neighbor-joining phylogenetic trees with the program NEIGHBOR in the PHYLIP 3.5 package (S10).

A Bayesian procedure, implemented in the program STRUCTURE (S11), was used to identify populations or genetic clusters and to estimate the genetic heritage of individuals (fig. S1, table S2). The Bayesian STRUCTURE approach evaluates conformance of STR loci to Hardy Weinberg and linkage equilibrium in homogenous populations and uses departure as an indication of population substructure. In addition to assigning individuals to various lineages based upon composite STR genotypes, the analysis also estimates the proportion of genetic contribution from each group for individuals of mixed origin.

Animals were assigned to groups of different genetic heritage based on the assignment results from STRUCTURE and from the results of the pedigree analyses that were made using the program CERVUS (version 3.0) (S12). CFP had no direct non-CFP relatives or  $<5\%$  non-CFP genetic contribution from the STRUCTURE analyses.

Animals were assigned to different chronological groups based on the year they were born, using the midpoint of estimated birth dates when exact birth dates were not know, and in some analyses based on if they were alive during a certain time period.

Probable parents were determined using the program CERVUS (version 3.0) (S12) by first testing all individuals as possible parents using the “neither-parent known” option, followed by the “one-parent known” option, and then using field data (known birth and death dates, sex, geographic location, behavioral observations, i.e. denning behavior, etc.) to eliminate individuals. Only parents exhibiting zero “mismatches” with offspring were considered.

An individual exclusion probability, or the average probability of excluding a single unrelated candidate parent from parentage of a given offspring at one or more loci, assuming no typing errors occur was calculated for each offspring in CERVUS (*S12*). If one parent was known, or hypothesized, the exclusion probability was calculated taking into account alleles that were unambiguously descended from the known parent. Using a likelihood approach, a LOD (log-likelihood) score was calculated for every assigned parent or pair of parents in CERVUS based on the genotypes of the candidate parent, offspring and other parent (if known).

Relying primarily on our genetic inferences of parents, but also assisted with information from field observations, an interconnected pedigree was constructed (fig. S3-S4). In a few cases when there was no genetic data available, we included suppositions based on field observations. For example, kittens (< 6-months-old) of the same litter based on field observations (and which were not sampled or genotyped) were assumed to have the same parents as their littermates. Individuals that could not be linked in pedigree either did not have a matching candidate parent or offspring in the data set or had multiple options, among which we could not confidently establish paternity or maternity.

Unless otherwise specified, individuals were grouped into age-classes by calendar years (e.g. in survival estimates). Therefore, for most summaries, each animal has a "kitten year", a "juvenile yr", and "adult years", regardless of when they were born or when they died during that year.

The Seminole Indians maintained a group of western North American pumas in an enclosure on their Reservation (SEM on Fig. 1a) adjacent to the northern boundary of the Big Cypress National Preserve (BCNP, Fig. 1a). From 1997-1999 up to eight individuals periodically escaped and although they were subsequently recaptured, our genetic analyses comparing free-ranging panthers and captive SEM showed that the escaped SEM produced several free-living descendants (Fig. 1A-B, Fig. 2, tables S1-S2 (*S13*)).

An abridged pedigree of the population highlighting CFP lineages is displayed in fig. S3 and TX lineages in fig. S4a-d. Excluding founders, 97 of 108 CFP were assigned at least one parent. At least 14 CFP contributed to the AdmFP population with representation from two of the original

matrilines (FP03 and UCFP15) and one patriline (FP04) (fig. S3, table S2). Many first-order inbreeding loops were observed (red-lines in fig. S3), perpetuated primarily by sires breeding daughters (n=17) or mating between siblings (n=6). Among CFP there was one mother-son and 25 aunt-nephew/ uncle-niece/or first- and second-cousin matings. This inbreeding pattern has continued among the TX offspring, as exemplified by FP79 (fig. S3, S4).

### **Physiological Correlates**

Male testicular development, the presence of cowlicks in the hair pattern on the mid-dorsal thoracic line, and the presence of a kinked tail consisting of an abnormal bend caused by a deformity in one or more terminal tail vertebrae were evaluated during field capture, autopsies, and biomedical physical examinations in captivity. CFP had significantly higher incidence of cowlicks (81% vs 6-38%;  $p<0.05$ ), tail kinks (90% vs 0-40%;  $p<0.05$ ), and cryptorchidism (66% vs 6-17%;  $p<0.05$ ) compared with other panther groups (Table 1).

Prior to 1995, heart murmurs were commonly detected in CFP and eight CFP with congenital atrial septal defects (ASD) (resulting in holes between cardiac atria) were documented at necropsy from 1991-1995 (born 1981-91). Since 1995, nine additional ASD cases have been documented, three in CFP and six in AdmFP (all born since 2001) (table S2-3). Nine of the eleven CFP with an ASD have known sires, and all of these descend from 3 males in FP07's patriline (FP07, FP12 and FP45 in fig. S3). The one AdmFP (FP129) of known parents that exhibited an ASD was the offspring of a father/daughter mating (table S2, fig. S4d). The prevalence of atrial septal defects between CFP and other heritage groups was not significantly different (17% vs 7-14%), but has declined in the population from 21% (in panthers born prior to 1995) to 7.5% (for panthers born 1995-2007) (table S3a-d).

On average, over 70% of CFP had one or more of these four aberrant characters, while 80% of AdmFP exhibited none of these characteristics (table S3b,d). The 1995 TX introduction clearly reduced the incidence of these characters (Table 1, table S3a). For example, 63% of all males (76% of

CFP males) born from 1990-1995 were cryptorchid, including three completely sterile males with no descended testicles (table S2), while 88% of males born 2005-2007, largely AdmFP, had two descended testicles (table S3a).

Sperm was collected from adult males when possible during physical exams, either in the field or in captivity. For sperm collection, each male was induced into a surgical plane of anesthesia following standard protocols (S2, S4). Semen was collected by an electro-ejaculation technique (S14) that relied on a 2.6 cm diameter rectal probe with three longitudinal, stainless-steel electrodes (12.0 x 0.5 cm) and a 60 Hz, sine wave stimulator (P. T. Electronics, Boring, Oregon) which was used to elicit ejaculation following a standardized set of low voltage stimulations (2 to 6 V) over three series of 30 stimuli each. Freshly obtained semen was evaluated for ejaculate volume and sperm concentration via a standard haemocytometer method (S14-S15). Where possible, subjective estimates of sperm motility and forward progression (i.e., the type of forward movement of sperm from rapid, straight direction to quivering, no progression on a scale of 0 to 5; 5 being best) were determined at 400X using a microscope (S14-15). For post-mortem gamete rescue, sperm from minced epididymal tissue collected at necropsy was washed in Ham's F10 medium and similarly analyzed.

An estimate of the frequency of abnormal sperm morphology was determined from fixed aliquots of raw semen as previously described (S15). A 10 ul aliquot of the fresh electroejaculate was added to 100 ul of fixative (0.3% glutaraldehyde in saline) for morphologic examination of spermatozoa by phase-contrast microscopy (1,000X power) (S14-15). Sperm were categorized as normal or as abnormal, with anomalies including macrocephaly, microcephaly, bicephaly, abnormal head shape, abnormal acrosome, coiled flagellum, bent midpiece with cytoplasmic droplet, bent midpiece without cytoplasmic droplet, bent flagellum with cytoplasmic droplet, bent flagellum without cytoplasmic droplet, proximal cytoplasmic droplet, and distal cytoplasmic droplet (S14-15). We are reporting only the most-serious abnormalities (% normal and % head abnormalities).

The CFP testicular volume was significantly smaller than any of the other groups ( $p < 0.05$  for both living and dead males). The inter-mating between a CFP male and a TX female resulted in F1

males (n=2) with testicular volumes significantly larger than the other groups of males (p=0.001, table S5). In other admixed matings (either TX-BC, CFP-BC, or EVG-BC) testicular volume and percent normal sperm declined to values similar to TX males while the percentage of acrosomal defects reverted to former CFP and EVG levels (Table S5-S6).

Florida panthers, both CFP and EVG, produced an extraordinarily low proportion of structurally normal spermatozoa (~5-10%) and a high percentage (>35%) of sperm with a serious deformity in the acrosomal membrane, a structure critical to fertilization. It is noteworthy that wild TX pumas also ejaculate a comparatively high proportion of pleiomorphic spermatozoa (Table 1). However, TX pumas produce considerably fewer sperm with the unusual and serious acrosomal defect than the Florida panther males (13.8% vs 38.9%, table S5-6). CFPxTX-F1 males had fewer acrosomal defects than the TX males and significantly less than all of the other Admixed males (31% vs. 52%, p<0.002, table S5-6). Also, percent normal sperm and testicular volume were significantly higher (p=0.07 and p<0.001 respectively) in the F1s than in all other admixed males (table S5). On balance, despite the high percentage of acrosomal defects and other defective sperm seen in all but the F1 males, there has been a net improvement in male reproductive traits over the CFP and EVG; there are now fewer cryptorchid males with more functional (and larger) testicles per male, all of which should result in better sperm production and improved fertility.

### **Modeling Panther Jumps between Texas Descendants and Canonical Panthers**

We modeled the effect of ancestry (admixed or canonical Florida panthers [AdmFP and CFP, respectively]), sex, and age (as well as their interactions) on the number of times panthers jumped when treed using the SAS GLIMMIX procedure (v9.2) and a Generalized Linear Mixed Model, incorporating the potential explanatory variables and the random variable for each individual panther, and assuming a Poisson distribution for the number of times jumped. The best fit model based on Akaike's information corrected criterion (AICC), as well as the fixed effects, were used to select the best-fitting model based on the potential explanatory variables.



We chose the model that incorporated only ancestry. These models had a lower AICC score and did not have significant effects of either sex or age, or their respective interaction (AICC for Ancestry = 365.88; Ancestry, Sex, Ancestry\*Sex = 366.62; Ancestry, Age, Ancestry\*Age = 369.12). There was a significant effect of ancestry ( $F_{1, 81} = 4.33$ ,  $P = 0.041$ ), with AFP jumping an average of  $0.60 \pm 0.10$  (N = 115 captures of 64 different panthers) times while CFP jumped  $0.34 \pm 0.09$  (N = 61 captures of 31 different panthers) times. There were also significant panther-specific or individual effects, as seen in the significant random effect (Chi square = 8.31,  $p < 0.002$ ). We note that there has been a non-significant trend towards less jumping in AdmFP panthers born between 2001-2008 in comparison to the cohort of AdmFP born between 1995-2000 ( $0.45 \pm 0.11$  vs  $0.77 \pm 0.15$ ;  $F_{1, 51} = 3.51$ ,  $P = 0.067$ ), perhaps as more back-cross panthers with CFP heritage were chased.

### **Kitten Survival**

We estimated kitten survival using the live capture, dead recovery, den failure, and radio-tracking data collected during June 1995 to May 2008 and Burnham's live-recapture dead-recovery modeling framework (*S16*, *S17*). Burnham's model has four parameters: survival probability (S), recapture probability (p), recovery probability (r), and fidelity (F). We fixed F to 1 for all panthers, because the recapture and recovery areas were the same and encompass the entire range of the Florida panther; we also fixed p and r to 1 for radio-collared panthers because we accurately knew fates of radio-collared panthers. Sub-adult and adult panthers were also included in these analyses to more effectively estimate parameters relevant to kitten survival (*S18*).

We present results from a model with additive effects of ancestry (with two ancestry categories: 1) CFP and CFP-BC and 2) EVG-BC, TX-BC, and F1) on kitten survival and an additive effect of ancestry (with two ancestry categories: F1 and all other panthers) on sub-adult and adult survival. Based on Akaike's information criterion adjusted for quasi-likelihood and small sample size (QAICc) ranking, this model was best supported by data (*S18*). We compared this model to one without the effect of ancestry on kitten survival using a likelihood ratio test (*S17*).

### **Sub-Adult and Adult Survival**

We estimated annual survival and examined the effects of covariates using a Cox proportional hazard regression (*S19-S20*) analysis of radio-tracking data. Florida panthers that lost their collars or experienced collar failure were right-censored. We investigated potential effects of genetic ancestry and genetic diversity on survival rates. Given that the first offspring produced by a Texas female were born in 1995 and were not adults until 1997, these analyses were based on a subset of data collected from 1997 until December 31, 2006. Only 2 admixed panthers (born during 1995 and 1996) reached 10 years of age by the end of 2006, and both for periods of <1 year; thus, we excluded older-adult panthers from these analyses. We present results from a model that included interactive effects of sex and age class (sub-adult through adult), and an additive effect of ancestry (2 ancestry categories; F1 and all other panthers). Based on Akaike's information criterion (AIC) ranking, this model was best supported by data (*S21*). We compared this model to an equivalent model without ancestry using a likelihood ratio test.

### **Sub-Adult and Adult Cause-Specific Mortality Analysis**

We attributed mortality of radio-collared panthers to 1 of 4 causes: 1) hit by vehicle, 2) intraspecific aggression, 3) other (included known causes of death such as disease, heart failure, and infections unrelated to intraspecific aggression), and 4) unknown (mortalities for which evidence from field and necropsy examinations was insufficient to assign cause of death). We tested for effects of ancestry and average heterozygosity on cause-specific mortality rates, using the radio-tracking and necropsy data of all sub-adult and adult panthers that could be assigned an ancestry category from 1997-2006. We ran a Cox proportional-hazard regression for each covariate, stratified by the cause of death (*S22*). Risk ratios are presented for covariates that significantly affected cause-specific mortality. For ancestry, we compared cause-specific mortality of all admixed panthers to that of CFP. Risk ratios

for heterozygosity were scaled as the proportional increases in instantaneous hazard from a cause with an increase of 0.1 in the heterozygosity (e.g., 0.2 to 0.3).

We projected female panther survivorship (probability of survival) by ancestry category using estimated survival rates for kittens, sub-adult and adult females by ancestry categories. Survivorship was estimated as the product of annual survival rates. Since we assumed that female panthers become adults at age 2.5, the geometric mean of sub-adult and adult survival was used as the survival rate for ages 2-3. Standard errors were estimated using the delta method with the simplifying assumption that kitten, sub-adult, and adult survivals were independent (S17).

### **Effective Population Size**

The effective population size ( $N_e$ ) was estimated from demographic data as  $N_e = 4N_{ef}N_{em}/(N_{ef}+N_{em})$  based on the number of female ( $N_{ef}$ ) and male ( $N_{em}$ ) breeders (had bred during or prior to that year) during 1995, 1998, 2001, 2004, and 2007 (S23) (roughly 4 generations).

## Supplemental Figures

Figure S1. Genetic heritage of Florida panthers (> 1.5 yr-old) alive in 1995, 1998, 2001, 2004 and 2007 using STR-based Bayesian STRUCTURE analyses (see table S2). The number of genotyped panthers relative to the known number alive is noted at the left for each year. For each year, vertical bars represent unique individuals; Florida panthers to the left of the solid black line are canonical Florida panthers (CFP) or Everglades Florida panthers (EVG) born prior to 1995 and those to the right are genetically admixed Florida panthers (AdmFP). Each bar is colored/shaded in up to nine categories identified by Bayesian STRUCTURE analysis (*S11*). These include groups consisting predominantly of CFP (groups 1-3 in colored boxes), EVG and their descendents (group 4), and five groups of admixed origin, including 2 groups (groups 5-6) with a genetic signal representing predominantly back-crossed CFP (CFP-BC) heritage, one admixed category of approximately 50% TX ancestry (group 7), one reflecting the genetic heritage from the Seminole (SEM) Florida panthers (group 8) (*S13*), and a predominately TX-BC group (group 9). The mean genetic heritage across individuals for each year is depicted in the pie charts, highlighting the numerical percentage representing predominantly CFP genetic heritage. The black diamonds (2007 row) mark the two CFPs (FP113 and FP160) monitored in 2007. FP113 was still being monitored and was breeding in 2010.

### Canonical & Everglades Florida panthers

### Admixed panthers

1995  
(n=26/26)  
(typed/alive)

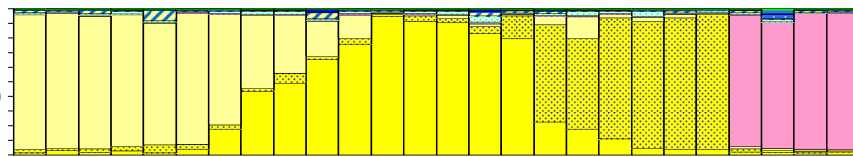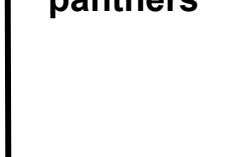

1998  
(n=50/50)

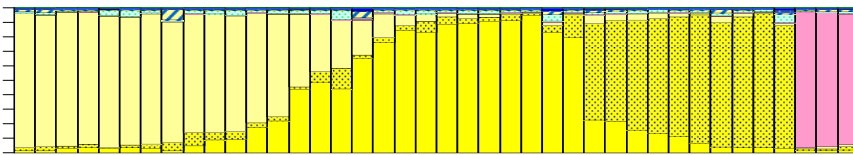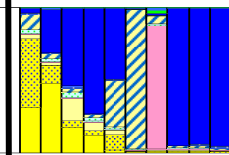

2001  
(n=75/77)

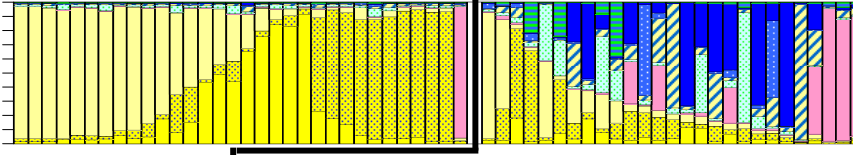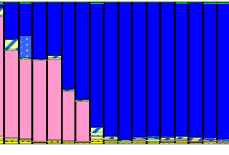

2004  
(n=85/95)

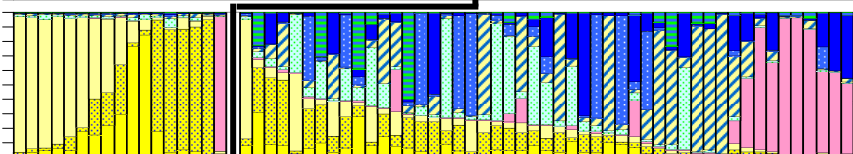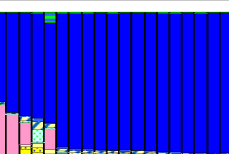

2007  
(n=72/102)

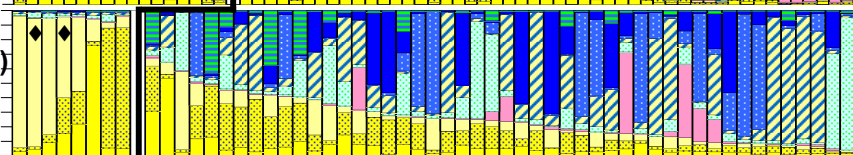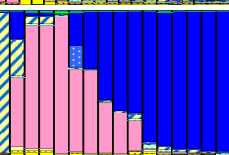

### Structure groups (k=9)

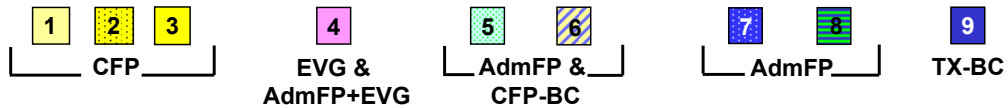

Percent of panthers who are  $\geq 50\%$  CFP (right of thick bar)

Figure S2. Minimum annual panther population size based on inferred genetic heritage from 1986-2007 of both adults (as in Fig. 3a) and kittens. Genetic heritage of post-dispersal (1- 1.5-year-old) and adult (>1.5-year-old) CFP in yellow, EVG in pink, TX in red, CFPxTX-F1 and EVGxTX-F1 in dark orange, and TX-BC in blue and other admixed panthers (AdmFP) in light orange as determined by pedigree data and Bayesian genetic analyses (fig. S1) of STR allele distributions. Individuals that were not genetically characterized are UNK (in green). Kittens (with striated colors) are split into CFP (yellow), EVG (pink), and admixed (in blue), with undetermined shown in green. Yearly numbers are based on estimated ages at capture or recovery of carcasses (e.g., roadway mortality) and on the capture and marking of kittens of known age, and the monitoring of radio-collared panthers. The estimated ages of panthers examined as adults were backdated and were added to population estimates for previous years.

Adult and kitten Florida Panthers of varying heritage: 1986 - 2007

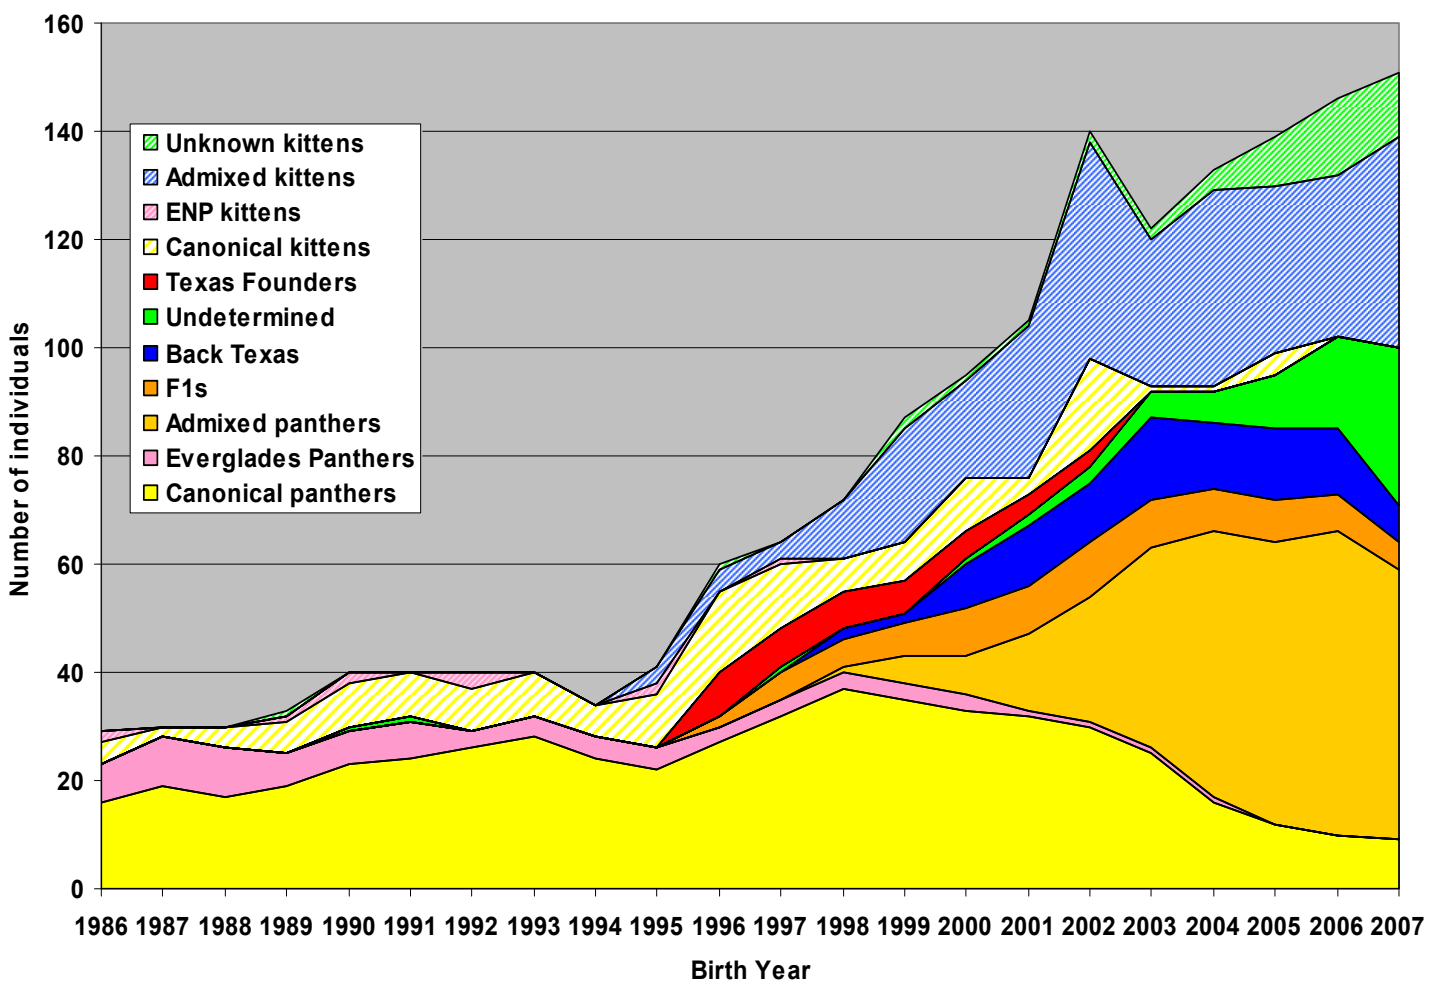

Figure S3. Pedigree of Florida panther population spanning eight generations (>30 years) including principal canonical Florida panthers (CFP; in yellow), introduced Texas (TX) female that successfully bred (in blue), and Everglades panthers (EVG; in pink) that contributed first-generation (F1) admixed offspring. CFP non-breeding females (n=12), neonatal kittens (n=49), and individuals unlinked to this pedigree are excluded (2 parent/offspring pairs). CFP founders (in generations 1-2) are identified by number or as unknown male (Unk CM) or female (Unk CF). The 14 CFP that mated with TX females or their adult descendents (see text) are marked with a “T” and their surviving offspring (n=80) are depicted in Fig. S4a-d. Inbred offspring (first order) are connected with their parents by red lines. One of the two CFP (FP113) that was still being monitored in 2007 is marked by a black diamond (the other is unlinked to this pedigree).



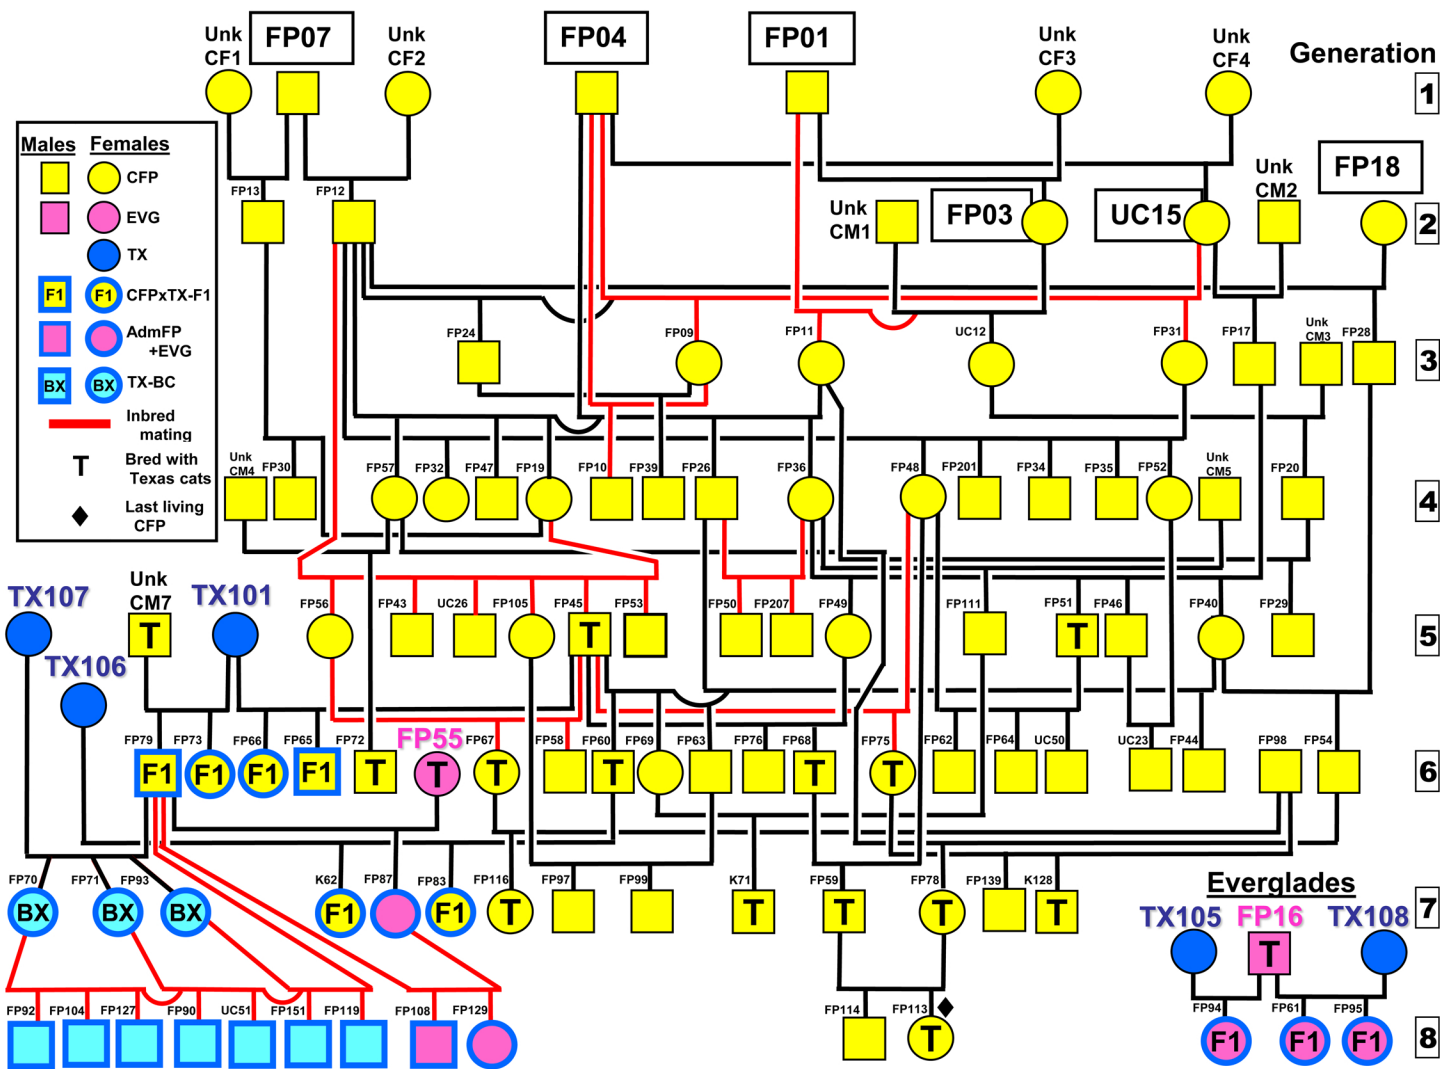

Figure S4. Detailed pedigree of the adult descendents and CFP breeding partners of the five successful TX females introduced into southern Florida in 1995 showing only offspring known to have survived.

a) TX101 produced 4 F1s and bred with two CFPs, b) TX107 bred only with an F1 (FP79) to produce 3 TX-BC offspring, c) TX106 bred with one CFP to produce two F1s and she bred with an unknown Admixed male, d) TX105 and TX-108 both bred FP16 (EVG) to produce 3 F1s.

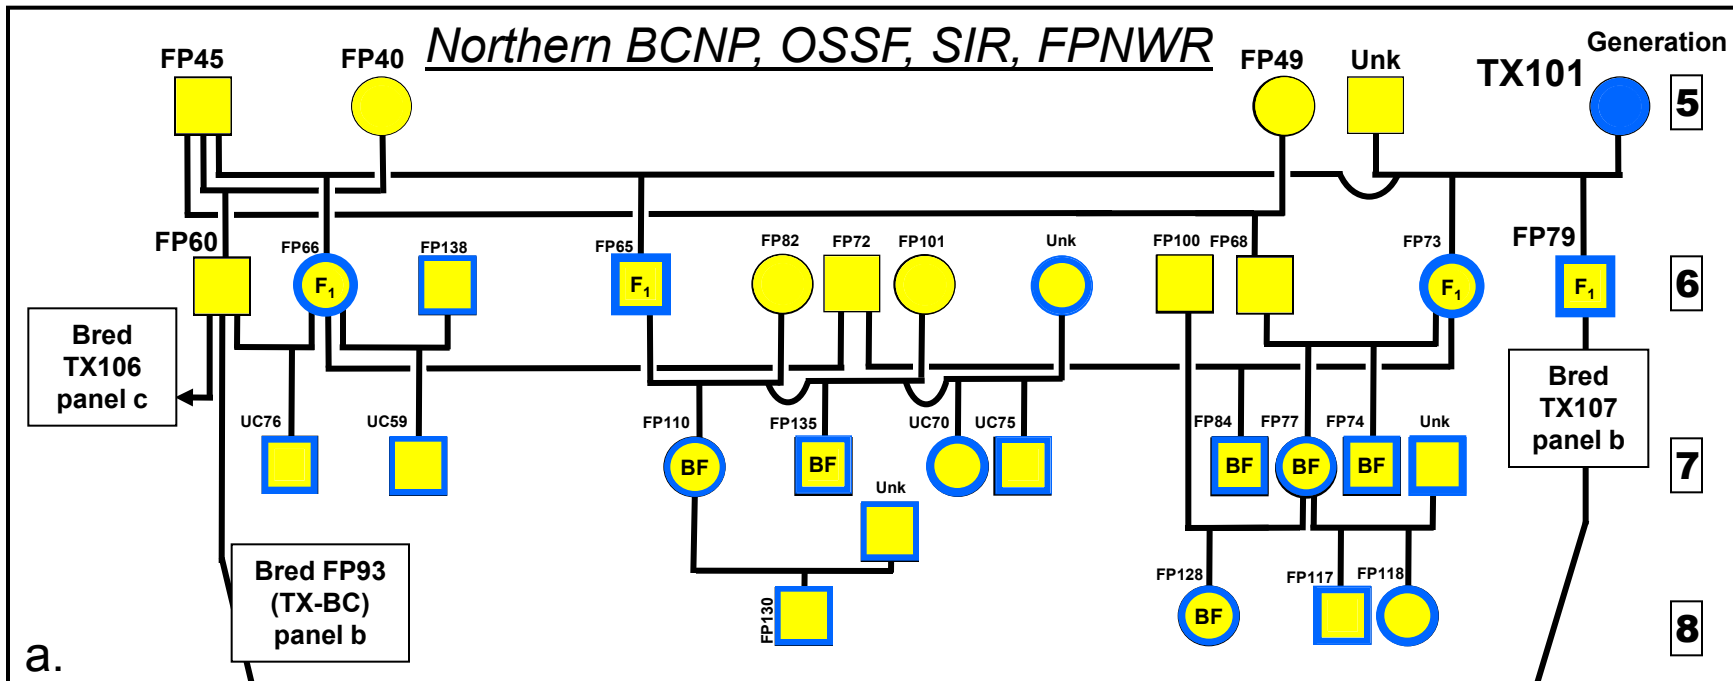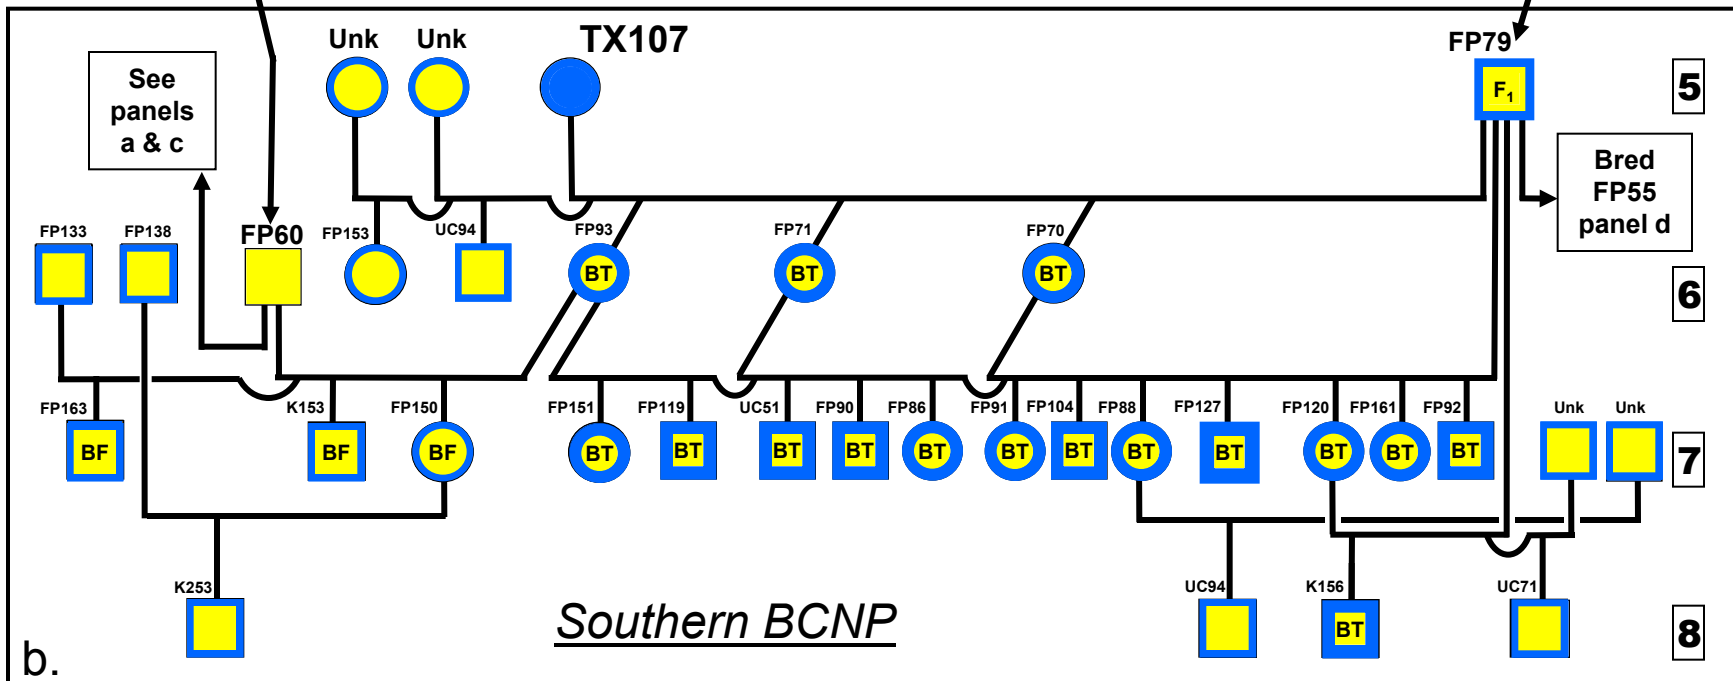

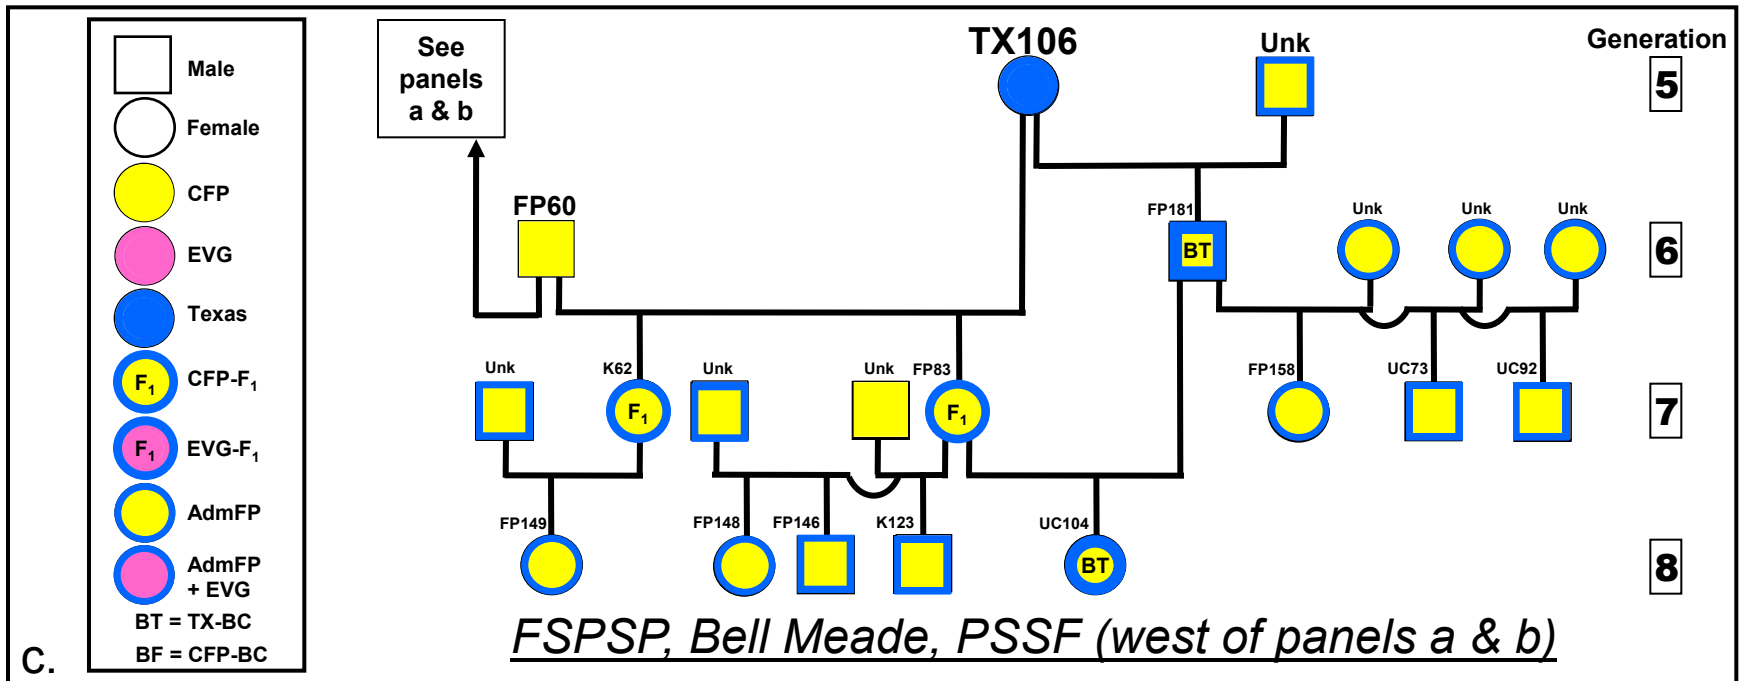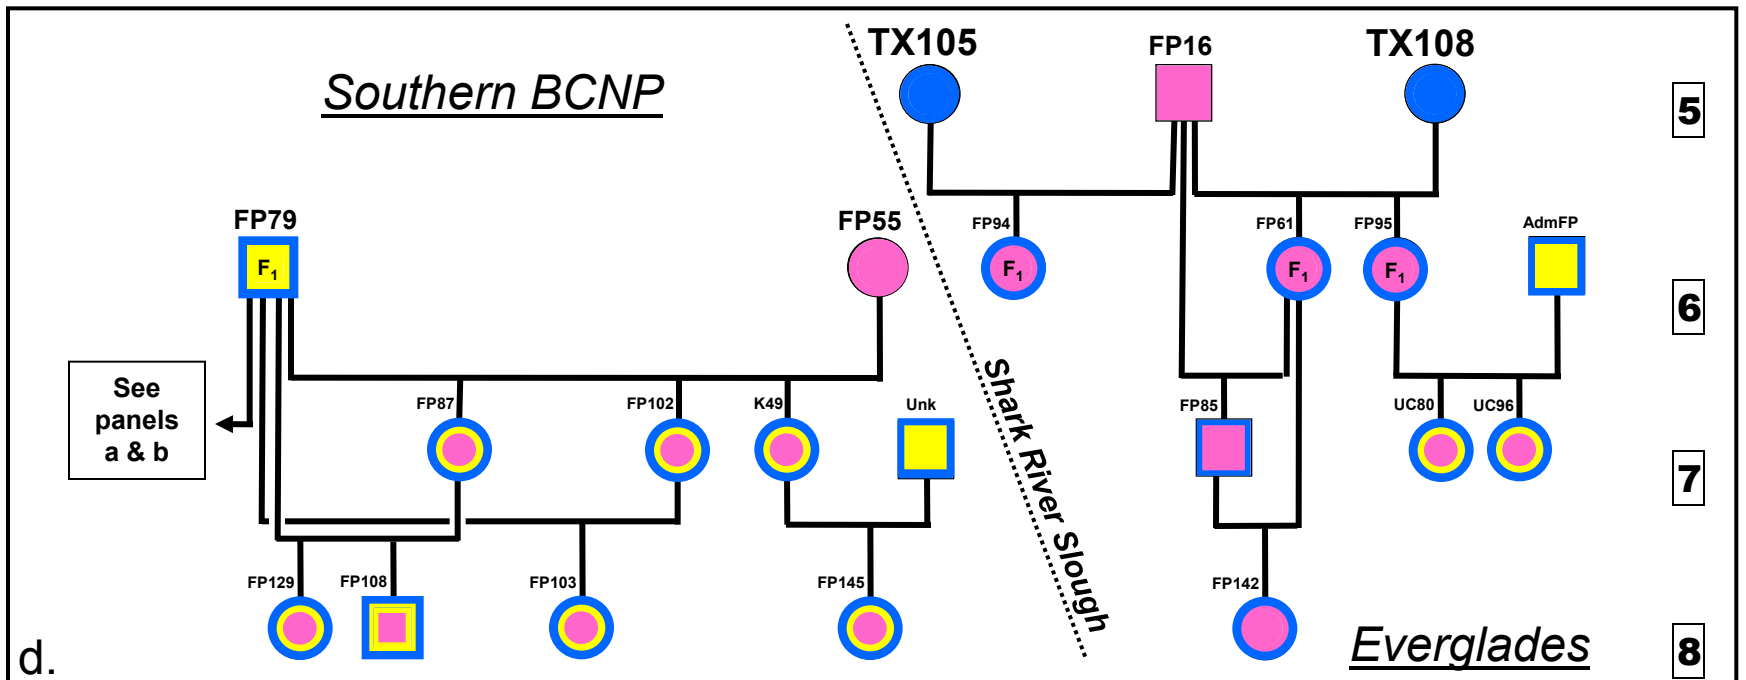

Figure S5. Frequency that the panthers of different genetic heritage jumped from trees after being chased by dogs during capture. a) Admixed panthers, b) CFPs. Per capture event, admixed panthers jumped significantly more often ( $p=0.041$ ) than did the CFPs.

**A.**

**Admixed pumas**

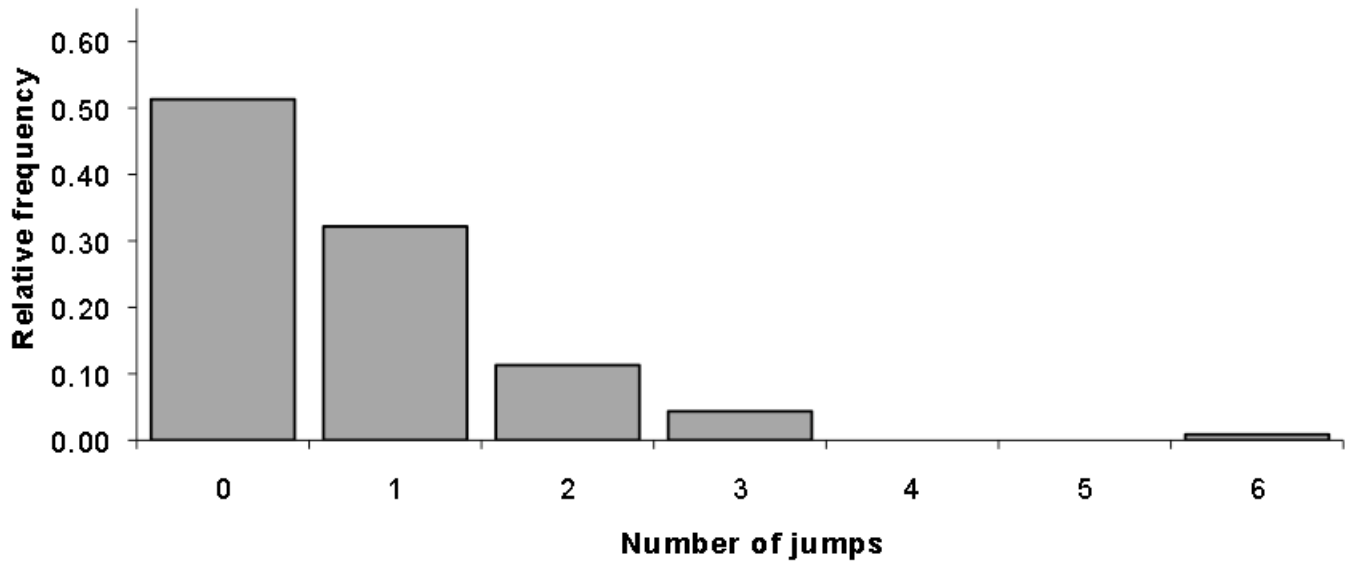

**B.**

**Canonical panthers**

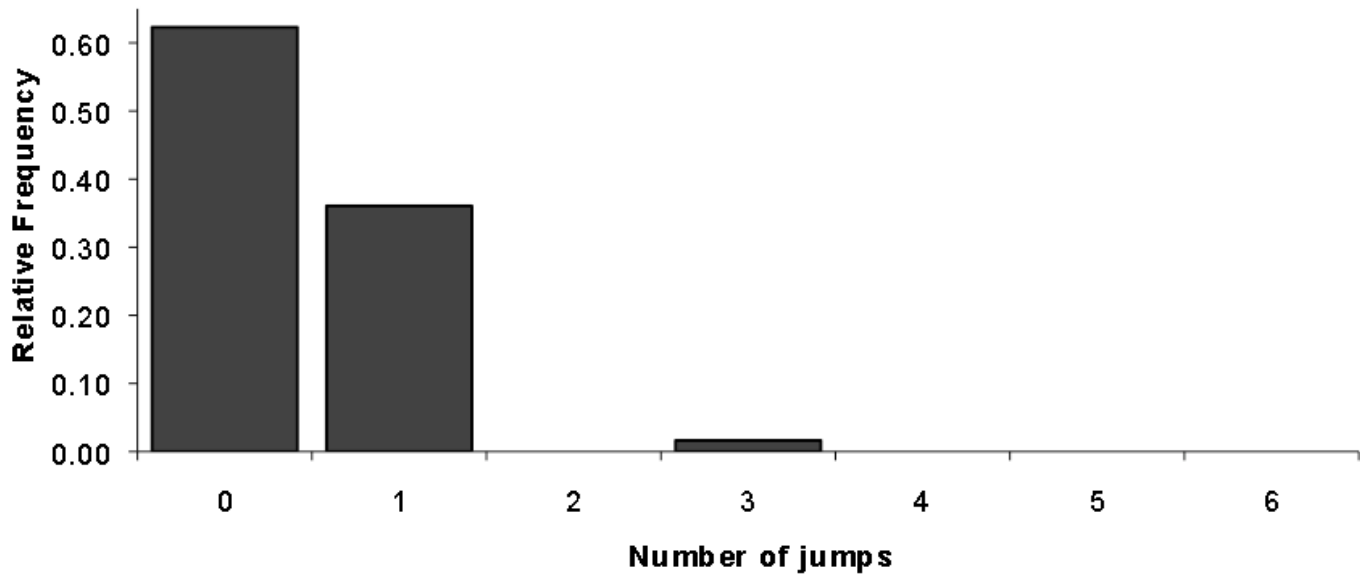

Supplemental table 1. Chronology of significant events in Florida panther research and management.

---

|             |                                                                                                                                                                                                               |
|-------------|---------------------------------------------------------------------------------------------------------------------------------------------------------------------------------------------------------------|
| 1850 - 1900 | Florida panther range contracts from much of southeastern United States to peninsular Florida as hunting, bounties, depredation, and habitat loss extirpate panthers from >95% of original 19th century range |
| 1950 - 1972 | Florida panther widely considered to be extirpated based on lack of field evidence                                                                                                                            |
| 1957 - 1967 | Seven pumas from Les Piper's private collection (Everglades Wonder Garden, Bonita Springs, FL) released into Everglades National Park                                                                         |
| 1958        | Florida panther provided legal protection in Florida                                                                                                                                                          |
| 1967        | Florida panther listed as Federal Endangered Species                                                                                                                                                          |
| 1972        | Presence of Florida panthers confirmed in southern Florida by the capture of aged female at Fish Eating Creek (field survey by World Wildlife Fund(2))                                                        |
| 1972        | First Florida panther road-kill documented in Moorehaven, FL.                                                                                                                                                 |
| 1973        | United States Congress passes the Endangered Species Act and gives Florida panther legal protection                                                                                                           |
| 1976        | Florida Fish and Wildlife Conservation Commission (FWC) begins collection of field observations (>5000 reports processed) and identifies a focal area of panther activity in southwestern Florida (FSSP)      |
| 1981        | FWC commences capture and radio telemetry of panthers                                                                                                                                                         |
| 1982        | Florida panther named Florida state animal                                                                                                                                                                    |
| 1983        | Florida panther biomedical studies and specimen collection initiated                                                                                                                                          |
| 1989        | Florida Panther National Wildlife Refuge and Corkscrew Regional Ecosystem Watershed established, protecting 80,000 acres of habitat                                                                           |
| 1992        | IUCN Captive Breeding Specialist Group Workshop, Yulee, FL, recommends restoration plan to introduce females of Texas puma subspecies into Florida                                                            |
| 1995        | Eight female pumas from Texas captured and translocated to Florida                                                                                                                                            |
| 1997 - 1999 | Periodic escapes of captive western pumas from the Seminole Indian Reservation                                                                                                                                |
| 1998        | First documented dispersal of a collared panther to the north of the Caloosahatchee River                                                                                                                     |
| 2002 - 2004 | Feline Leukemia Virus outbreak implicated in the death of 5 panthers                                                                                                                                          |
| 2003        | Last Texas female puma removed from Florida                                                                                                                                                                   |
| 2007        | The 100 <sup>th</sup> panther mortality by vehicle collision documented                                                                                                                                       |
| 2008        | Male panther from southern Florida shot near Georgia/Alabama state line, approximately 100km southwest of Atlanta, Georgia                                                                                    |

---

Supplemental table 2. List of 591 pumas used in analyses with demographic information, occurrence of traits, diversity estimates, dam and sire identification, pedigree information, and structure results. Symbols and abbreviations are defined in the first panel.



| Description of Table Columns                                                                                                                                                                                                                                                                                                                                                                                                                                                                                                                                        |                                                                                                                                                                                                                                                                                                                                                                                                                                                                                            |
|---------------------------------------------------------------------------------------------------------------------------------------------------------------------------------------------------------------------------------------------------------------------------------------------------------------------------------------------------------------------------------------------------------------------------------------------------------------------------------------------------------------------------------------------------------------------|--------------------------------------------------------------------------------------------------------------------------------------------------------------------------------------------------------------------------------------------------------------------------------------------------------------------------------------------------------------------------------------------------------------------------------------------------------------------------------------------|
| <b>Color Codes</b>                                                                                                                                                                                                                                                                                                                                                                                                                                                                                                                                                  |                                                                                                                                                                                                                                                                                                                                                                                                                                                                                            |
|                                                                                                                                                                                                                                                                                                                                                                                                                                                                                    | Canonical Florida panther (CFP)                                                                                                                                                                                                                                                                                                                                                                                                                                                            |
|                                                                                                                                                                                                                                                                                                                                                                                                                                                                                    | Everglades Florida panther (EVG) or part of pedigree can be traced to an EVG founder (pink)                                                                                                                                                                                                                                                                                                                                                                                                |
|                                                                                                                                                                                                                                                                                                                                                                                                                                                                                    | AdmFP that is derived from TX, but specific the founders are unknown (magenta)                                                                                                                                                                                                                                                                                                                                                                                                             |
|                                                                                                                                                                                                                                                                                                                                                                                                                                                                                    | AdmFP that is derived from TX, but specific founders are unknown                                                                                                                                                                                                                                                                                                                                                                                                                           |
|                                                                                                                                                                                                                                                                                                                                                                                                                                                                                    | Texas ancestry can be traced through each generation to a specific Texas female ancestor                                                                                                                                                                                                                                                                                                                                                                                                   |
|                                                                                                                                                                                                                                                                                                                                                                                                                                                                                    | AdmFP that shares some Seminole heritage in addition to the Texas ancestry (has one unique Seminole allele, or parent or littermate has this)                                                                                                                                                                                                                                                                                                                                              |
|                                                                                                                                                                                                                                                                                                                                                                                                                                                                                    | AdmFP that has a lot of Seminole heritage (either shown by structure or by 2 or more unique Seminole alleles in self, parent or littermate)                                                                                                                                                                                                                                                                                                                                                |
|                                                                                                                                                                                                                                                                                                                                                                                                                                                                                    | AdmFP is a descendent of FP79, either known from the pedigree or inferred by presence of his unique allele (348 at F42)                                                                                                                                                                                                                                                                                                                                                                    |
|                                                                                                                                                                                                                                                                                                                                                                                                                                                                                    | Unknown genetic heritage - either tissue is not available, is of poor quality, or has not been analyzed yet                                                                                                                                                                                                                                                                                                                                                                                |
|                                                                                                                                                                                                                                                                                                                                                                                                                                                                                    | Abnormal value or outlier (i.e. released cats)                                                                                                                                                                                                                                                                                                                                                                                                                                             |
| <b>Field ID</b>                                                                                                                                                                                                                                                                                                                                                                                                                                                                                                                                                     |                                                                                                                                                                                                                                                                                                                                                                                                                                                                                            |
| <b>K #</b>                                                                                                                                                                                                                                                                                                                                                                                                                                                                                                                                                          | Kittens handled in the den are given a sequential "K#", if found dead they usually continue to be identified by their K#                                                                                                                                                                                                                                                                                                                                                                   |
| <b>FP#</b>                                                                                                                                                                                                                                                                                                                                                                                                                                                                                                                                                          | Live captured panthers are assigned a sequential "Florida panther (FP)" number, including those previously marked as kittens (note that FP200-FP210 were captured and brought into captivity in the early 1990s)                                                                                                                                                                                                                                                                           |
| <b>UCFP#</b>                                                                                                                                                                                                                                                                                                                                                                                                                                                                                                                                                        | Dead panthers not previously handled are given a sequential "Un-collared Florida Panther" #                                                                                                                                                                                                                                                                                                                                                                                                |
| <b>WC#</b>                                                                                                                                                                                                                                                                                                                                                                                                                                                                                                                                                          | Seminole Indian Reservation pumas identified as "WC" for Weed Cat (pumas originated from Frank Weed)                                                                                                                                                                                                                                                                                                                                                                                       |
| <b>Piper</b>                                                                                                                                                                                                                                                                                                                                                                                                                                                                                                                                                        | These animals are descendents of the panthers bred by Lester Piper (PIP) of Everglades Wonder Gardens (EWG), Bonita Springs. They were sampled in the 1980s and resided at multiple zoos and private facilities in Florida, including several still living at EWG. The oldest animal sampled was born in the early 1960s (Pco-11, "Camp Kalaqua") thus is representative of the animals released into Everglades National Park at that time (see Fig 2 for similarity to present day EVGs) |
| <b>Genetic Group</b> - primary designation: C - Canonical FP, E - Everglades FP, H - admixed (non-Florida), T - Texas founders, U - unknown                                                                                                                                                                                                                                                                                                                                                                                                                         |                                                                                                                                                                                                                                                                                                                                                                                                                                                                                            |
| <b>PCO#:</b> Laboratory of Genomic diversity (NCI) database ID for Puma concolor (Pco)                                                                                                                                                                                                                                                                                                                                                                                                                                                                              |                                                                                                                                                                                                                                                                                                                                                                                                                                                                                            |
| <b>FLMNH (UF#):</b> Mammal collection ID numbers from the University of Florida Museum of Natural History, Gainesville, FL                                                                                                                                                                                                                                                                                                                                                                                                                                          |                                                                                                                                                                                                                                                                                                                                                                                                                                                                                            |
| <b>Necropsy ID:</b>                                                                                                                                                                                                                                                                                                                                                                                                                                                                                                                                                 |                                                                                                                                                                                                                                                                                                                                                                                                                                                                                            |
| <b>G#</b>                                                                                                                                                                                                                                                                                                                                                                                                                                                                                                                                                           | Early necropsies in the 1980s conducted by Dr. Don Forrester, Dept. of Parasitology, U of F, Gainesville, FL; <b>N#</b> - Veterinary Teaching Hospital, University of Florida Veterinary School; <b>CC#</b> - Southeastern Cooperative Wildlife Disease Study (SCWDS) College of Veterinary Medicine, Athens, Georgia.                                                                                                                                                                     |
| <b>County of residence</b>                                                                                                                                                                                                                                                                                                                                                                                                                                                                                                                                          |                                                                                                                                                                                                                                                                                                                                                                                                                                                                                            |
| Florida County(ies) where the panther lived (or dispersed to) while radio-collared or where the carcass of an UCFP was found. Abbreviations: Br - Broward, Co - Collier, Da - Dade, Gl - Glades, He - Hendry, Hi - Highlands, Hil - Hillsborough, Le - Lee, Mo - Monroe, PB - Palm Beach, P Beach - Palm Beach                                                                                                                                                                                                                                                      |                                                                                                                                                                                                                                                                                                                                                                                                                                                                                            |
| <b>Status on 4/1/2010</b>                                                                                                                                                                                                                                                                                                                                                                                                                                                                                                                                           |                                                                                                                                                                                                                                                                                                                                                                                                                                                                                            |
| <b>Alive:</b> radio collared and still monitored; <b>Captivity:</b> removed from the wild (illness, injury, orphaned, or for captive breeding) and is permanently residing in captivity; <b>Radio-failure (RF):</b> either radio-collar has malfunctioned or has dropped off, so animal cannot be followed nor can it be determined if they are still alive or not; <b>Dead:</b> body or remains collected; <b>Kitten unk:</b> handled and marked as a kitten, but it has not been handled since, therefore do not know if they are alive or not (majority or dead) |                                                                                                                                                                                                                                                                                                                                                                                                                                                                                            |
| <b>Description of Table Columns</b>                                                                                                                                                                                                                                                                                                                                                                                                                                                                                                                                 |                                                                                                                                                                                                                                                                                                                                                                                                                                                                                            |
| <b>Morphological traits; Atrial Septal defects, Number of descended testicles, presence of thoracic cowlick or kinked tail</b>                                                                                                                                                                                                                                                                                                                                                                                                                                      |                                                                                                                                                                                                                                                                                                                                                                                                                                                                                            |
| <b>No:</b> body examined and trait not present; <b>Yes:</b> body examined and trait present; <b>Unk:</b> unknown (or unknowable - carcass scavenged); <b>Lost-RF:</b> animal has been lost to carcass retrieval as its radio-collar failed; <b>1 or 2:</b> number of intra-scrotal testicles found; <b>na:</b> not applicable (female); <b>TBD</b> - to be determined, necropsy pending                                                                                                                                                                             |                                                                                                                                                                                                                                                                                                                                                                                                                                                                                            |
| <b>Pedigree</b>                                                                                                                                                                                                                                                                                                                                                                                                                                                                                                                                                     |                                                                                                                                                                                                                                                                                                                                                                                                                                                                                            |
| Colored squares representing ancestry - up to 4 sets of grandparents can be shown. Dams' heritage is always on the left, sire on the right, i.e. if only the parents are known, then the 4 left hand squares represent the dam and the 4 on the right represent the sire. If both sets of grandparents are known - then the first 2 squares are the dams mother and the next are her sires etc.                                                                                                                                                                     |                                                                                                                                                                                                                                                                                                                                                                                                                                                                                            |
| <b>Field Dam</b>                                                                                                                                                                                                                                                                                                                                                                                                                                                                                                                                                    |                                                                                                                                                                                                                                                                                                                                                                                                                                                                                            |
| Identified as the dam by field observations and is based on the proximity of the adult female when the juvenile/sub-adult was captured OR the was the adult female attending the den (with kittens). Unknown (Unk) means no field dam was suspected.                                                                                                                                                                                                                                                                                                                |                                                                                                                                                                                                                                                                                                                                                                                                                                                                                            |
| <b>Genetic Dam</b>                                                                                                                                                                                                                                                                                                                                                                                                                                                                                                                                                  |                                                                                                                                                                                                                                                                                                                                                                                                                                                                                            |
| Genotype data was analyzed by CERVUS and it was determined that this female was a good match (with input from field information about which females were alive and conceivably in the area). If parent was unknown (unk) it was because either <b>PNI</b> (parent not identified), <b>MMI</b> (multiple matches were identified but there was no field data to support the selection of any particular female over another), <b>pqd</b> (poor quality DNA), <b>sna</b> (the sample was not available), or <b>ND</b> (not determined yet)                            |                                                                                                                                                                                                                                                                                                                                                                                                                                                                                            |
| <b>Dam Consensus</b> - Assignment of parent was inferred based on a combination of Field Dam and Genetic dam evidence (see above), with weight given to genetic data.                                                                                                                                                                                                                                                                                                                                                                                               |                                                                                                                                                                                                                                                                                                                                                                                                                                                                                            |
| <b>LOD score</b> for support of the Dam - offspring pair                                                                                                                                                                                                                                                                                                                                                                                                                                                                                                            |                                                                                                                                                                                                                                                                                                                                                                                                                                                                                            |
| <b>Dam Support codes:</b>                                                                                                                                                                                                                                                                                                                                                                                                                                                                                                                                           |                                                                                                                                                                                                                                                                                                                                                                                                                                                                                            |
| Summary of evidence that final decision was based upon. <b>F</b> - field observation, <b>G</b> - genetic, <b>LMG</b> - littermate genetics (if self is lacking), <b>T</b> - telemetric data (i.e. overlapping use area with offspring & mate), or <b>TC</b> - telemetry data at conception date showed evidence of a male overlapping her location on one to several days.                                                                                                                                                                                          |                                                                                                                                                                                                                                                                                                                                                                                                                                                                                            |
| <b>Field SIRE:</b> is based on the radio-collared males' movements and home range as he associated with the putative dam.                                                                                                                                                                                                                                                                                                                                                                                                                                           |                                                                                                                                                                                                                                                                                                                                                                                                                                                                                            |
| <b>Genetic Sire, Sire consensus, Sire -offspring LOD score, and sire support:</b> same as for female                                                                                                                                                                                                                                                                                                                                                                                                                                                                |                                                                                                                                                                                                                                                                                                                                                                                                                                                                                            |
| <b>Dam-Sire-Offspring Trio LOD score:</b> LOD score for all three individuals taken together                                                                                                                                                                                                                                                                                                                                                                                                                                                                        |                                                                                                                                                                                                                                                                                                                                                                                                                                                                                            |
| <b>Ave Het:</b> Average heterozygosity; <b>Ave # Alleles:</b> average number of alleles for all the STRs analyzed for that individual                                                                                                                                                                                                                                                                                                                                                                                                                               |                                                                                                                                                                                                                                                                                                                                                                                                                                                                                            |
| <b>Heritage call</b>                                                                                                                                                                                                                                                                                                                                                                                                                                                                                                                                                |                                                                                                                                                                                                                                                                                                                                                                                                                                                                                            |
| This is based on a combination of information: the individuals' pedigree (if known), STRUCTURE results (>5% non-Florida = admixed), and an inspection of microsatellite data looking for non-Florida alleles. In all cases, if one sibling shows evidence of admixture, this same status is assigned to all littermates. If panthers are obviously admixed, but lack the pedigree information to determine whether they are back-crossed to CFP, EVG, or TX, they are called "Admixed" or AdmFP. +SEM = Seminole heritage                                           |                                                                                                                                                                                                                                                                                                                                                                                                                                                                                            |
| <b>Structure results -</b>                                                                                                                                                                                                                                                                                                                                                                                                                                                                                                                                          |                                                                                                                                                                                                                                                                                                                                                                                                                                                                                            |
| STRUCTURE analysis defined 9 groups (K9): <b>K1, K2, and K3</b> - 3 family groups of CFP, <b>K4</b> - EVG and Admixed+EVG (including the EVGxTX-F1s), <b>K5</b> - mostly CFP-BCs and FP107s family members, <b>K6</b> - mostly CFP-BC with some AdmFPs and a few CFPxTX-F1s, <b>K7</b> - AdmFPs and some F1s, <b>K8</b> - AdmFP and Seminole heritage, <b>K9</b> - mostly TX-BC and FP79's family (colors/patterns at top of column match the corresponding bar segments in Fig 3.)                                                                                 |                                                                                                                                                                                                                                                                                                                                                                                                                                                                                            |

**DEMOGRAPHIC INFORMATION**

**TRAITS**

**PEDIGREE**

| Field ID & Genetic group | SEX | PCO# | FLMNH & Necropsy IDs | County         | Birth Year | Loss Year | Status on 4/1/2010 | Atrial Septal Defect | Number of Descended Testicles | Thoracic Cowlick | Tail tip Kink | Pedigree |      |  |  |  |  |  |
|--------------------------|-----|------|----------------------|----------------|------------|-----------|--------------------|----------------------|-------------------------------|------------------|---------------|----------|------|--|--|--|--|--|
|                          |     |      |                      |                |            |           |                    |                      |                               |                  |               | Dam      | Sire |  |  |  |  |  |
| <b>FLORIDA PANTHERS</b>  |     |      |                      |                |            |           |                    |                      |                               |                  |               |          |      |  |  |  |  |  |
| FP001                    | C   | M    | Pco-0048             | UF19096 G83-64 | Collier    | 1971      | 1983               | Dead                 | Unk                           | 2                | Yes           | Yes      |      |  |  |  |  |  |
| FP002                    | C   | M    | Pco-0049             | UF20777        | Collier    | 1971      | 1984               | Dead                 | Unk                           | 2                | Yes           | Yes      |      |  |  |  |  |  |
| FP003                    | C   | F    | Pco-0938             | UF18798        | Collier    | 1973      | 1983               | Dead                 | Unk                           | na               | Yes           | Yes      |      |  |  |  |  |  |
| FP004                    | C   | M    | Pco-0009             | UF22529        | Collier    | 1974      | 1985               | Dead                 | Unk                           | 1                | Yes           | Yes      |      |  |  |  |  |  |
| FP005                    | C   | F    | Pco-0939             | UF19090        | Collier    | 1974      | 1983               | Dead                 | Unk                           | na               | Yes           | Yes      |      |  |  |  |  |  |
| FP006                    | C   | M    | Pco-0940             | UF16374        | Collier    | 1975      | 1982               | Dead                 | Unk                           | 2                | No            | Yes      |      |  |  |  |  |  |
| FP007                    | C   | M    | Pco-0013             | UF22409        | Collier    | 1975      | 1985               | Dead                 | No                            | 2                | Yes           | Yes      |      |  |  |  |  |  |
| FP008                    | C   | F    | Pco-0012             | UF24267        | Collier    | 1974      | 1987               | Captivity            | No                            | na               | Yes           | Yes      |      |  |  |  |  |  |
| FP009                    | C   | F    | Pco-0014             |                | Collier    | 1981      | 1997               | Radio failure        | Unk                           | na               | Yes           | Yes      |      |  |  |  |  |  |
| FP010                    | C   | M    | Pco-0018             | UF23986 G84-26 | Collier    | 1985      | 1987               | Dead                 | Unk                           | 2                | Yes           | Yes      |      |  |  |  |  |  |
| FP011                    | C   | F    | Pco-0019             | UF30391        | Collier    | 1981      | 2001               | Dead                 | Unk                           | na               | Yes           | Yes      |      |  |  |  |  |  |
| FP012                    | C   | M    | Pco-0020             | UF27616        | Hendry     | 1981      | 1994               | Dead                 | Yes                           | 1                | Yes           | Yes      |      |  |  |  |  |  |
| FP013                    | C   | M    | Pco-0022             | UF24096        | Collier    | 1981      | 1987               | Dead                 | Unk                           | 2                | Yes           | Yes      |      |  |  |  |  |  |
| FP014                    | E   | F    | Pco-0061             | UF18847        | Dade       | 1981      | 1991               | Dead                 | Unk                           | na               | No            | No       |      |  |  |  |  |  |
| FP015                    | E   | F    | Pco-0062             | UF24563        | Dade       | 1981      | 1988               | Dead                 | Unk                           | na               | No            | No       |      |  |  |  |  |  |
| FP016                    | E   | M    | Pco-0065             | UF29821        | Da & Co    | 1985      | 2000               | Dead                 | No                            | 2                | Yes           | No       |      |  |  |  |  |  |
| FP017                    | C   | M    | Pco-0067             | UF24646        | Collier    | 1980      | 1990               | Dead                 | Unk                           | 2                | Yes           | Yes      |      |  |  |  |  |  |
| FP018                    | C   | F    | Pco-0068             | UF24928        | Hendry     | 1979      | 1990               | Dead                 | Unk                           | na               | Yes           | Yes      |      |  |  |  |  |  |
| FP019                    | C   | F    | Pco-0069             |                | Collier    | 1986      | 1997               | Dead                 | No                            | na               | No            | Yes      |      |  |  |  |  |  |
| FP020                    | C   | M    | Pco-0071             | UF24314        | Collier    | 1983      | 1988               | Dead                 | Yes                           | 1                | Yes           | Yes      |      |  |  |  |  |  |
| FP021                    | E   | F    | Pco-0075             |                | Dade       | 1985      | 1988               | Captivity            | No                            | na               | No            | No       |      |  |  |  |  |  |
| FP022                    | E   | F    | Pco-0076             | UF26161        | Dade       | 1986      | 1991               | Dead                 | No                            | na               | No            | No       |      |  |  |  |  |  |
| FP023                    | E   | F    | Pco-0077             | UF30393        | Da & Co    | 1986      | 2000               | Dead                 | Unk                           | na               | No            | No       |      |  |  |  |  |  |
| FP024                    | C   | M    | Pco-0107             | UF24316        | Gl & Hi    | 1984      | 1988               | Dead                 | Unk                           | 2                | Yes           | Yes      |      |  |  |  |  |  |
| FP025                    | E   | M    | Pco-0116             | UF24315        | Collier    | 1983      | 1988               | Dead                 | Unk                           | 2                | Yes           | No       |      |  |  |  |  |  |
| FP026                    | C   | M    | Pco-0118             | UF26939        | Hendry     | 1982      | 1994               | Dead                 | Unk                           | 1                | No            | Yes      |      |  |  |  |  |  |
| FP027                    | E   | F    | Pco-0120             | UF24557        | Dade       | 1985      | 1989               | Dead                 | No                            | na               | No            | No       |      |  |  |  |  |  |
| FP028                    | C   | M    | Pco-0154             | UF26157        | Collier    | 1987      | 1992               | Dead                 | No                            | 1                | Yes           | Yes      |      |  |  |  |  |  |
| FP029                    | C   | M    | Pco-0155             | UF26159        | Hendry     | 1988      | 1992               | Dead                 | No                            | 1                | Yes           | Yes      |      |  |  |  |  |  |
| FP030                    | C   | M    | Pco-0156             | UF24621        | Collier    | 1988      | 1990               | Dead                 | No                            | 1                | Yes           | Yes      |      |  |  |  |  |  |
| FP031                    | C   | F    | Pco-0157             | UF27148        | Collier    | 1981      | 1994               | Dead                 | No                            | na               | Yes           | Yes      |      |  |  |  |  |  |
| FP032                    | C   | F    | Pco-0160             | UF30960        | Collier    | 1986      | 2002               | Dead                 | No                            | na               | Yes           | Yes      |      |  |  |  |  |  |
| FP033                    | C   | M    | Pco-0162             | UF24595        | Co & He    | 1987      | 1989               | Dead                 | No                            | 2                | Yes           | Yes      |      |  |  |  |  |  |
| FP034                    | C   | M    | Pco-0170             | UF26844        | Hendry     | 1989      | 1993               | Dead                 | No                            | 1                | Yes           | Yes      |      |  |  |  |  |  |
| FP035                    | C   | M    | Pco-0171             | UF24611        | Collier    | 1989      | 1990               | Dead                 | Unk                           | 1                | Yes           | Yes      |      |  |  |  |  |  |
| FP036                    | C   | F    | Pco-0174             | UF29621        | Collier    | 1985      | 1998               | Dead                 | No                            | na               | Yes           | No       |      |  |  |  |  |  |
| FP037                    | E   | M    | Pco-0175             | UF24931        | Collier    | 1986      | 1990               | Dead                 | Unk                           | 2                | No            | No       |      |  |  |  |  |  |
| FP038                    | C   | F    | Pco-0176             | UF27370        | Co & Br    | 1985      | 1994               | Dead                 | Yes                           | na               | Yes           | Yes      |      |  |  |  |  |  |
| FP039                    | C   | M    | Pco-0177             | UF24644        | Dade       | 1986      | 1990               | Dead                 | Unk                           | 1                | Yes           | Yes      |      |  |  |  |  |  |
| FP040                    | C   | F    | Pco-0180             | UF28980        | Collier    | 1988      | 1998               | Dead                 | No                            | na               | Yes           | No       |      |  |  |  |  |  |
| FP041                    | C   | F    | Pco-0181             | UF24929        | Hendry     | 1988      | 1990               | Dead                 | Unk                           | na               | Yes           | No       |      |  |  |  |  |  |
| FP042                    | E   | M    | Pco-0182             | UF27700        | Da & Co    | 1989      | 1995               | Dead                 | No                            | 2                | No            | Yes      |      |  |  |  |  |  |
| FP043                    | C   | M    | Pco-0184             | UF26083        | Co & He    | 1989      | 1991               | Dead                 | Unk                           | 1                | Yes           | No       |      |  |  |  |  |  |
| FP044                    | C   | M    | Pco-0348             | UF26841        | Co & Da    | 1990      | 1993               | Dead                 | Unk                           | 1                | No            | Yes      |      |  |  |  |  |  |
| FP045                    | C   | M    | Pco-0349             | UF29262        | Co & He    | 1990      | 1998               | Dead                 | Unk                           | 1                | Yes           | Yes      |      |  |  |  |  |  |
| FP046                    | C   | M    | Pco-0422             | UF29370        | Hendry     | 1989      | 1999               | Dead                 | No                            | 1                | Yes           | Yes      |      |  |  |  |  |  |
| FP047                    | C   | M    | Pco-0423             | UF26840        | Collier    | 1991      | 1993               | Dead                 | Yes                           | 1                | Yes           | Yes      |      |  |  |  |  |  |
| FP048                    | C   | F    | Pco-0424             |                | Collier    | 1991      | 2006               | Dead                 | Unk                           | na               | Yes           | Yes      |      |  |  |  |  |  |
| FP049                    | C   | F    | Pco-0425             | UF30935        | Collier    | 1990      | 2002               | Dead                 | No                            | na               | Yes           | No       |      |  |  |  |  |  |
| FP050                    | C   | M    | Pco-0426             | UF26843        | Hendry     | 1991      | 1993               | Dead                 | No                            | 1                | Yes           | Yes      |      |  |  |  |  |  |
| FP051                    | C   | M    | Pco-0428             | UF29263        | Collier    | 1989      | 1998               | Dead                 | No                            | 2                | Yes           | Yes      |      |  |  |  |  |  |
| FP052                    | C   | F    | Pco-0485             | UF27618        | Collier    | 1991      | 1995               | Dead                 | Yes                           | na               | Yes           | Yes      |      |  |  |  |  |  |
| FP053                    | C   | M    | Pco-0532             | UF26842        | Collier    | 1992      | 1993               | Dead                 | Unk                           | 2                | Yes           | Yes      |      |  |  |  |  |  |
| FP054                    | C   | M    | Pco-0486             |                | Collier    | 1992      | 2000               | Radio failure        | Unk                           | 2                | Yes           | Yes      |      |  |  |  |  |  |
| FP055                    | E   | F    | Pco-0540             | UF31106        | Collier    | 1992      | 2004               | Dead                 | Unk                           | na               | No            | Yes      |      |  |  |  |  |  |
| FP056                    | C   | F    | Pco-0717             |                | Collier    | 1991      | 1999               | Radio failure        | Unk                           | na               | Yes           | Yes      |      |  |  |  |  |  |
| FP057                    | C   | F    | Pco-0535             |                | Collier    | 1992      | 2000               | Radio failure        | Unk                           | na               | No            | Yes      |      |  |  |  |  |  |

Table S2

**DEMOGRAPHIC INFORMATION**

**TRAITS**

**PEDIGREE**

| Field ID & Genetic group | SEX | PCO# | FLMNH & Necropsy IDs | County  | Birth Year | Loss Year | Status on 4/1/2010 | Atrial Septal Defect | Number of Descended Testicles | Thoracic Cowlick | Tail tip Kink | Pedigree |      |  |
|--------------------------|-----|------|----------------------|---------|------------|-----------|--------------------|----------------------|-------------------------------|------------------|---------------|----------|------|--|
|                          |     |      |                      |         |            |           |                    |                      |                               |                  |               | Dam      | Sire |  |
| FP058                    | C   | M    | Pco-0536             | UF28802 | Collier    | 1994      | 1997               | Dead                 | No                            | 0                | Yes           | Yes      |      |  |
| FP059                    | C   | M    | Pco-0716             | UF31163 | Collier    | 1995      | 2004               | Dead                 | No                            | 2                | Yes           | No       |      |  |
| FP060                    | C   | M    | Pco-0539             |         | Collier    | 1995      | 2004               | Dead                 | Unk                           | 2                | Yes           | Yes      |      |  |
| FP061F1                  | H   | F    | Pco-0898             |         | Dade       | 1996      | 2003               | Radio failure        | Unk                           | na               | No            | No       |      |  |
| FP062                    | C   | M    | Pco-0718             |         | Polk       | 1996      | 2000               | Radio failure        | Unk                           | 1                | No            | Yes      |      |  |
| FP063                    | C   | M    | Pco-0719             | UF29819 | Co & He    | 1995      | 2000               | Dead                 | No                            | 1                | Yes           | Yes      |      |  |
| FP064                    | C   | M    | Pco-0721             | UF29532 |            | 1996      | 1999               | Dead                 | No                            | 1                | Yes           | Yes      |      |  |
| FP065 /K035F1            | H   | M    | Pco-0909             |         | Hendry     | 1996      |                    | Alive                | Alive                         | 2                | Yes           | No       |      |  |
| FP066 /K036F1            | H   | F    | Pco-0902             |         | Collier    | 1996      | 2000               | Radio failure        | Unk                           | na               | No            | No       |      |  |
| FP067                    | C   | F    | Pco-0722             | UF31011 | Hendry     | 1997      | 2003               | Dead                 | Yes                           | na               | Yes           | No       |      |  |
| FP068                    | C   | M    | Pco-0723             | UF29250 | Collier    | 1993      | 2000               | Dead                 | Unk                           | 2                | Yes           | Yes      |      |  |
| FP069                    | C   | F    | Pco-0901             | UF31182 | Collier    | 1997      | 2005               | Dead                 | No                            | na               | Yes           | Yes      |      |  |
| FP070 / K039             | H   | F    | Pco-0724             |         | Collier    | 1997      | 2006               | Dead                 | No                            | na               | No            | No       |      |  |
| FP071 / K038             | H   | F    | Pco-1095             |         | Collier    | 1997      | 2005               | Radio failure        | Unk                           | na               | No            | No       |      |  |
| FP072                    | C   | M    | Pco-0725             | UF29273 | Hendry     | 1995      | 1998               | Dead                 | No                            | 2                | Yes           | Yes      |      |  |
| FP073 /K018F1            | H   | F    | Pco-0903             |         | Hendry     | 1995      | 2003               | Dead                 | Unk                           | na               | Yes           | No       |      |  |
| FP074                    | H   | M    | Pco-0904             | UF29567 | He to GL   | 1997      | 1999               | Dead                 | Unk                           | 2                | Yes           | Yes      |      |  |
| FP075                    | C   | F    | Pco-0905             |         | Collier    | 1998      | 2006               | Radio failure        | Unk                           | na               | Yes           | Yes      |      |  |
| FP076                    | C   | M    | Pco-0906             | UF25908 | Collier    | 1997      | 1999               | Dead                 | Yes                           | 0                | Yes           | Yes      |      |  |
| FP077                    | H   | F    | Pco-0907             |         | Co & He    | 1997      | 2003               | Dead                 | Unk                           | na               | Yes           | No       |      |  |
| FP078                    | C   | F    | Pco-0908             | UF31021 | Collier    | 1997      | 2002               | Dead                 | No                            | na               | Yes           | Yes      |      |  |
| FP079 /K019F1            | H   | M    | Pco-0910             |         | Collier    | 1995      | 2006               | Captivity            | Unk                           | 2                | Yes           | No       |      |  |
| FP080                    | C   | F    | Pco-0960             | UF29826 | Hendry     | 1996      | 2000               | Dead                 | No                            | na               | Yes           | Yes      |      |  |
| FP081                    | C   | M    | Pco-0961             |         | Hendry     | 1996      | 2002               | Radio failure        | Unk                           | 1                | Yes           | Yes      |      |  |
| FP082                    | C   | F    | Pco-0962             | UF31026 | Hendry     | 1997      | 2003               | Dead                 | Unk                           | na               | Yes           | Yes      |      |  |
| FP083 /K62F1             | H   | F    | Pco-0914             |         | Collier    | 1999      | 2006               | Radio failure        | Unk                           | na               | No            | No       |      |  |
| FP084                    | H   | M    | Pco-0963             | UF25914 | He to Gl   | 1999      | 2000               | Dead                 | No                            | 2                | No            | No       |      |  |
| FP085 / K059             | H   | M    | Pco-0967             |         | Dade       | 1999      | 2004               | Dead                 | No                            | 2                | No            | No       |      |  |
| FP086 / K068             | H   | F    | Pco-0919             |         | Collier    | 1999      | 2003               | Dead                 | Unk                           | na               | No            | No       |      |  |
| FP087 / K060             | H   | F    | Pco-0968             |         | Collier    | 1999      | 2003               | Dead                 | Unk                           | na               | Yes           | No       |      |  |
| FP088 / K064             | H   | F    | Pco-0915             |         | Collier    | 1999      | 2002               | Radio failure        | Unk                           | na               | No            | No       |      |  |
| FP089                    | C   | M    | Pco-0969             | UF30064 | Collier    | 1997      | 2000               | Dead                 | Unk                           | 1                | Yes           | Yes      |      |  |
| FP090 / K067             | H   | M    | Pco-0918             | UF30178 | Co to PB   | 1999      | 2001               | Dead                 | Unk                           | 2                | No            | No       |      |  |
| FP091 / K066             | H   | F    | Pco-0917             | UF31101 | Collier    | 1999      | 2003               | Dead                 | Unk                           | na               | No            | No       |      |  |
| FP092 / K065             | H   | M    | Pco-0916             | UF30958 | Co & Le    | 1999      | 2001               | Dead                 | Unk                           | 2                | No            | No       |      |  |
| FP093 / K058             | H   | F    | Pco-0970             |         | Collier    | 1999      | 2007               | Radio failure        | Lost - RF                     | na               | No            | No       |      |  |
| FP094F1                  | H   | F    | Pco-0974             |         | Dade       | 1999      | 2007               | Radio failure        | Lost - RF                     | na               | No            | No       |      |  |
| FP095 /K045F1            | H   | F    | Pco-0982             |         | Dade       | 1998      | 2008               | Radio failure        | Lost - RF                     | na               | No            | No       |      |  |
| FP096 / K080             | H   | M    | Pco-0972             | UF30938 | Collier    | 2000      | 2002               | Dead                 | No                            | 2                | Yes           | Yes      |      |  |
| FP097                    | C   | M    | Pco-0987             | UF30431 | Collier    | 2000      | 2001               | Dead                 | No                            | 2                | No            | Yes      |      |  |
| FP098                    | C   | M    | Pco-0989             | UF30948 | Collier    | 1998      | 2002               | Dead                 | No                            | 1                | Yes           | Yes      |      |  |
| FP099                    | C   | M    | Pco-0990             |         | Collier    | 2000      | 2002               | Dead                 | No                            | 2                | Yes           | Yes      |      |  |
| FP100                    | C   | M    | Pco-0991             |         | Co & He    | 1997      | 2007               | Dead                 | Unk                           | 1                | No            | Yes      |      |  |
| FP101                    | C   | F    | Pco-0992             |         | Co & He    | 1999      | 2003               | Radio failure        | Unk                           | na               | Yes           | Yes      |      |  |
| FP102 / K048             | H   | F    | Pco-0996             |         | Collier    | 1998      | 2007               | Radio failure        | Unk                           | na               | No            | No       |      |  |
| FP103                    | H   | F    | Pco-0997             |         | Collier    | 2000      | 2007               | Dead                 | Unk                           | na               | No            | No       |      |  |
| FP104                    | H   | M    | Pco-1000             |         | Collier    | 2000      | 2006               | Dead                 | No                            | 2                | No            | No       |      |  |
| FP105                    | C   | F    | Pco-0956             | UF30434 | Collier    | 1994      | 2002               | Dead                 | Unk                           | na               | Yes           | Yes      |      |  |
| FP106                    | C   | F    | Pco-1002             | UF31018 | Collier    | 2000      | 2003               | Dead                 | Unk                           | na               | No            | Yes      |      |  |
| FP107 / K079             | H   | F    | Pco-0971             |         | Collier    | 2000      | 2008               | Dead                 | No                            | na               | Yes           | Yes      |      |  |
| FP108 / K090             | H   | M    | Pco-0994             | UF31020 | Collier    | 2001      | 2002               | Dead                 | No                            | 2                | Yes           | No       |      |  |
| FP109                    | C   | M    | Pco-1022             | UF31183 | Hendry     | 1992      | 2003               | Dead                 | No                            | 1                | Yes           | Unk      |      |  |
| FP110 / K086             | H   | F    | Pco-0984             |         | Hendry     | 2000      |                    | Alive                | Alive                         | na               | Yes           | No       |      |  |
| FP111                    | C   | M    | Pco-1023             | UF30957 | Hendry     | 1992      | 2002               | Dead                 | No                            | 1                | No            | Yes      |      |  |
| FP112                    | C   | F    | Pco-1024             |         | Collier    | 1998      | 2002               | Dead                 | No                            | na               | Yes           | Yes      |      |  |
| FP113                    | C   | F    | Pco-1037             |         | Collier    | 2002      |                    | Alive                | Alive                         | na               | Yes           | Yes      |      |  |
| FP114                    | C   | M    | Pco-1038             | UF31110 | Collier    | 2002      | 2003               | Dead                 | No                            | 1                | Unk           | Yes      |      |  |
| FP115                    | C   | F    | Pco-1058             | UF31165 | Hendry     | 1998      | 2003               | Dead                 | No                            | na               | No            | Yes      |      |  |

Table S2

**DEMOGRAPHIC INFORMATION**

**TRAITS**

**PEDIGREE**

| Field ID & Genetic group | SEX | PCO# | FLMNH & Necropsy IDs | County | Birth Year | Loss Year | Status on 4/1/2010 | Atrial Septal Defect | Number of Descended Testicles | Thoracic Cowlick | Tail tip Kink | Pedigree |      |  |
|--------------------------|-----|------|----------------------|--------|------------|-----------|--------------------|----------------------|-------------------------------|------------------|---------------|----------|------|--|
|                          |     |      |                      |        |            |           |                    |                      |                               |                  |               | Dam      | Sire |  |
| FP116                    | C   | F    | Pco-1051             |        | Hendry     | 2002      | 2007               | Dead                 | No                            | na               | Yes           | Yes      |      |  |
| FP117                    | H   | M    | Pco-1059             |        | Hendry     | 2002      | 2004               | Dead                 | No                            | 2                | No            | No       |      |  |
| FP118                    | H   | F    | Pco-1060             |        | Hendry     | 2002      | 2003               | Dead                 | No                            | na               | Yes           | No       |      |  |
| FP119 / K115             | H   | M    | Pco-1064             |        | Collier    | 2002      |                    | Alive                | Alive                         | 2                | No            | No       |      |  |
| FP120                    | H   | F    | Pco-1065             |        | Collier    | 2000      | 2005               | Dead                 | No                            | na               | No            | No       |      |  |
| FP121                    | H   | F    | Pco-1085             |        | Hendry     | 2001      | 2006               | Radio failure        | Unk                           | na               | No            | No       |      |  |
| FP122                    | C   | F    | Pco-1087             |        | Hendry     | 2001      | 2004               | Dead                 | No                            | na               | Yes           | Yes      |      |  |
| FP123                    | H   | M    | Pco-1088             |        | Hendry     | 2000      | 2004               | Dead                 | No                            | 2                | Yes           | No       |      |  |
| FP124                    | H   | F    | Pco-1091             |        | Collier    | 2000      | 2008               | Radio failure        | Unk                           | na               | No            | No       |      |  |
| FP125                    | H   | M    | Pco-1092             |        | Co & Da    | 2003      | 2006               | Radio failure        | Unk                           | 2                | No            | No       |      |  |
| FP126                    | H   | M    | Pco-1093             |        | Co & He    | 2003      | 2005               | Dead                 | No                            | 2                | No            | No       |      |  |
| FP127                    | H   | M    | Pco-1094             |        | Collier    | 2002      | 2007               | Dead                 | No                            | 2                | No            | No       |      |  |
| FP128 / K082             | H   | F    | Pco-0977             |        | Hendry     | 2000      | 2007               | Dead                 | Unk                           | na               | Yes           | No       |      |  |
| FP129 / K089             | H   | F    | Pco-0993             |        | Collier    | 2001      | 2006               | Dead                 | Yes                           | na               | No            | No       |      |  |
| FP130 / K150             | H   | M    | Pco-1071             |        | Orange     | 2003      | 2007               | Dead                 | No                            | 2                | No            | Yes      |      |  |
| FP131                    | H   | M    | Pco-1097             |        | Collier    | 1999      | 2008               | Dead                 | No                            | 2                | No            | No       |      |  |
| FP132                    | H   | M    | Pco-1098             |        | Hendry     | 2001      | 2004               | Dead                 | No                            | 2                | No            | No       |      |  |
| FP133                    | H   | M    | Pco-1123             |        | Collier    | 2000      |                    | Alive                | Unk                           | 2                | No            | Yes      |      |  |
| FP134                    | H   | M    | Pco-1124             |        | Collier    | 2002      | 2007               | Dead                 | Unk                           | 2                | Yes           | Yes      |      |  |
| FP135 / K147             | H   | M    | Pco-1067             |        | Collier    | 2003      | 2006               | Dead                 | No                            | 2                | No            | Yes      |      |  |
| FP136                    | H   | F    | Pco-1125             |        | Collier    | 2001      | 2005               | Dead                 | No                            | na               | No            | No       |      |  |
| FP137                    | H   | M    | Pco-1126             |        | Hendry     | 2002      | 2007               | Radio failure        | Lost - RF                     | 2                | No            | No       |      |  |
| FP138                    | H   | M    | Pco-1127             |        | Co & He    | 2001      | 2008               | Dead                 | No                            | 2                | No            | Yes      |      |  |
| FP139                    | C   | M    | Pco-1048             |        | Hendry     | 2002      | 2005               | Radio failure        | Unk                           | 1                | Yes           | Yes      |      |  |
| FP140                    | H   | F    | Pco-1166             |        | Collier    | 2002      | 2009               | Dead                 | Unk                           | na               | No            | Yes      |      |  |
| FP141                    | H   | M    | Pco-1167             |        | Co & He    | 2002      |                    | Alive                | Alive                         | 2                | No            | No       |      |  |
| FP142                    | H   | F    | Pco-1168             |        | Dade       | 2003      | 2007               | Radio failure        | Lost - RF                     | na               | No            | No       |      |  |
| FP143                    | H   | M    | Pco-1169             |        | Hendry     | 2004      | 2007               | Radio failure        | Lost - RF                     | 2                | No            | No       |      |  |
| FP144                    | H   | M    | Pco-1170             |        | Collier    | 2004      | 2007               | Radio failure        | Lost - RF                     | 2                | No            | No       |      |  |
| FP145                    | H   | F    | Pco-1171             |        | Collier    | 2004      | 2007               | Radio failure        | Lost - RF                     | na               | No            | No       |      |  |
| FP146                    | H   | M    | Pco-1174             |        | Collier    | 2003      | 2008               | Radio failure        | Lost - RF                     | 2                | No            | No       |      |  |
| FP147 / K184             | H   | M    | Pco-1150             |        | Collier    | 2005      | 2007               | Radio failure        | Lost - RF                     | 2                | Yes           | No       |      |  |
| FP148                    | H   | F    | Pco-1193             |        | Collier    | 2003      | 2007               | Radio failure        | Lost - RF                     | na               | No            | No       |      |  |
| FP149                    | H   | F    | Pco-1233             |        | Collier    | 2004      | 2007               | Radio failure        | Lost - RF                     | na               | Yes           | No       |      |  |
| FP150 / K152             | H   | F    | Pco-1079             |        | Collier    | 2003      | 2008               | Radio failure        | Lost - RF                     | na               | No            | No       |      |  |
| FP151 / K113             | H   | F    | Pco-1031             |        | Collier    | 2002      | 2008               | Radio failure        | Lost - RF                     | na               | Unk           | No       |      |  |
| FP152                    | H   | M    | Pco-1238             |        | Collier    | 2002      | 2008               | Dead                 | No                            | 2                | No            | Yes      |      |  |
| FP153                    | H   | F    | Pco-1239             |        | Collier    | 2001      |                    | Alive                | Alive                         | na               | No            | No       |      |  |
| FP154                    | H   | M    | Pco-1240             |        | Collier    | 2004      | 2008               | Radio failure        | Lost - RF                     | 1                | No            | Yes      |      |  |
| FP155                    | H   | M    | Pco-1292             |        | Hendry     | 2005      | 2008               | Dead                 | Unk                           | 2                | No            | No       |      |  |
| FP156                    | H   | M    | Pco-1293             |        | Collier    | 2005      | 2008               | Radio failure        | Lost - RF                     | 2                | No            | No       |      |  |
| FP157                    | H   | M    | Pco-1294             |        | Lee        | 2004      | 2008               | Dead                 | Unk                           | 2                | No            | Yes      |      |  |
| FP158                    | H   | F    | Pco-1295             |        | Collier    | 2005      |                    | Alive                | Alive                         | na               | Yes           | Yes      |      |  |
| FP159                    | H   | M    | Pco-1296             |        | Lee        | 2002      | 2009               | Radio failure        | Lost - RF                     | 1                | Yes           | No       |      |  |
| FP160                    | C   | F    | Pco-1297             |        | Lee        | 2003      | 2008               | Radio failure        | Lost - RF                     | na               | Yes           | Yes      |      |  |
| FP161 / K169             | H   | F    | Pco-1115             |        | Collier    | 2004      |                    | Alive                | Alive                         | na               | Unk           | No       |      |  |
| FP162                    | U   | F    | Pco-1298             |        | Collier    | 2005      |                    | Alive                | Alive                         | na               | No            | No       |      |  |
| FP163 / K227             | H   | M    | Pco-1242             |        | Collier    | 2007      | 2008               | Radio failure        | Lost - RF                     | 2                | No            | No       |      |  |
| FP164                    | U   | M    | Pco-1299             |        | Collier    | 2006      | 2008               | Dead                 | Unk                           | 2                | No            | No       |      |  |
| FP165                    | U   | M    | Pco-1327             |        | Hendry     | 2007      | 2009               | Radio failure        | Alive                         | 2                | No            | No       |      |  |
| FP166                    | U   | M    | Pco-1334             |        | Hendry     | 2004      | 2009               | Dead                 |                               | 2                | No            | No       |      |  |
| FP167                    | U   | M    | Pco-1335             |        | Hendry     | 2006      | 2009               | Radio failure        | Alive                         | 2                | No            | Yes      |      |  |
| FP168                    | U   | F    | Pco-1336             |        | Lee        | 2002      |                    | Alive                | Alive                         | na               | No            | Yes      |      |  |
| FP169                    | U   | M    | Pco-1337             |        | Collier    | 2004      |                    | Alive                | Alive                         | 2                | No            | Yes      |      |  |
| FP170                    | U   | F    | Pco-1341             |        | Collier    | 2006      |                    | Alive                | Alive                         | na               | Yes           | No       |      |  |
| FP171                    | U   | U    | Pco-1342             |        | Collier    | 2006      |                    | Alive                | Alive                         | 2                | No            | No       |      |  |
| FP172                    | U   | F    | Pco-1367             |        | Collier    | 2005      | 2010               | Dead                 | Unk                           | TBD              | TBD           | TBD      |      |  |
| FP173                    | U   | M    | Pco-1370             |        | Lee        | 2006      |                    | Alive                | Unk                           | TBD              | TBD           | TBD      |      |  |

Table S2

**DEMOGRAPHIC INFORMATION**

**TRAITS**

**PEDIGREE**

| Field ID & Genetic group | SEX | PCO# | FLMNH & Necropsy IDs | County               | Birth Year | Loss Year | Status on 4/1/2010 | Atrial Septal Defect | Number of Descended Testicles | Thoracic Cowlick | Tail tip Kink | Pedigree |      |  |
|--------------------------|-----|------|----------------------|----------------------|------------|-----------|--------------------|----------------------|-------------------------------|------------------|---------------|----------|------|--|
|                          |     |      |                      |                      |            |           |                    |                      |                               |                  |               | Dam      | Sire |  |
| FP174                    | J   | M    | Pco-1371             |                      | Collier    | 2005      | 2010               | Dead                 | Unk                           | TBD              | TBD           | TBD      |      |  |
| FP175 / K254             | H   | F    | Pco-1281             |                      |            | 2007      |                    | Alive                | Unk                           | na               | Unk           | Unk      |      |  |
| FP176                    | J   | M    | Pco-1372             |                      | Hendry     | 2006      |                    | Alive                | Unk                           | TBD              | TBD           | TBD      |      |  |
| FP177 / K235             | H   | M    | Pco-1248             |                      | Collier    | 2007      |                    | Alive                | Unk                           | 2                | No            | No       |      |  |
| FP178                    | J   | F    | Pco-1374             |                      | Collier    | 2007      |                    | Alive                | Unk                           | TBD              | TBD           | TBD      |      |  |
| FP179                    | J   | M    | Pco-1375             |                      |            | 2005      |                    | Alive                | Unk                           | TBD              | TBD           | TBD      |      |  |
| FP180 / K264             | H   | F    | Pco-1300             |                      |            | 2008      |                    | Alive                | Unk                           | na               | Unk           | Unk      |      |  |
| FP181 / K093             | H   | M    | Pco-0999             |                      |            | 2001      |                    | Alive                | Unk                           | Unk              | Unk           | Unk      |      |  |
| FP182 / K279             | H   | F    | Pco-1340             |                      |            | 2009      |                    | Alive                | Unk                           | Unk              | Unk           | Unk      |      |  |
| FP200 "Big Guy"          | E   | M    | Pco-0010             |                      | Collier    | 1982      | 1984               | Captivity            | No                            | 2                | Yes           | Yes      |      |  |
| FP201                    | C   | M    | Pco-0186             |                      | Collier    | 1990      | 1991               | Captivity            | No                            | 1                | Yes           | Yes      |      |  |
| FP202                    | E   | M    | Pco-0187             |                      | Collier    | 1990      | 1991               | Captivity            | Unk                           | 2                | No            | No       |      |  |
| FP203                    | E   | M    | Pco-0188             |                      | Collier    | 1990      | 1991               | Captivity            | No                            | 2                | Yes           | Yes      |      |  |
| FP204                    | C   | F    | Pco-0189             |                      |            | 1990      | 1991               | Captivity            | Yes                           | na               | Yes           | No       |      |  |
| FP205                    | C   | F    | Pco-0190             |                      | Collier    | 1990      | 1991               | Captivity            | Yes                           | na               | Yes           | Yes      |      |  |
| FP206                    | C   | F    | Pco-0191             |                      | Collier    | 1990      | 1991               | Captivity            | No                            | na               | Yes           | No       |      |  |
| FP207                    | C   | M    | Pco-0427             |                      | Collier    | 1991      | 1992               | Captivity            | Unk                           | 0                | Yes           | Yes      |      |  |
| FP208                    | C   | F    | Pco-0429             |                      | Collier    | 1992      | 1992               | Captivity            | Unk                           | na               | Yes           | Yes      |      |  |
| FP209                    | E   | F    | Pco-0502             |                      | Collier    | 1992      | 1992               | Captivity            | Unk                           | na               | No            | Yes      |      |  |
| FP210                    | E   | M    | Pco-0503             |                      | Collier    | 1992      | 1992               | Captivity            | No                            | 2                | No            | No       |      |  |
| UCFP002                  | C   | M    | Pco-0050             | UF14390 G78-65       | Dade       | 1975      | 1978               | Dead                 | Unk                           | Unk              | Yes           | Yes      |      |  |
| UCFP003                  | C   | M    | Pco-0225             | UF24160              | Collier    | 1976      | 1979               | Dead                 | Unk                           | Unk              | Unk           | Yes      |      |  |
| UCFP004                  | C   | F    | Pco-0941             | UF11915 G80-4        | Collier    | 1978      | 1979               | Dead                 | Unk                           | na               | Yes           | Yes      |      |  |
| UCFP005                  | C   | M    | Pco-0051             | UF11927 G80-15       | Collier    | 1978      | 1980               | Dead                 | Unk                           | Unk              | Yes           | Yes      |      |  |
| UCFP006                  | C   | F    | Pco-0183             | UF10424 G81-19       | Collier    | 1979      | 1981               | Dead                 | Unk                           | na               | No            | Yes      |      |  |
| UCFP007                  | C   | U    | Pco-0223             | UF10460              | Collier    | 1981      | 1981               | Dead                 | Unk                           | Unk              | Unk           | Unk      |      |  |
| UCFP008                  | E   | M    | Pco-0087             | G83-75 "James Billy" | Hendry     | 1980      | 1983               | Dead                 | Unk                           | Unk              | Yes           | Unk      |      |  |
| UCFP009                  | C   | M    | Pco-0047             | UF18944 G83-22       | Glades     | 1981      | 1983               | Dead                 | Unk                           | 2                | Yes           | Yes      |      |  |
| UCFP010                  | U   | F    | Pco-0226             | UF19077              | P Beach    | 1979      | 1983               | Dead                 | Unk                           | na               | No            | No       |      |  |
| UCFP011                  | U   | F    | Pco-0046             | UF23985 G84-20       | P Beach    | 1982      | 1984               | Dead                 | Unk                           | na               | No            | No       |      |  |
| UCFP012                  | C   | F    | Pco-0052             | UF20958 G84-26       | Collier    | 1975      | 1984               | Dead                 | Unk                           | na               | Unk           | Yes      |      |  |
| UCFP013                  | C   | F    | Pco-0944             | UF20957              | Collier    | 1983      | 1985               | Dead                 | Unk                           | na               | Unk           | Yes      |      |  |
| UCFP014                  | C   | F    | Pco-0945             | UF20973              | Collier    | 1983      | 1985               | Dead                 | Unk                           | na               | Unk           | Unk      |      |  |
| UCFP015                  | C   | F    | Pco-0059             | UF24268              | Collier    | 1982      | 1986               | Dead                 | Unk                           | na               | Yes           | Yes      |      |  |
| UCFP017                  | C   | M    | Pco-0946             | UF24042              | Volusia    | 1978      | 1987               | Dead                 | Unk                           | Unk              | Unk           | Unk      |      |  |
| UCFP018                  | C   | M    | Pco-0158             | N89-64               | Collier    | 1986      | 1989               | Dead                 | No                            | 1                | Yes           | Yes      |      |  |
| UCFP019                  | C   | M    | Pco-0185             | 383                  | Collier    | 1989      | 1990               | Dead                 | Unk                           | 1                | Yes           | Yes      |      |  |
| UCFP020                  | C   | F    | Pco-0192             | UF25922              | Collier    | 1990      | 1991               | Dead                 | Yes                           | na               | Yes           | Yes      |      |  |
| UCFP021                  | C   | F    | Pco-0488             | 742                  | Collier    | 1992      | 1992               | Dead                 | No                            | na               | Yes           | Yes      |      |  |
| UCFP022                  | C   | M    | Pco-0947             | 726                  | Collier    | 1991      | 1993               | Dead                 | No                            | 2                | Yes           | Yes      |      |  |
| UCFP023                  | C   | M    | Pco-0948             | 94                   | Co & He    | 1993      | 1994               | Dead                 | Unk                           | 1                | No            | Yes      |      |  |
| UCFP024                  | C   | F    | No DNA               |                      | Collier    | 1996      | 1996               | Dead                 | No                            | na               | Unk           | Unk      |      |  |
| UCFP025                  | C   | F    | Pco-0949             | UF29199              | Collier    | 1996      | 1998               | Dead                 | No                            | na               | Unk           | Unk      |      |  |
| UCFP026                  | C   | M    | Pco-0950             | UF29242              | Collier    | 1994      | 1998               | Dead                 | No                            | 2                | No            | Yes      |      |  |
| UCFP027                  | C   | F    | Pco-0726             | UF30433              | Hendry     | 1997      | 1999               | Dead                 | No                            | na               | No            | Yes      |      |  |
| UCFP028                  | C   | M    | Pco-0951             | UF9789               | Glades     | 1969      | 1972               | Dead                 | Unk                           | Unk              | Unk           | Unk      |      |  |
| UCFP029                  | C   | M    | Pco-1019             | UF30430              | Hendry     | 1992      | 1996               | Dead                 | No                            | 1                | Yes           | Yes      |      |  |
| UCFP030                  | J   | F    | Pco-0952             | UF28713              | Collier    | 1995      | 1996               | Dead                 | No                            | na               | No            | No       |      |  |
| UCFP031                  | C   | U    | Pco-0953             | UF29261              | Collier    | 1995      | 1997               | Dead                 | Unk                           | Unk              | Unk           | Unk      |      |  |
| UCFP032                  | J   | U    | No DNA               |                      |            | unk       |                    | Dead                 | Unk                           | Unk              | Unk           | Unk      |      |  |
| UCFP033                  | H   | M    | Pco-0934             | UF29566              | Hendry     | 1999      | 1999               | Dead                 | No                            | 1                | No            | No       |      |  |
| UCFP034                  | H   | M    | Pco-0973             | UF23849              | Hendry     | 1998      | 2000               | Dead                 | Yes                           | 2                | No            | No       |      |  |
| UCFP035                  | C   | M    | Pco-0975             | UF30022              | Collier    | 1998      | 2000               | Dead                 | No                            | 1                | Yes           | Yes      |      |  |
| UCFP036                  | H   | F    | Pco-0979             | UF30023              | Collier    | 1998      | 2000               | Dead                 | No                            | na               | Yes           | Yes      |      |  |
| UCFP037                  | H   | F    | Pco-0983             |                      | Collier    | 1995      | 2000               | Dead                 | No                            | na               | No            | Yes      |      |  |
| UCFP038                  | H   | F    | Pco-1003             | UF30367              | Hendry     | 1999      | 2001               | Dead                 | No                            | na               | Yes           | No       |      |  |
| UCFP039                  | H   | F    | Pco-1004             | UF30366              | Collier    | 2000      | 2001               | Dead                 | No                            | na               | No            | Yes      |      |  |
| UCFP040                  | H   | M    | Pco-1005             | UF30398              | Collier    | 2000      | 2001               | Dead                 | No                            | 2                | Yes           | Yes      |      |  |

Table S2

**DEMOGRAPHIC INFORMATION**

**TRAITS**

**PEDIGREE**

| Field ID & Genetic group | SEX | PCO# | FLMNH & Necropsy IDs | County  | Birth Year | Loss Year | Status on 4/1/2010 | Atrial Septal Defect | Number of Descended Testicles | Thoracic Cowlick | Tail tip Kink | Pedigree |      |  |
|--------------------------|-----|------|----------------------|---------|------------|-----------|--------------------|----------------------|-------------------------------|------------------|---------------|----------|------|--|
|                          |     |      |                      |         |            |           |                    |                      |                               |                  |               | Dam      | Sire |  |
| UCFP041                  | H   | M    | Pco-1006             | UF30399 | Collier    | 1999      | 2001               | Dead                 | No                            | 1                | Unk           | Yes      |      |  |
| UCFP042                  | H   | F    | Pco-1082             | UF30959 | Co & He    | 1998      | 2001               | Dead                 | Unk                           | na               | Unk           | Unk      |      |  |
| UCFP043                  | H   | M    | Pco-1016             | UF30374 | Co & He    | 1999      | 2001               | Dead                 | No                            | 2                | No            | Yes      |      |  |
| UCFP044                  | C   | U    | Pco-1020             |         |            | 1996      | 1996               | Dead                 | Unk                           | Unk              | Unk           | Unk      |      |  |
| UCFP045                  | C   | M    | Pco-1028             | UF30937 | Glades     | 1999      | 2002               | Dead                 | No                            | 1                | No            | Yes      |      |  |
| UCFP046                  | H   | M    | Pco-1029             | UF30936 | Collier    | 2001      | 2002               | Dead                 | No                            | 1                | Yes           | No       |      |  |
| UCFP047                  | C   | U    | Pco-1045             |         | Hendry     | <1950     | 1954               | Dead                 | Unk                           | Unk              | Unk           | Unk      |      |  |
| UCFP048                  | H   | F    | Pco-1078             | UF31012 | Hendry     | 2002      | 2002               | Dead                 | No                            | na               | No            | No       |      |  |
| UCFP049 /K98             | H   | F    | Pco-1007             | UF31019 | Hendry     | 2001      | 2002               | Dead                 | No                            | na               | Yes           | No       |      |  |
| UCFP050                  | C   | M    | Pco-0958             | UF31024 | Co & Le    | 1996      | 2003               | Dead                 | No                            | 1                | Yes           | Yes      |      |  |
| UCFP051                  | H   | M    | Pco-1061             |         | Co to Hil  | 2001      | 2003               | Dead                 | No                            | 2                | Yes           | No       |      |  |
| UCFP052                  | U   | M    | Pco-1069             | UF31010 | Hendry     | 1999      | 2003               | Dead                 | No                            | 2                | Unk           | No       |      |  |
| UCFP053                  | H   | F    | Pco-1083             | UF31025 | Collier    | 2000      | 2003               | Dead                 | Unk                           | na               | Unk           | Yes      |      |  |
| UCFP054                  | C   | M    | Pco-1070             | UF31022 | Collier    | 2002      | 2003               | Dead                 | Yes                           | 1                | Yes           | Yes      |      |  |
| UCFP055                  | H   | M    | Pco-1074             |         | Hendry     | 2002      | 2003               | Dead                 | Unk                           | 2                | Unk           | No       |      |  |
| UCFP056                  | H   | M    | Pco-1075             |         | Hendry     | 2002      | 2003               | Dead                 | Unk                           | 2                | Unk           | Yes      |      |  |
| UCFP057                  | H   | F    | Pco-1076             |         | Hendry     | 1998      | 2003               | Dead                 | No                            | na               | No            | No       |      |  |
| UCFP058                  | C   | F    | Pco-1084             | UF31023 | Co & Le    | 2002      | 2003               | Dead                 | No                            | na               | No            | No       |      |  |
| UCFP059                  | H   | M    | Pco-1214             |         | Collier    | 2003      | 2003               | Dead                 | No                            | 2                | No            | Yes      |      |  |
| UCFP060                  | H   | M    | Pco-1086             |         | Collier    | 2001      | 2003               | Dead                 | No                            | 2                | No            | No       |      |  |
| UCFP061                  | H   | F    | Pco-1215             |         | Hendry     | 2001      | 2003               | Dead                 | No                            | na               | Yes           | No       |      |  |
| UCFP062                  | H   | F    | Pco-1216             | UF31108 | Collier    | 2003      | 2004               | Dead                 | No                            | na               | No            | No       |      |  |
| UCFP063                  | C   | M    | Pco-1096             | UF31162 | Collier    | 2000      | 2004               | Dead                 | No                            | 1                | No            | Yes      |      |  |
| UCFP064                  | H   | U    | Pco-1102             |         |            | 2000      | 2004               | Dead                 | Unk                           | Unk              | Unk           | Unk      |      |  |
| UCFP065                  | H   | M    | Pco-1103             | UF31109 | Collier    | 2002      | 2004               | Dead                 | No                            | 2                | No            | Yes      |      |  |
| UCFP066                  | H   | M    | Pco-1116             | UF31103 | Collier    | 2001      | 2004               | Dead                 | No                            | 2                | Yes           | Yes      |      |  |
| UCFP067                  | H   | F    | Pco-1144             |         | Collier    | 2004      | 2004               | Dead                 | Unk                           | na               | Unk           | Unk      |      |  |
| UCFP068                  | H   | F    | Pco-1128             |         | Collier    | 2000      | 2004               | Dead                 | Unk                           | na               | No            | No       |      |  |
| UCFP069                  | H   | F    | Pco-1122             | UF31161 | Collier    | 2002      | 2004               | Dead                 | No                            | na               | Yes           | Yes      |      |  |
| UCFP070                  | H   | F    | Pco-1194             |         | Collier    | 2003      | 2004               | Dead                 | No                            | na               | No            | No       |      |  |
| UCFP071                  | H   | M    | Pco-1195             |         | Collier    | 2002      | 2005               | Dead                 | No                            | 2                | No            | No       |      |  |
| UCFP072                  | H   | M    | Pco-1196             |         | Collier    | 2003      | 2005               | Dead                 | No                            | Unk              | Yes           | No       |      |  |
| UCFP073                  | H   | M    | Pco-1197             |         | Collier    | 2004      | 2005               | Dead                 | Unk                           | 2                | No            | No       |      |  |
| UCFP074                  | H   | M    | Pco-1198             |         | Flagler    | 2002      | 2005               | Dead                 | No                            | 2                | Unk           | No       |      |  |
| UCFP075                  | H   | M    | Pco-1199             |         | Collier    | 2003      | 2005               | Dead                 | No                            | 2                | Yes           | Yes      |      |  |
| UCFP076                  | H   | M    | Pco-1200             |         | Collier    | 2004      | 2005               | Dead                 | No                            | 2                | Yes           | Yes      |      |  |
| UCFP077                  | H   | F    | Pco-1201             |         | Hendry     | 2003      | 2006               | Dead                 | No                            | na               | No            | No       |      |  |
| UCFP078                  | H   | M    | Pco-1202             |         | Collier    | 2005      | 2006               | Dead                 | No                            | 2                | No            | Yes      |      |  |
| UCFP079                  | H   | F    | Pco-1203             |         | Collier    | 2004      | 2006               | Dead                 | No                            | na               | No            | No       |      |  |
| UCFP080                  | H   | F    | Pco-1217             |         | Dade       | 2004      | 2006               | Dead                 | No                            | na               | No            | No       |      |  |
| UCFP081                  | H   | M    | Pco-1204             |         | Lee        | 2004      | 2006               | Dead                 | Unk                           | 2                | No            | No       |      |  |
| UCFP082                  | U   | M    | No DNA               |         | Hendry     | unk       | 2006               | Dead                 | Unk                           | Unk              | Unk           | Unk      |      |  |
| UCFP083                  | H   | M    | Pco-1205             |         | Lee        | 2003      | 2006               | Dead                 | Unk                           | 2                | No            | No       |      |  |
| UCFP084                  | H   | M    | Pco-1206             |         | Orange     | 2002      | 2006               | Dead                 | Unk                           | 2                | No            | No       |      |  |
| UCFP085                  | H   | M    | Pco-1207             |         | Hendry     | 2003      | 2006               | Dead                 | No                            | 2                | No            | No       |      |  |
| UCFP086                  | U   | M    | Pco-1210             |         | Collier    | unk       | 2006               | Dead                 | Unk                           | Unk              | Unk           | Unk      |      |  |
| UCFP087                  | H   | M    | Pco-1226             | G89-64  | Lee        | 2004      | 2006               | Dead                 | No                            | 2                | No            | No       |      |  |
| UCFP088                  | H   | F    | Pco-1271             |         | Collier    | 2004      | 2006               | Dead                 | No                            | na               | No            | No       |      |  |
| UCFP089                  | H   | M    | Pco-1272             |         | Co & He    | 2002      | 2006               | Dead                 | No                            | 2                | Yes           | Yes      |      |  |
| UCFP090                  | H   | F    | Pco-1237             |         | Hendry     | 2006      | 2007               | Dead                 | Yes                           | na               | No            | No       |      |  |
| UCFP091                  | H   | M    | Pco-1273             |         | Hendry     | 2006      | 2007               | Dead                 | Yes                           | 2                | No            | Yes      |      |  |
| UCFP092                  | H   | M    | Pco-1251             |         | Collier    | 2005      | 2007               | Dead                 | No                            | 2                | Unk           | No       |      |  |
| UCFP093                  | H   | M    | Pco-1250             |         | Lee        | 2005      | 2007               | Dead                 | No                            | 1                | No            | No       |      |  |
| UCFP094                  | H   | M    | Pco-1274             |         | Collier    | 2004      | 2007               | Dead                 | No                            | 2                | No            | No       |      |  |
| UCFP095                  | H   | M    | Pco-1275             |         | Polk       | 2004      | 2007               | Dead                 | No                            | 2                | No            | No       |      |  |
| UCFP096                  | H   | F    | Pco-1276             |         | Dade       | 2004      | 2007               | Dead                 | No                            | na               | Yes           | No       |      |  |
| UCFP097                  | H   | F    | Pco-1269             |         | Lee        | 2002      | 2007               | Dead                 | Yes                           | na               | No            | No       |      |  |
| UCFP098                  | H   | M    | Pco-1277             |         | Collier    | 2005      | 2007               | Dead                 | No                            | 1                | No            | No       |      |  |

Table S2

**DEMOGRAPHIC INFORMATION**

**TRAITS**

**PEDIGREE**

| Field ID & Genetic group | SEX | PCO# | FLMNH & Necropsy IDs | County   | Birth Year | Loss Year | Status on 4/1/2010 | Atrial Septal Defect | Number of Descended Testicles | Thoracic Cowlick | Tail tip Kink | Pedigree |      |  |
|--------------------------|-----|------|----------------------|----------|------------|-----------|--------------------|----------------------|-------------------------------|------------------|---------------|----------|------|--|
|                          |     |      |                      |          |            |           |                    |                      |                               |                  |               | Dam      | Sire |  |
| UCFP099                  | H   | M    | Pco-1278             |          | Lee        | 2006      | 2007               | Dead                 | No                            | 2                | Yes           | Yes      |      |  |
| UCFP100                  | H   | M    | Pco-1311             |          | Collier    | 2005      | 2007               | Dead                 | No                            | 2                | No            | Yes      |      |  |
| UCFP101                  | H   | M    | Pco-1279             |          | Dade       | 2003      | 2007               | Dead                 | No                            | 2                | No            | Unk      |      |  |
| UCFP102                  | H   | M    | Pco-1312             |          | Collier    | 2005      | 2007               | Dead                 | No                            | 2                | Yes           | No       |      |  |
| UCFP103                  | H   | M    | Pco-1288             |          | Collier    | 2005      | 2008               | Dead                 | No                            | 2                | No            | No       |      |  |
| UCFP104                  | H   | F    | Pco-1303             |          | Collier    | 2006      | 2008               | Dead                 | No                            | na               | Yes           | No       |      |  |
| UCFP105                  | J   | F    | Pco-1313             |          | Collier    | 2002      | 2008               | Dead                 | Unk                           | na               | Unk           | Unk      |      |  |
| UCFP106                  | H   | M    | Pco-1314             |          | Lee        | 2006      | 2008               | Dead                 | Yes                           | 1                | No            | Yes      |      |  |
| UCFP107                  | H   | F    | Pco-1306             |          | Collier    | 2005      | 2008               | Dead                 | No                            | na               | No            | No       |      |  |
| UCFP108                  | J   | F    | No DNA               |          | Collier    | 2005      | 2008               | Dead                 | No                            | na               | No            | No       |      |  |
| UCFP109                  | J   | M    | No DNA               |          | Collier    | 2000      | 2008               | Dead                 | Unk                           | Unk              | Unk           | No       |      |  |
| UCFP110                  | J   | F    | Pco-1324             |          | Dade       | 2008      | 2008               | Dead                 | No                            | na               | No            | No       |      |  |
| UCFP111                  | H   | F    | Pco-1325             |          | Collier    | 2008      | 2008               | Dead                 | No                            | na               | No            | Yes      |      |  |
| UCFP112                  | H   | M    | Pco-1326             |          | P Beach    | 2006      | 2008               | Dead                 | No                            | 2                | No            | No       |      |  |
| UCFP113                  | J   | M    | No DNA               |          | Lee        | 2004      | 2008               | Dead                 | No                            | 2                | No            | Yes      |      |  |
| UCFP114                  | C   | F    | Pco-1329             |          | Collier    | 2004      | 2008               | Dead                 | No                            | na               | No            | No       |      |  |
| UCFP115                  | J   | M    | Pco-1331             |          | Hendry     | 2005      | 2009               | Dead                 | No                            | 2                | No            | Yes      |      |  |
| UCFP116                  | J   | F    | Pco-1333             |          | Collier    | 2004      | 2009               | Dead                 | No                            | na               | Yes           | Yes      |      |  |
| UCFP117                  | J   | M    | No DNA               |          | Hendry     | 2006      | 2009               | Dead                 | No                            | 2                | No            | No       |      |  |
| UCFP118                  | J   | M    | Pco-1343             |          | Lee        | 2007      | 2009               | Dead                 | No                            | 2                | No            | No       |      |  |
| UCFP119                  | J   | F    | Pco-1344             |          | Collier    | 2007      | 2009               | Dead                 | No                            | na               | Yes           | No       |      |  |
| UCFP120                  | J   | F    | No DNA               |          | Hendry     | 2007      | 2009               | Dead                 | Unk                           | na               | No            | No       |      |  |
| UCFP121                  | J   | M    | Pco-1346             |          | Collier    | 2007      | 2009               | Dead                 | No                            | 2                | Yes           | No       |      |  |
| UCFP122                  | J   | M    | Pco-1347             |          | Collier    | 2007      | 2009               | Dead                 | Unk                           | 1                | No            | No       |      |  |
| UCFP123                  | H   | M    | Pco-1328             | CC328-08 | Georgia    | 2005      | 2008               | Dead                 | No                            | 2                | Unk           | Unk      |      |  |
| UCFP124                  | J   | M    | Pco-1361             |          | Collier    | 2008      | 2009               | Dead                 | Unk                           | TBD              | TBD           | TBD      |      |  |
| UCFP125                  | J   | F    | Pco-1363             |          | Collier    | 2007      | 2009               | Dead                 | Unk                           | TBD              | TBD           | TBD      |      |  |
| UCFP126                  | J   | M    | No DNA               |          | Collier    | 2007      | 2009               | Dead                 | Unk                           | TBD              | TBD           | TBD      |      |  |
| UCFP127                  | J   | F    | No DNA               |          | Collier    | 2006      | 2009               | Dead                 | Unk                           | TBD              | TBD           | TBD      |      |  |
| UCFP128                  | J   | N/A  | No DNA               |          | unknown    | TBD       | 2009               | Dead                 | Unk                           | TBD              | TBD           | TBD      |      |  |
| UCFP129                  | J   | M    | Pco-1364             |          | Collier    | 2009      | 2009               | Dead                 | Unk                           | TBD              | TBD           | TBD      |      |  |
| UCFP130                  | J   | F    | Pco-1365             |          | Collier    | 2006      | 2009               | Dead                 | Unk                           | TBD              | TBD           | TBD      |      |  |
| UCFP131                  | J   | F    | Pco-1366             |          | Hendry     | 2009      | 2009               | Dead                 | Unk                           | TBD              | TBD           | TBD      |      |  |
| UCFP132                  | J   | M    | No DNA               |          | Osceola    | 2006      | 2009               | Dead                 | Unk                           | TBD              | TBD           | TBD      |      |  |
| UCFP133                  | J   | M    | No DNA               |          | Collier    | 2006      | 2009               | Dead                 | Unk                           | TBD              | TBD           | TBD      |      |  |
| UCFP134                  | J   | M    | Pco-1368             |          | Co & Le    | 2006      | 2009               | Dead                 | Unk                           | TBD              | TBD           | TBD      |      |  |
| UCFP135                  | J   | F    | No DNA               |          | Collier    | 2005      | 2009               | Dead                 | Unk                           | TBD              | TBD           | TBD      |      |  |
| UCFP136                  | J   | F    | Pco-1382             |          | Collier    | 2009      | 2009               | Dead                 | Unk                           | TBD              | TBD           | TBD      |      |  |
| UCFP137                  | J   | M    | No DNA               |          | Lee        | 2007      | 2010               | Dead                 | Unk                           | TBD              | TBD           | TBD      |      |  |
| UCFP138                  | J   | M    | No DNA               |          | Collier    | 2001      | 2009               | Dead                 | Unk                           | TBD              | TBD           | TBD      |      |  |
| UCFP139                  | J   | F    | Pco-1369             |          | Co & Le    | 2007      | 2010               | Dead                 | Unk                           | TBD              | TBD           | TBD      |      |  |
| UCFP-LawEnfor            | H   | U    | Pco-1224             |          |            | Unk       | 2006               | Dead                 | Unk                           | Unk              | Unk           | Unk      |      |  |
| K002                     | C   | M    | Pco-0487             |          |            | 1992      |                    | Kitten Unk           | Unk                           | Unk              | Unk           | Unk      |      |  |
| K003                     | C   | M    | No DNA               |          |            | 1993      |                    | Kitten Unk           | Unk                           | Unk              | Unk           | Unk      |      |  |
| K004                     | C   | F    | No DNA               |          |            | 1993      |                    | Kitten Unk           | Unk                           | na               | Unk           | Unk      |      |  |
| K005                     | C   | F    | No DNA               |          |            | 1993      |                    | Kitten Unk           | Unk                           | na               | Unk           | Unk      |      |  |
| K006                     | C   | M    | Pco-0955             |          |            | 1993      |                    | Kitten Unk           | Unk                           | Unk              | Unk           | Unk      |      |  |
| K007                     | C   | F    | No DNA               |          |            | 1993      |                    | Kitten Unk           | Unk                           | na               | Unk           | Unk      |      |  |
| K008                     | C   | F    | No DNA               |          |            | 1993      |                    | Kitten Unk           | Unk                           | na               | Unk           | Unk      |      |  |
| K010                     | C   | F    | No DNA               |          |            | 1994      |                    | Kitten Unk           | Unk                           | na               | Unk           | Unk      |      |  |
| K011 or K009             | C   | M    | No DNA               |          |            | 1994      |                    | Kitten Unk           | Unk                           | Unk              | Unk           | Unk      |      |  |
| K013                     | C   | F    | Pco-0957             |          |            | 1994      |                    | Kitten Unk           | Unk                           | na               | Unk           | Unk      |      |  |
| K014                     | E   | F    | No DNA               |          |            | 1995      |                    | Kitten Unk           | Unk                           | na               | Unk           | Unk      |      |  |
| K015                     | E   | F    | No DNA               |          |            | 1995      |                    | Kitten Unk           | Unk                           | na               | Unk           | Unk      |      |  |
| K017                     | C   | F    | Pco-1220             |          |            | 1995      |                    | Kitten Unk           | Unk                           | na               | Unk           | Unk      |      |  |
| K020                     | C   | M    | No DNA               |          |            | 1995      |                    | Kitten Unk           | Unk                           | Unk              | Unk           | Unk      |      |  |
| K021                     | C   | M    | No DNA               |          |            | 1995      |                    | Kitten Unk           | Unk                           | Unk              | Unk           | Unk      |      |  |
| K022                     | C   | M    | No DNA               |          |            | 1995      |                    | Kitten Unk           | Unk                           | Unk              | Unk           | Unk      |      |  |

Table S2

**DEMOGRAPHIC INFORMATION**

**TRAITS**

**PEDIGREE**

| Field ID & Genetic group | SEX | PCO# | FLMNH & Necropsy IDs | County  | Birth Year | Loss Year | Status on 4/1/2010 | Atrial Septal Defect | Number of Descended Testicles | Thoracic Cowlick | Tail tip Kink | Pedigree |      |
|--------------------------|-----|------|----------------------|---------|------------|-----------|--------------------|----------------------|-------------------------------|------------------|---------------|----------|------|
|                          |     |      |                      |         |            |           |                    |                      |                               |                  |               | Dam      | Sire |
| K023F1                   | H   | F    | No DNA               |         | 1995       |           | Kitten Unk         | Unk                  | na                            | Unk              | Unk           |          |      |
| K024                     | C   | F    | No DNA               |         | 1996       |           | Kitten Unk         | Unk                  | na                            | Unk              | Unk           |          |      |
| K025                     | C   | M    | No DNA               |         | 1996       |           | Kitten Unk         | Unk                  | Unk                           | Unk              | Unk           |          |      |
| K026                     | C   | M    | No DNA               |         | 1996       |           | Kitten Unk         | Unk                  | Unk                           | Unk              | Unk           |          |      |
| K027                     | C   | F    | No DNA               |         | 1996       |           | Kitten Unk         | Unk                  | na                            | Unk              | Unk           |          |      |
| K028                     | C   | F    | No DNA               |         | 1996       |           | Kitten Unk         | Unk                  | na                            | Unk              | Unk           |          |      |
| K029                     | C   | Unk  | No DNA               |         | 1996       |           | Kitten Unk         | Unk                  | Unk                           | Unk              | Unk           |          |      |
| K030                     | C   | Unk  | No DNA               |         | 1996       |           | Kitten Unk         | Unk                  | Unk                           | Unk              | Unk           |          |      |
| K034F1                   | H   | F    | No DNA               |         | 1996       |           | Kitten Unk         | Unk                  | na                            | Unk              | Unk           |          |      |
| K037                     | C   | M    | Pco-0720             |         | 1997       |           | Kitten Unk         | Unk                  | Unk                           | Unk              | Unk           |          |      |
| K040                     | C   | M    | No DNA               |         | 1997       |           | Kitten Unk         | Unk                  | Unk                           | Unk              | Unk           |          |      |
| K041                     | C   | F    | No DNA               |         | 1997       |           | Kitten Unk         | Unk                  | na                            | Unk              | Unk           |          |      |
| K043                     | C   | M    | No DNA               |         | 1997       |           | Kitten Unk         | Unk                  | Unk                           | Unk              | Unk           |          |      |
| K044                     | J   | M    | No DNA               |         | 1997       |           | Kitten Unk         | Unk                  | Unk                           | Unk              | Unk           |          |      |
| K046F1                   | H   | M    | No DNA               |         | 1998       |           | Kitten Unk         | Unk                  | Unk                           | Unk              | Unk           |          |      |
| K047F1                   | H   | M    | No DNA               |         | 1998       |           | Kitten Unk         | Unk                  | Unk                           | Unk              | Unk           |          |      |
| K049                     | H   | F    | Pco-1219             | Collier | 1998       | 2005      | Dead               | No                   | na                            | No               | No            |          |      |
| K050                     | H   | M    | No DNA               |         | 1998       |           | Kitten Unk         | Unk                  | Unk                           | Unk              | Unk           |          |      |
| K051                     | C   | M    | No DNA               |         | 1998       |           | Kitten Unk         | Unk                  | Unk                           | Unk              | Unk           |          |      |
| K052                     | H   | M    | No DNA               | Collier | 1998       |           | Kitten Unk         | Unk                  | Unk                           | Unk              | Unk           |          |      |
| K053                     | H   | F    | No DNA               | Collier | 1998       |           | Kitten Unk         | Unk                  | na                            | Unk              | Unk           |          |      |
| K054                     | H   | M    | No DNA               | Collier | 1998       |           | Kitten Unk         | Unk                  | Unk                           | Unk              | Unk           |          |      |
| K055                     | J   | M    | No DNA               |         | 1999       |           | Kitten Unk         | Unk                  | Unk                           | Unk              | Unk           |          |      |
| K056                     | H   | F    | No DNA               |         | 1999       |           | Kitten Unk         | Unk                  | na                            | Unk              | Unk           |          |      |
| K057                     | H   | M    | No DNA               |         | 1999       |           | Kitten Unk         | Unk                  | Unk                           | Unk              | Unk           |          |      |
| K061                     | H   | M    | No DNA               |         | 1999       |           | Kitten Unk         | Unk                  | Unk                           | Unk              | Unk           |          |      |
| K062F1                   | H   | F    | Pco-0913             |         | 1999       | 2004      | Parent in '04      | Unk                  | na                            | Unk              | Unk           |          |      |
| K069                     | H   | M    | Pco-0920             |         | 1999       |           | Kitten Unk         | Unk                  | Unk                           | Unk              | Unk           |          |      |
| K070                     | H   | F    | Pco-0921             |         | 1999       |           | Kitten Unk         | Unk                  | na                            | Unk              | Unk           |          |      |
| K071                     | C   | M    | Pco-0929             |         | 1999       | 2005      | Parent in '05      | Unk                  | Unk                           | Unk              | Unk           |          |      |
| K072                     | C   | F    | Pco-0930             | Hendry  | 1999       |           | Kitten Unk         | Unk                  | na                            | Unk              | Unk           |          |      |
| K073                     | C   | F    | Pco-0931             | Hendry  | 1999       |           | Kitten Unk         | Unk                  | na                            | Unk              | Unk           |          |      |
| K074                     | C   | F    | Pco-0932             |         | 1999       |           | Kitten Unk         | Unk                  | na                            | Unk              | Unk           |          |      |
| K075                     | C   | F    | Pco-0933             |         | 1999       |           | Kitten Unk         | Unk                  | na                            | Unk              | Unk           |          |      |
| K076                     | H   | M    | Pco-0935             | Collier | 1999       | 2000      | Dead               | No                   | Unk                           | Unk              | No            |          |      |
| K077                     | H   | F    | Pco-0936             |         | 1999       |           | Kitten Unk         | Unk                  | na                            | Unk              | Unk           |          |      |
| K078                     | H   | F    | Pco-0937             |         | 1999       |           | Kitten Unk         | Unk                  | na                            | Unk              | Unk           |          |      |
| K081                     | H   | M    | Pco-0976             |         | 2000       |           | Kitten Unk         | Unk                  | Unk                           | Unk              | Unk           |          |      |
| K083                     | H   | M    | Pco-0978             |         | 2000       |           | Kitten Unk         | Unk                  | Unk                           | Unk              | Unk           |          |      |
| K084                     | C   | M    | Pco-0980             |         | 2000       |           | Kitten Unk         | Unk                  | Unk                           | Unk              | Unk           |          |      |
| K085                     | C   | F    | Pco-0981             |         | 2000       |           | Kitten Unk         | Unk                  | na                            | Unk              | Unk           |          |      |
| K087                     | H   | F    | Pco-0985             | Hendry  | 2000       |           | Kitten Unk         | Unk                  | na                            | Unk              | Unk           |          |      |
| K088                     | H   | M    | Pco-0986             | Hendry  | 2000       |           | Kitten Unk         | Unk                  | Unk                           | Unk              | Unk           |          |      |
| K091                     | H   | M    | Pco-0995             |         | 2001       |           | Kitten Unk         | Unk                  | Unk                           | Unk              | Unk           |          |      |
| K092                     | H   | F    | Pco-0998             |         | 2001       |           | Kitten Unk         | Unk                  | na                            | Unk              | Unk           |          |      |
| K094                     | H   | M    | Pco-1218             | UF31104 | 2001       | 2004      | Dead               | No                   | 2                             | No               | No            |          |      |
| K095                     | H   | F    | No DNA               | Collier | 2001       |           | Kitten Unk         | Unk                  | na                            | Unk              | Unk           |          |      |
| K096                     | H   | M    | No DNA               | Collier | 2001       |           | Kitten Unk         | Unk                  | Unk                           | Unk              | Unk           |          |      |
| K097                     | H   | F    | No DNA               | Collier | 2001       |           | Kitten Unk         | Unk                  | na                            | Unk              | Unk           |          |      |
| K099                     | H   | M    | Pco-1008             | Hendry  | 2001       |           | Kitten Unk         | Unk                  | Unk                           | Unk              | Unk           |          |      |
| K100                     | H   | M    | Pco-1009             | Hendry  | 2001       |           | Kitten Unk         | Unk                  | Unk                           | Unk              | Unk           |          |      |
| K101                     | H   | M    | Pco-1010             | Hendry  | 2001       |           | Kitten Unk         | Unk                  | Unk                           | Unk              | Unk           |          |      |
| K102                     | C   | M    | Pco-1011             |         | 2001       |           | Kitten Unk         | Unk                  | Unk                           | Unk              | Unk           |          |      |
| K103                     | C   | M    | Pco-1012             |         | 2001       |           | Kitten Unk         | Unk                  | Unk                           | Unk              | Unk           |          |      |
| K104                     | H   | M    | Pco-1013             |         | 2001       |           | Kitten Unk         | Unk                  | Unk                           | Unk              | Unk           |          |      |
| K105                     | H   | M    | Pco-1014             |         | 2001       |           | Kitten Unk         | Unk                  | Unk                           | Unk              | Unk           |          |      |
| K106                     | H   | M    | Pco-1015             |         | 2001       |           | Kitten Unk         | Unk                  | Unk                           | Unk              | Unk           |          |      |
| K107                     | H   | M    | Pco-1017             |         | 2001       |           | Kitten Unk         | Unk                  | Unk                           | Unk              | Unk           |          |      |

Table S2



**DEMOGRAPHIC INFORMATION**

**TRAITS**

**PEDIGREE**

| Field ID & Genetic group | SEX | PCO# | FLMNH & Necropsy IDs | County  | Birth Year | Loss Year | Status on 4/1/2010 | Atrial Septal Defect | Number of Descended Testicles | Thoracic Cowlick | Tail tip Kink | Pedigree |      |
|--------------------------|-----|------|----------------------|---------|------------|-----------|--------------------|----------------------|-------------------------------|------------------|---------------|----------|------|
|                          |     |      |                      |         |            |           |                    |                      |                               |                  |               | Dam      | Sire |
| K108                     | H   | M    | Pco-1018             |         | 2001       |           | Kitten Unk         | Unk                  | Unk                           | Unk              | Unk           |          |      |
| K109                     | H   | M    | Pco-1025             | Hendry  | 2002       |           | Kitten Unk         | Unk                  | Unk                           | Unk              | Unk           |          |      |
| K110                     | H   | M    | Pco-1026             | Hendry  | 2002       |           | Kitten Unk         | Unk                  | Unk                           | Unk              | Unk           |          |      |
| K111                     | H   | F    | Pco-1027             | Hendry  | 2002       |           | Kitten Unk         | Unk                  | na                            | Unk              | Unk           |          |      |
| K112                     | H   | F    | Pco-1030             |         | 2002       |           | Kitten Unk         | Unk                  | na                            | Unk              | Unk           |          |      |
| K114                     | H   | F    | Pco-1032             | Collier | 2002       |           | Kitten Unk         | Unk                  | na                            | Unk              | Unk           |          |      |
| K116                     | H   | F    | Pco-1034             | Collier | 2002       |           | Kitten Unk         | Unk                  | na                            | Unk              | Unk           |          |      |
| K117                     | C   | F    | Pco-1035             |         | 2002       |           | Kitten Unk         | Unk                  | na                            | Unk              | Unk           |          |      |
| K118                     | C   | F    | Pco-1036             |         | 2002       |           | Kitten Unk         | Unk                  | na                            | Unk              | Unk           |          |      |
| K121                     | H   | M    | Pco-1039             |         | 2002       |           | Kitten Unk         | Unk                  | Unk                           | Unk              | Unk           |          |      |
| K122                     | H   | F    | Pco-1040             |         | 2002       |           | Kitten Unk         | Unk                  | na                            | Unk              | Unk           |          |      |
| K123                     | H   | M    | Pco-1041             |         | 2002       | 2004      | Parent in '04      | Unk                  | Unk                           | Unk              | Unk           |          |      |
| K124                     | C   | F    | Pco-1042             |         | 2002       |           | Kitten Unk         | Unk                  | na                            | Unk              | Unk           |          |      |
| K125                     | C   | M    | Pco-1043             |         | 2002       |           | Kitten Unk         | Unk                  | Unk                           | Unk              | Unk           |          |      |
| K126                     | C   | M    | Pco-1044             |         | 2002       |           | Kitten Unk         | Unk                  | Unk                           | Unk              | Unk           |          |      |
| K127                     | H   | F    | Pco-1046             |         | 2002       |           | Kitten Unk         | Unk                  | na                            | Unk              | Unk           |          |      |
| K128                     | C   | M    | Pco-1047             | Hendry  | 2002       | 2004      | Dead               | No                   | 2                             | Yes              | Yes           |          |      |
| K130                     | C   | M    | Pco-1049             |         | 2002       |           | Kitten Unk         | Unk                  | Unk                           | Unk              | Unk           |          |      |
| K131                     | C   | M    | Pco-1050             |         | 2002       |           | Kitten Unk         | Unk                  | Unk                           | Unk              | Unk           |          |      |
| K133                     | C   | M    | Pco-1052             |         | 2002       |           | Kitten Unk         | Unk                  | Unk                           | Unk              | Unk           |          |      |
| K134                     | C   | M    | Pco-1053             |         | 2002       |           | Kitten Unk         | Unk                  | Unk                           | Unk              | Unk           |          |      |
| K135                     | H   | M    | Pco-1054             |         | 2002       |           | Kitten Unk         | Unk                  | Unk                           | Unk              | Unk           |          |      |
| K136                     | H   | F    | Pco-1055             |         | 2002       |           | Kitten Unk         | Unk                  | na                            | Unk              | Unk           |          |      |
| K137                     | H   | F    | Pco-1056             |         | 2002       |           | Kitten Unk         | Unk                  | na                            | Unk              | Unk           |          |      |
| K138                     | H   | M    | Pco-1057             |         | 2002       |           | Kitten Unk         | Unk                  | Unk                           | Unk              | Unk           |          |      |
| K139                     | H   | F    | Pco-1221             | Dade    | 2002       |           | Kitten Unk         | Unk                  | na                            | Unk              | Unk           |          |      |
| K140                     | H   | M    | Pco-1222             | Dade    | 2002       |           | Kitten Unk         | Unk                  | Unk                           | Unk              | Unk           |          |      |
| K141                     | H   | M    | No DNA               | Dade    | 2002       |           | Kitten Unk         | Unk                  | Unk                           | Unk              | Unk           |          |      |
| K142                     | H   | F    | Pco-1223             | Dade    | 2002       |           | Kitten Unk         | Unk                  | na                            | Unk              | Unk           |          |      |
| K143                     | H   | F    | Pco-1062             |         | 2003       |           | Kitten Unk         | Unk                  | na                            | Unk              | Unk           |          |      |
| K144                     | H   | M    | Pco-1063             |         | 2003       |           | Kitten Unk         | Unk                  | Unk                           | Unk              | Unk           |          |      |
| K145                     | H   | F    | No DNA               |         | 2003       |           | Kitten Unk         | Unk                  | na                            | Unk              | Unk           |          |      |
| K146                     | H   | F    | Pco-1066             |         | 2003       |           | Kitten Unk         | Unk                  | na                            | Unk              | Unk           |          |      |
| K148                     | H   | F    | Pco-1068             |         | 2003       |           | Kitten Unk         | Unk                  | na                            | Unk              | Unk           |          |      |
| K149                     | H   | F    | Pco-1072             | Hendry  | 2003       |           | Kitten Unk         | Unk                  | na                            | Unk              | Unk           |          |      |
| K151                     | H   | F    | Pco-1073             | Hendry  | 2003       |           | Kitten Unk         | Unk                  | na                            | Unk              | Unk           |          |      |
| K153                     | H   | M    | Pco-1080             | Collier | 2003       | 2005      | Dead               | No                   | 2                             | No               | Yes           |          |      |
| K154                     | H   | M    | Pco-1081             |         | 2003       |           | Kitten Unk         | Unk                  | Unk                           | Unk              | Unk           |          |      |
| K155                     | H   | F    | Pco-1089             |         | 2004       |           | Kitten Unk         | Unk                  | na                            | Unk              | Unk           |          |      |
| K156                     | H   | M    | Pco-1090             | Collier | 2004       | 2004      | Dead               | No                   | 2                             | No               | No            |          |      |
| K157                     | H   | M    | Pco-1099             |         | 2004       |           | Kitten Unk         | Unk                  | Unk                           | Unk              | Unk           |          |      |
| K158                     | H   | M    | Pco-1100             |         | 2004       |           | Kitten Unk         | Unk                  | Unk                           | Unk              | Unk           |          |      |
| K159                     | H   | F    | Pco-1101             |         | 2004       |           | Kitten Unk         | Unk                  | na                            | Unk              | Unk           |          |      |
| K160                     | H   | F    | Pco-1104             |         | 2004       |           | Kitten Unk         | Unk                  | na                            | Unk              | Unk           |          |      |
| K161                     | H   | F    | Pco-1105             |         | 2004       |           | Kitten Unk         | Unk                  | na                            | Unk              | Unk           |          |      |
| K162                     | H   | M    | Pco-1106             |         | 2004       |           | Kitten Unk         | Unk                  | Unk                           | Unk              | Unk           |          |      |
| K163                     | H   | M    | Pco-1109             |         | 2004       |           | Kitten Unk         | Unk                  | Unk                           | Unk              | Unk           |          |      |
| K164                     | H   | M    | Pco-1110             |         | 2004       |           | Kitten Unk         | Unk                  | Unk                           | Unk              | Unk           |          |      |
| K165                     | H   | F    | Pco-1111             |         | 2004       |           | Kitten Unk         | Unk                  | na                            | Unk              | Unk           |          |      |
| K166                     | H   | F    | Pco-1112             |         | 2004       |           | Kitten Unk         | Unk                  | na                            | Unk              | Unk           |          |      |
| K167                     | H   | F    | Pco-1113             |         | 2004       |           | Kitten Unk         | Unk                  | na                            | Unk              | Unk           |          |      |
| K168                     | H   | M    | Pco-1114             |         | 2004       |           | Kitten Unk         | Unk                  | Unk                           | Unk              | Unk           |          |      |
| K170                     | H   | F    | Pco-1117             |         | 2004       |           | Kitten Unk         | Unk                  | na                            | Unk              | Unk           |          |      |
| K171                     | H   | M    | Pco-1118             |         | 2004       |           | Kitten Unk         | Unk                  | Unk                           | Unk              | Unk           |          |      |
| K172                     | H   | F    | Pco-1119             |         | 2004       |           | Kitten Unk         | Unk                  | na                            | Unk              | Unk           |          |      |
| K173                     | H   | F    | Pco-1120             |         | 2004       |           | Kitten Unk         | Unk                  | na                            | Unk              | Unk           |          |      |
| K174                     | H   | M    | Pco-1121             | Collier | 2004       |           | Kitten Unk         | Unk                  | Unk                           | Unk              | Unk           |          |      |
| K175                     | H   | M    | Pco-1141             |         | 2005       |           | Kitten Unk         | Unk                  | Unk                           | Unk              | Unk           |          |      |

Table S2

**DEMOGRAPHIC INFORMATION**

**TRAITS**

**PEDIGREE**

| Field ID & Genetic group | SEX | PCO# | FLMNH & Necropsy IDs | County | Birth Year | Loss Year | Status on 4/1/2010 | Atrial Septal Defect | Number of Descended Testicles | Thoracic Cowlick | Tail tip Kink | Pedigree |      |
|--------------------------|-----|------|----------------------|--------|------------|-----------|--------------------|----------------------|-------------------------------|------------------|---------------|----------|------|
|                          |     |      |                      |        |            |           |                    |                      |                               |                  |               | Dam      | Sire |
| K176                     | H   | M    | Pco-1142             |        | 2005       |           | Kitten Unk         | Unk                  | Unk                           | Unk              | Unk           |          |      |
| K177                     | H   | F    | Pco-1143             |        | 2005       |           | Kitten Unk         | Unk                  | na                            | Unk              | Unk           |          |      |
| K178                     | H   | M    | Pco-1191             |        | 2005       |           | Kitten Unk         | Unk                  | Unk                           | Unk              | Unk           |          |      |
| K179                     | H   | F    | Pco-1192             |        | 2005       |           | Kitten Unk         | Unk                  | na                            | Unk              | Unk           |          |      |
| K180                     | H   | F    | Pco-1145             |        | 2005       |           | Kitten Unk         | Unk                  | na                            | Unk              | Unk           |          |      |
| K181                     | H   | F    | Pco-1146             |        | 2005       |           | Kitten Unk         | Unk                  | na                            | Unk              | Unk           |          |      |
| K182                     | H   | F    | Pco-1148             |        | 2005       |           | Kitten Unk         | Unk                  | na                            | Unk              | Unk           |          |      |
| K183                     | H   | M    | Pco-1149             |        | 2005       |           | Kitten Unk         | Unk                  | Unk                           | Unk              | Unk           |          |      |
| K185                     | U   | M    | No DNA               |        | 2005       |           | Kitten Unk         | Unk                  | Unk                           | Unk              | Unk           |          |      |
| K186                     | U   | F    | No DNA               |        | 2005       |           | Kitten Unk         | Unk                  | na                            | Unk              | Unk           |          |      |
| K187                     | C   | M    | Pco-1153             |        | 2005       |           | Kitten Unk         | Unk                  | Unk                           | Unk              | Unk           |          |      |
| K188                     | C   | F    | Pco-1154             |        | 2005       |           | Kitten Unk         | Unk                  | na                            | Unk              | Unk           |          |      |
| K189                     | C   | M    | Pco-1155             |        | 2005       |           | Kitten Unk         | Unk                  | Unk                           | Unk              | Unk           |          |      |
| K190                     | H   | M    | Pco-1156             |        | 2005       |           | Kitten Unk         | Unk                  | Unk                           | Unk              | Unk           |          |      |
| K191                     | H   | M    | Pco-1157             |        | 2005       |           | Kitten Unk         | Unk                  | Unk                           | Unk              | Unk           |          |      |
| K192                     | H   | M    | Pco-1158             |        | 2005       |           | Kitten Unk         | Unk                  | Unk                           | Unk              | Unk           |          |      |
| K193                     | H   | F    | No DNA               |        | 2005       |           | Kitten Unk         | Unk                  | na                            | Unk              | Unk           |          |      |
| K194                     | H   | F    | Pco-1160             |        | 2005       |           | Kitten Unk         | Unk                  | na                            | Unk              | Unk           |          |      |
| K195                     | H   | M    | No DNA               |        | 2005       |           | Kitten Unk         | Unk                  | Unk                           | Unk              | Unk           |          |      |
| K196                     | H   | M    | Pco-1162             |        | 2005       |           | Kitten Unk         | Unk                  | Unk                           | Unk              | Unk           |          |      |
| K197                     | H   | M    | Pco-1163             |        | 2005       |           | Kitten Unk         | Unk                  | Unk                           | Unk              | Unk           |          |      |
| K198                     | H   | M    | Pco-1164             |        | 2005       |           | Kitten Unk         | Unk                  | Unk                           | Unk              | Unk           |          |      |
| K199                     | H   | F    | Pco-1165             |        | 2005       | 2007      | Dead               | Unk                  | na                            | Yes              | Unk           |          |      |
| K200                     | H   | F    | Pco-1172             |        | 2006       |           | Kitten Unk         | Unk                  | na                            | Unk              | Unk           |          |      |
| K201                     | H   | M    | Pco-1173             |        | 2006       |           | Kitten Unk         | Unk                  | Unk                           | Unk              | Unk           |          |      |
| K202                     | H   | F    | Pco-1176             |        | 2006       |           | Kitten Unk         | Unk                  | na                            | Unk              | Unk           |          |      |
| K203                     | H   | M    | No DNA               |        | 2006       | 2006      | Dead               | Unk                  | Unk                           | Unk              | Unk           |          |      |
| K204                     | H   | M    | Pco-1178             |        | 2006       |           | Kitten Unk         | Unk                  | Unk                           | Unk              | Unk           |          |      |
| K205                     | H   | F    | Pco-1179             |        | 2006       |           | Kitten Unk         | Unk                  | na                            | Unk              | Unk           |          |      |
| K206                     | H   | M    | Pco-1180             |        | 2006       |           | Kitten Unk         | Unk                  | Unk                           | Unk              | Unk           |          |      |
| K207                     | H   | F    | Pco-1181             |        | 2006       |           | Kitten Unk         | Unk                  | na                            | Unk              | Unk           |          |      |
| K208                     | H   | F    | Pco-1182             |        | 2006       |           | Kitten Unk         | Unk                  | na                            | Unk              | Unk           |          |      |
| K209                     | H   | F    | Pco-1183             |        | 2006       |           | Kitten Unk         | Unk                  | na                            | Unk              | Unk           |          |      |
| K210                     | H   | F    | Pco-1184             |        | 2006       |           | Kitten Unk         | Unk                  | na                            | Unk              | Unk           |          |      |
| K211                     | H   | F    | No DNA               |        | 2006       |           | Kitten Unk         | Unk                  | na                            | Unk              | Unk           |          |      |
| K212                     | H   | F    | Pco-1186             |        | 2006       |           | Kitten Unk         | Unk                  | na                            | Unk              | Unk           |          |      |
| K213                     | H   | F    | Pco-1187             |        | 2006       |           | Kitten Unk         | Unk                  | na                            | Unk              | Unk           |          |      |
| K214                     | H   | F    | Pco-1188             |        | 2006       |           | Kitten Unk         | Unk                  | na                            | Unk              | Unk           |          |      |
| K215                     | H   | F    | No DNA               |        | 2006       |           | Kitten Unk         | Unk                  | na                            | Unk              | Unk           |          |      |
| K216                     | H   | M    | Pco-1190             |        | 2006       |           | Kitten Unk         | Unk                  | Unk                           | Unk              | Unk           |          |      |
| K217                     | H   | M    | Pco-1211             |        | 2006       |           | Kitten Unk         | Unk                  | Unk                           | Unk              | Unk           |          |      |
| K218                     | H   | M    | Pco-1212             |        | 2006       |           | Kitten Unk         | Unk                  | Unk                           | Unk              | Unk           |          |      |
| K219                     | H   | F    | Pco-1229             |        | 2006       |           | Kitten Unk         | Unk                  | na                            | Unk              | Unk           |          |      |
| K220                     | H   | M    | Pco-1230             |        | 2006       |           | Kitten Unk         | Unk                  | Unk                           | Unk              | Unk           |          |      |
| K221                     | H   | F    | Pco-1234             |        | 2006       |           | Kitten Unk         | Unk                  | na                            | Unk              | Unk           |          |      |
| K222                     | H   | M    | Pco-1235             |        | 2006       |           | Kitten Unk         | Unk                  | Unk                           | Unk              | Unk           |          |      |
| K223                     | H   | F    | Pco-1236             |        | 2006       |           | Kitten Unk         | Unk                  | na                            | Unk              | Unk           |          |      |
| K224                     | H   | M    | No DNA               |        | 2007       |           | Kitten Unk         | Unk                  | Unk                           | Unk              | Unk           |          |      |
| K225                     | H   | M    | No DNA               |        | 2007       |           | Kitten Unk         | Unk                  | Unk                           | Unk              | Unk           |          |      |
| K226                     | H   | M    | Pco-1241             |        | 2007       |           | Kitten Unk         | Unk                  | Unk                           | Unk              | Unk           |          |      |
| K228                     | H   | F    | Pco-1243             |        | 2007       |           | Kitten Unk         | Unk                  | na                            | Unk              | Unk           |          |      |
| K229                     | H   | F    | Pco-1244             |        | 2007       |           | Kitten Unk         | Unk                  | na                            | Unk              | Unk           |          |      |
| K230                     | H   | M    | Pco-1245             |        | 2007       |           | Kitten Unk         | Unk                  | Unk                           | Unk              | Unk           |          |      |
| K231                     | H   | F    | No DNA               |        | 2007       |           | Kitten Unk         | Unk                  | na                            | Unk              | Unk           |          |      |
| K232                     | H   | M    | No DNA               |        | 2007       |           | Kitten Unk         | Unk                  | Unk                           | Unk              | Unk           |          |      |
| K233                     | H   | F    | Pco-1246             |        | 2007       |           | Kitten Unk         | Unk                  | na                            | Unk              | Unk           |          |      |
| K234                     | H   | M    | Pco-1247             |        | 2007       |           | Kitten Unk         | Unk                  | Unk                           | Unk              | Unk           |          |      |
| K236                     | H   | F    | Pco-1252             |        | 2007       |           | Kitten Unk         | Unk                  | na                            | Unk              | Unk           |          |      |

Table S2

**DEMOGRAPHIC INFORMATION**

**TRAITS**

**PEDIGREE**

| Field ID & Genetic group | SEX | PCO# | FLMNH & Necropsy IDs | County  | Birth Year | Loss Year | Status on 4/1/2010 | Atrial Septal Defect | Number of Descended Testicles | Thoracic Cowlick | Tail tip Kink | Pedigree |      |
|--------------------------|-----|------|----------------------|---------|------------|-----------|--------------------|----------------------|-------------------------------|------------------|---------------|----------|------|
|                          |     |      |                      |         |            |           |                    |                      |                               |                  |               | Dam      | Sire |
| K237                     | H   | F    | Pco-1253             |         | 2007       |           | Kitten Unk         | Unk                  | na                            | Unk              | Unk           |          |      |
| K238                     | H   | M    | Pco-1254             |         | 2007       |           | Kitten Unk         | Unk                  | Unk                           | Unk              | Unk           |          |      |
| K239                     | H   | F    | Pco-1258             |         | 2007       |           | Kitten Unk         | Unk                  | na                            | Unk              | Unk           |          |      |
| K240                     | H   | F    | Pco-1259             | Collier | 2007       |           | Kitten Unk         | Unk                  | na                            | Unk              | Unk           |          |      |
| K241                     | H   | M    | Pco-1255             |         | 2007       |           | Kitten Unk         | Unk                  | Unk                           | Unk              | Unk           |          |      |
| K242                     | H   | F    | Pco-1256             |         | 2007       |           | Kitten Unk         | Unk                  | na                            | Unk              | Unk           |          |      |
| K243                     | H   | F    | Pco-1257             |         | 2007       |           | Kitten Unk         | Unk                  | na                            | Unk              | Unk           |          |      |
| K244                     | H   | M    | Pco-1260             |         | 2007       |           | Kitten Unk         | Unk                  | Unk                           | Unk              | Unk           |          |      |
| K245                     | H   | M    | Pco-1261             |         | 2007       |           | Kitten Unk         | Unk                  | Unk                           | Unk              | Unk           |          |      |
| K246                     | H   | F    | Pco-1262             |         | 2007       |           | Kitten Unk         | Unk                  | na                            | Unk              | Unk           |          |      |
| K247                     | H   | F    | Pco-1263             | Collier | 2007       | 2007      | Dead               | No                   | na                            | Unk              | Yes           |          |      |
| K248                     | H   | M    | Pco-1264             | Collier | 2007       | 2007      | Dead               | Unk                  | Unk                           | Unk              | Unk           |          |      |
| K249                     | H   | F    | Pco-1265             | Collier | 2007       | 2007      | Dead               | Unk                  | na                            | Unk              | Unk           |          |      |
| K250                     | H   | M    | Pco-1266             |         | 2007       |           | Kitten Unk         | Unk                  | Unk                           | Unk              | Unk           |          |      |
| K251                     | H   | M    | Pco-1267             |         | 2007       |           | Kitten Unk         | Unk                  | Unk                           | Unk              | Unk           |          |      |
| K252                     | H   | F    | Pco-1268             |         | 2007       |           | Kitten Unk         | Unk                  | na                            | Unk              | Unk           |          |      |
| K253                     | H   | M    | Pco-1280             | Collier | 2007       | 2009      | Dead               | No                   | 2                             | No               | Yes           |          |      |
| K255                     | H   | F    | Pco-1283             |         | 2007       |           | Kitten Unk         | Unk                  | na                            | Unk              | Unk           |          |      |
| K256                     | H   | F    | Pco-1282             |         | 2007       |           | Kitten Unk         | Unk                  | na                            | Unk              | Unk           |          |      |
| K257                     | H   | M    | Pco-1284             | Hendry  | 2007       |           | Kitten Unk         | Unk                  | Unk                           | Unk              | Unk           |          |      |
| K258                     | H   | M    | Pco-1285             | Hendry  | 2007       |           | Kitten Unk         | Unk                  | Unk                           | Unk              | Unk           |          |      |
| K259                     | H   | M    | Pco-1286             | Collier | 2007       | 2007      | Dead               | Unk                  | Unk                           | Unk              | Unk           |          |      |
| K260                     | H   | U    | Pco-1287             | Collier | 2007       | 2007      | Dead               | Unk                  | na                            | Unk              | Unk           |          |      |
| K261                     | H   | M    | Pco-1289             |         | 2007       |           | Kitten Unk         | Unk                  | Unk                           | Unk              | Unk           |          |      |
| K262                     | H   | M    | Pco-1290             |         | 2007       |           | Alive              | Unk                  | Unk                           | Unk              | Unk           |          |      |
| K263                     | H   | M    | Pco-1291             |         | 2007       |           | Kitten Unk         | Unk                  | Unk                           | Unk              | Unk           |          |      |
| K265                     | H   | M    | Pco-1301             |         | 2008       |           | Kitten Unk         | Unk                  | Unk                           | Unk              | Unk           |          |      |
| K266                     | H   | M    | Pco-1304             |         | 2008       |           | Kitten Unk         | Unk                  | Unk                           | Unk              | Unk           |          |      |
| K267                     | H   | M    | Pco-1305             |         | 2008       |           | Kitten Unk         | Unk                  | Unk                           | Unk              | Unk           |          |      |
| K268                     | H   | F    | Pco-1316             | Collier | 2008       | 2008      | Dead               | No                   | na                            | Unk              | Unk           |          |      |
| K269                     | H   | M    | Pco-1315             | Collier | 2008       | 2008      | Dead               | Unk                  | Unk                           | Unk              | Unk           |          |      |
| K270                     | H   | F    | Pco-1317             |         | 2008       |           | Kitten Unk         | Unk                  | Unk                           | Unk              | Unk           |          |      |
| K271                     | H   | M    | Pco-1318             |         | 2008       |           | Kitten Unk         | Unk                  | Unk                           | Unk              | Unk           |          |      |
| K272                     | H   | M    | Pco-1319             |         | 2008       |           | Kitten Unk         | Unk                  | Unk                           | Unk              | Unk           |          |      |
| K273                     | H   | M    | Pco-1320             |         | 2008       |           | Kitten Unk         | Unk                  | Unk                           | Unk              | Unk           |          |      |
| K274                     | H   | F    | Pco-1321             |         | 2008       |           | Kitten Unk         | Unk                  | Unk                           | Unk              | Unk           |          |      |
| K275                     | H   | M    | Pco-1322             |         | 2008       |           | Kitten Unk         | Unk                  | Unk                           | Unk              | Unk           |          |      |
| K276                     | H   | M    | Pco-1323             |         | 2008       |           | Kitten Unk         | Unk                  | Unk                           | Unk              | Unk           |          |      |
| K277                     | H   | M    | Pco-1338             |         | 2009       |           | Kitten Unk         | Unk                  | Unk                           | Unk              | Unk           |          |      |
| K278                     | H   | M    | Pco-1339             |         | 2009       |           | Kitten Unk         | Unk                  | Unk                           | Unk              | Unk           |          |      |
| K280                     | U   | F    | Pco-1345             |         | 2009       |           | Kitten Unk         | Unk                  | Unk                           | Unk              | Unk           |          |      |
| K281                     | H   | M    | Pco-1354             |         | 2009       |           | Kitten Unk         | Unk                  | Unk                           | Unk              | Unk           |          |      |
| K282                     | H   | M    | Pco-1355             |         | 2009       |           | Kitten Unk         | Unk                  | Unk                           | Unk              | Unk           |          |      |
| K283                     | U   | M    | Pco-1356             |         | 2009       |           | Kitten Unk         | Unk                  | Unk                           | Unk              | Unk           |          |      |
| K284                     | U   | M    | Pco-1357             |         | 2009       |           | Kitten Unk         | Unk                  | Unk                           | Unk              | Unk           |          |      |
| K285                     | U   | M    | Pco-1358             | Collier | 2009       |           | Kitten Unk         | Unk                  | Unk                           | Unk              | Unk           |          |      |
| K286                     | U   | M    | Pco-1359             | Collier | 2009       |           | Kitten Unk         | Unk                  | Unk                           | Unk              | Unk           |          |      |
| K287                     | U   | F    | Pco-1360             | Collier | 2009       |           | Kitten Unk         | Unk                  | na                            | Unk              | Unk           |          |      |
| K288                     | U   | M    | Pco-1376             |         | 2010       |           | Kitten Unk         | Unk                  | Unk                           | Unk              | Unk           |          |      |
| K289                     | U   | M    | Pco-1377             |         | 2010       |           | Kitten Unk         | Unk                  | Unk                           | Unk              | Unk           |          |      |
| K290                     | U   | M    | Pco-1378             |         | 2010       |           | Kitten Unk         | Unk                  | Unk                           | Unk              | Unk           |          |      |
| K291                     | H   | F    | Pco-1379             | Collier | 2010       |           | Kitten Unk         | Unk                  | na                            | Unk              | Unk           |          |      |
| K292                     | H   | M    | Pco-1380             | Collier | 2010       |           | Kitten Unk         | Unk                  | Unk                           | Unk              | Unk           |          |      |
| K293                     | H   | F    | Pco-1381             | Collier | 2010       |           | Kitten Unk         | Unk                  | na                            | Unk              | Unk           |          |      |
| K294                     | H   | U    | Pco-1383             |         | 2010       |           | Kitten Unk         | Unk                  | Unk                           | Unk              | Unk           |          |      |
| K295                     | H   | U    | Pco-1384             |         | 2010       |           | Kitten Unk         | Unk                  | Unk                           | Unk              | Unk           |          |      |
| K296                     | H   | U    | Pco-1385             |         | 2010       |           | Kitten Unk         | Unk                  | Unk                           | Unk              | Unk           |          |      |
| K297                     | H   | F    | Pco-1386             | Collier | 2010       |           | Kitten Unk         | Unk                  | na                            | Unk              | Unk           |          |      |

Table S2

**DEMOGRAPHIC INFORMATION**

**TRAITS**

**PEDIGREE**

| Field ID & Genetic group  | SEX | PCO# | FLMNH & Necropsy IDs | County  | Birth Year | Loss Year | Status on 4/1/2010 | Atrial Septal Defect | Number of Descended Testicles | Thoracic Cowlick | Tail tip Kink | Pedigree |      |
|---------------------------|-----|------|----------------------|---------|------------|-----------|--------------------|----------------------|-------------------------------|------------------|---------------|----------|------|
|                           |     |      |                      |         |            |           |                    |                      |                               |                  |               | Dam      | Sire |
| K298                      | H   | F    | Pco-1387             |         | 2010       |           | Kitten Unk         | Unk                  | na                            | Unk              | Unk           |          |      |
| K299                      | H   | M    | Pco-1388             | Hendry  | 2010       |           | Kitten Unk         | Unk                  | Unk                           |                  |               |          |      |
| unmar Ked2                | H   | U    | No DNA               |         | 2002       |           | Kitten Unk         | Unk                  | Unk                           | Unk              | Unk           |          |      |
| FP080 fetus #1            | C   | U    | Pco-0964             | Hendry  | 2000       | 2000      | Dead               | Unk                  | Unk                           | Unk              | Unk           |          |      |
| FP080 fetus #2            | C   | U    | Pco-0965             | Hendry  | 2000       | 2000      | Dead               | Unk                  | Unk                           | Unk              | Unk           |          |      |
| FP080 fetus #3            | C   | U    | Pco-0966             | Hendry  | 2000       | 2000      | Dead               | Unk                  | Unk                           | Unk              | Unk           |          |      |
| FP116 fetus #1            | J   | U    | Pco-1308             | Hendry  | 2007       | 2007      | Dead               | Unk                  | Unk                           | Unk              | Unk           |          |      |
| FP116 fetus #2            | J   | U    | Pco-1309             | Hendry  | 2007       | 2007      | Dead               | Unk                  | Unk                           | Unk              | Unk           |          |      |
| <b>TEXAS FEMALE PUMAS</b> |     |      |                      |         |            |           |                    |                      |                               |                  |               |          |      |
| TX101-BCNP BI             | T   | F    | Pco-0730             | Hendry  | 1991       | 2000      | Dead               | No                   | na                            | No               | No            |          |      |
| Tx103 fetus #1            | H   | U    | Pco-0954             |         | 1999       | 1999      | Dead               | Unk                  | Unk                           | Unk              | Unk           |          |      |
| TX102-BCNP BI             | T   | F    | Pco-0731             | Hendry  | 1991       | 1995      | Dead               | No                   | na                            | No               | No            |          |      |
| TX103-LP                  | T   | F    | Pco-0737             | Monroe  | 1991       | 1999      | Dead               | Unk                  | na                            | No               | No            |          |      |
| TX104-FSSP                | T   | F    | Pco-0732             | Collier | 1991       | 1998      | Dead               | No                   | na                            | No               | No            |          |      |
| TX105-ENP                 | T   | F    | Pco-0739             | Dade    | 1991       | 2003      | Captivity          | Unk                  | na                            | No               | No            |          |      |
| TX106-FSSP                | T   | F    | Pco-0733             | Collier | 1991       | 2003      | Captivity          | Unk                  | na                            | No               | No            |          |      |
| TX107-RP                  | T   | F    | Pco-0736             | Collier | 1991       | 2001      | Dead               | No                   | na                            | No               | No            |          |      |
| TX108-ENP                 | T   | F    | Pco-0740             | Dade    | 1991       | 2002      | Captivity          | Unk                  | na                            | No               | No            |          |      |

**DEMOGRAPHIC INFORMATION**

**TRAITS**

**PEDIGREE**

| Field ID & Genetic group                          | SEX | PCO# | FLMNH & Necropsy IDs | County | Birth Year | Loss Year | Status on 4/1/2010 | Atrial Septal Defect | Number of Descended Testicles | Thoracic Cowlick | Tail tip Kink | Pedigree |      |
|---------------------------------------------------|-----|------|----------------------|--------|------------|-----------|--------------------|----------------------|-------------------------------|------------------|---------------|----------|------|
|                                                   |     |      |                      |        |            |           |                    |                      |                               |                  |               | Dam      | Sire |
| <b>SEMINOLE INDIAN RESERVATION PUMAS</b>          |     |      |                      |        |            |           |                    |                      |                               |                  |               |          |      |
| WC00 "Little Boy"                                 | W   | M    | Pco-0742             |        |            |           |                    |                      |                               |                  |               |          |      |
| WC01 "castrated 10m"                              | W   | M    | Pco-0922             |        |            |           |                    |                      |                               |                  |               |          |      |
| WC02 "Opal daughter"                              | W   | F    | Pco-0959             |        |            |           |                    |                      |                               |                  |               |          |      |
| WC03                                              | W   | F    | Pco-0923             |        |            |           |                    |                      |                               |                  |               |          |      |
| WC04 "neutered"                                   | W   | F    | Pco-0924             |        |            |           |                    |                      |                               |                  |               |          |      |
| WC05 "Taz"                                        | W   | M    | Pco-0925             |        |            |           |                    |                      |                               |                  |               |          |      |
| WC06 "castrated 10"                               | W   | M    | Pco-0926             |        |            |           |                    |                      |                               |                  |               |          |      |
| WC07 "Opal"                                       | W   | F    | Pco-0927             |        |            |           |                    |                      |                               |                  |               |          |      |
| WC08 "Bubba"                                      | W   | M    | Pco-0928             |        |            |           |                    |                      |                               |                  |               |          |      |
| <b>PIPER - EVERGLADES WONDER GARDENS PANTHERS</b> |     |      |                      |        |            |           |                    |                      |                               |                  |               |          |      |
| Piper "Cmp Kalaqua"                               | M   |      | Pco-0011             |        |            |           |                    |                      |                               |                  |               |          |      |
| Piper "Offspring"                                 | F   |      | Pco-0034             |        |            |           |                    |                      |                               |                  |               |          |      |
| Piper "Ocho"                                      | M   |      | Pco-0039             |        |            |           |                    |                      |                               |                  |               |          |      |
| Piper "Bert Wahl"                                 | M   |      | Pco-0040             |        |            |           |                    |                      |                               |                  |               |          |      |
| Piper "Dies Dose"                                 | F   |      | Pco-0053             |        |            |           |                    |                      |                               |                  |               |          |      |
| Piper "Kima"                                      | M   |      | Pco-0054             |        |            |           |                    |                      |                               |                  |               |          |      |
| Piper "Survivor"                                  | U   |      | Pco-0055             |        |            |           |                    |                      |                               |                  |               |          |      |
| Piper "Florida"                                   | F   |      | Pco-0078             |        |            |           |                    |                      |                               |                  |               |          |      |
| Piper "Osceola"                                   | M   |      | Pco-0084             |        |            |           |                    |                      |                               |                  |               |          |      |
| Piper "Hayeta"                                    | F   |      | Pco-0085             |        |            |           |                    |                      |                               |                  |               |          |      |
| Piper "Synda"                                     | F   |      | Pco-0169             |        |            |           |                    |                      |                               |                  |               |          |      |
| Piper "Delilah / Fatim"                           | F   |      | Pco-0178             |        |            |           |                    |                      |                               |                  |               |          |      |
| Piper "Baca"                                      | M   |      | Pco-0179             |        |            |           |                    |                      |                               |                  |               |          |      |
| Piper "Numa"                                      | M   |      | Pco-0443             |        |            |           |                    |                      |                               |                  |               |          |      |

### DAM IDENTIFICATION

### SIRE IDENTIFICATION

| Field ID & Genetic group | Field Dam | Genetic Dam | Dam Consensus | Dam-offspring LOD score | Dam support | Field Sire | Genetic Sire | Sire Consensus | Sire Offspring LOD score | Sire support | Dame Sire and offspring LOD score |
|--------------------------|-----------|-------------|---------------|-------------------------|-------------|------------|--------------|----------------|--------------------------|--------------|-----------------------------------|
| <b>FLORIDA</b>           |           |             |               |                         |             |            |              |                |                          |              |                                   |
| FP001                    | Unk       | Unk-PNI     | UnK-PNI       |                         | G           | Unk        | Unk-PNI      | Unk-PNI        |                          | G            |                                   |
| FP002                    | Unk       | Unk-pqd     | Unk-pqd       |                         |             | Unk        | Unk-pqd      | Unk-pqd        |                          |              |                                   |
| FP003                    | Unk       | Unk-PNI     | Unk-PNI       |                         | G           | Unk        | FP001        | FP001          | 6.97E+00                 | G            |                                   |
| FP004                    | Unk       | Unk-PNI     | Unk-PNI       |                         | G           | Unk        | Unk-PNI      | Unk-PNI        |                          | G            |                                   |
| FP005                    | Unk       | Unk-sna     | Unk-sna       |                         |             | Unk        | Unk-sna      | Unk-sna        |                          |              |                                   |
| FP006                    | Unk       | Unk-sna     | Unk-sna       |                         |             | Unk        | Unk-sna      | Unk-sna        |                          |              |                                   |
| FP007                    | Unk       | Unk-PNI     | UnK-PNI       |                         | G           | Unk        | Unk-PNI      | Unk-PNI        |                          | G            |                                   |
| FP008                    | Unk       | UCFC12      | UCFP12        | 6.49E+00                | G           | Unk        | FP001        | FP001          | 5.96E+00                 | G            | 7.14E+00                          |
| FP009                    | Unk       | UCFC15      | UCFP15        | 9.40E+00                | G           | Unk        | FP004        | FP004          | 5.42E+00                 | G            | 4.79E+00                          |
| FP010                    | FP009     | FP009       | FP009         | 8.85E+00                | F G         | Unk        | FP004        | FP004          | 6.33E+00                 | G            | 3.49E+00                          |
| FP011                    | Unk       | FP003       | FP003         | 6.37E+00                | G           | Unk        | FP001        | FP001          | 6.58E+00                 | G            | 4.74E+00                          |
| FP012                    | Unk       | Unk-PNI     | UnK-PNI       |                         | G           | Unk        | FP007        | FP007          | 4.56E+00                 | G            |                                   |
| FP013                    | Unk       | Unk-PNI     | UnK-PNI       |                         | G           | Unk        | FP007        | FP007          | 4.92E+00                 | G            |                                   |
| FP014                    | Unk       | Unk-PNI     | UnK-PNI       |                         | G           | Unk        | Unk-PNI      | Unk-PNI        |                          | G            |                                   |
| FP015                    | Unk       | Unk-PNI     | UnK-PNI       |                         | G           | Unk        | Unk-PNI      | Unk-PNI        |                          | G            |                                   |
| FP016                    | FP014     | FP014       | FP014         | 1.36E+01                | F G         | Unk        | FP025        | FP025          | 1.86E+01                 | G            | 2.01E+01                          |
| FP017                    | Unk       | UCFC15      | UCFP15        | 7.22E+00                | G           | Unk        | Unk-PNI      | Unk-PNI        |                          | G            |                                   |
| FP018                    | Unk       | Unk-PNI     | UnK-PNI       |                         | G           | Unk        | Unk-PNI      | Unk-PNI        |                          | G            |                                   |
| FP019                    | FP011     | FP011       | FP011         | 3.80E+00                | F G TC      | FP012      | FP012        | FP012          | 3.15E+00                 | F G TC       | 5.47E+00                          |
| FP020                    | Unk       | UCFC12      | UCFP12        | 2.63E+00                | G           | Unk        | Unk-PNI      | Unk-PNI        |                          | G            |                                   |
| FP021                    | FP014     | FP014       | FP014         | 1.10E+01                | F G         | Unk        | FP025        | FP025          | 1.90E+01                 | G            | 1.56E+01                          |
| FP022                    | FP015     | FP015       | FP015         | 1.97E+01                | F G         | Unk        | Unk-PNI      | Unk-PNI        |                          | G            |                                   |
| FP023                    | FP015     | FP015       | FP015         | 1.74E+01                | F G         | Unk        | Unk-PNI      | Unk-PNI        |                          | G            |                                   |
| FP024                    | Unk       | UCFC15      | UCFP15        | 3.09E+00                | G           | Unk        | FP012        | FP012          | 8.57E+00                 | G            | 1.23E+01                          |
| FP025                    | Unk       | FP014       | FP014         | 7.57E+00                | G           | Unk        | Unk-PNI      | Unk-PNI        |                          | G            |                                   |
| FP026                    | Unk       | FP011       | FP011         | 3.41E+00                | G T         | Unk        | FP004        | FP004          | 6.32E+00                 | G T          | 7.27E+00                          |
| FP027                    | Unk       | FP015       | FP015         | 2.06E+01                | G           | Unk        | Unk-PNI      | Unk-PNI        |                          | G            |                                   |
| FP028                    | Unk       | FP018       | FP018         | 1.31E+01                | G T         | Unk        | FP012        | FP012          | 5.65E+00                 | G T          | 7.77E+00                          |
| FP029                    | FP011     | FP011       | FP011         | 4.55E+00                | F G TC      | FP020      | FP020        | FP020          | 5.26E+00                 | F G TC       | 8.41E+00                          |
| FP030                    | FP019     | FP019       | FP019         | 3.56E+00                | F G TC      | FP013      | FP013        | FP013          | 6.16E+00                 | F G TC       | 7.34E+00                          |
| FP031                    | Unk       | UCFC15      | UCFP15        | 6.29E+00                | G           | Unk        | FP004        | FP004          | 5.67E+00                 | G            | 4.14E+00                          |
| FP032                    | Unk       | FP031       | FP031         | 4.44E+00                | G T         | Unk        | FP012        | FP012          | 2.15E+00                 | G T          | 4.77E+00                          |
| FP033                    | Unk       | Unk-MMI     | Unk-MMI       |                         | G           | Unk        | Unk-MMI      | Unk-MMI        |                          | G            |                                   |
| FP034                    | FP031     | FP031       | FP031         | 6.06E+00                | F G T       | FP012      | FP012        | FP012          | 3.67E-01                 | F G T        | 3.08E+00                          |
| FP035                    | FP031     | FP031       | FP031         | 4.99E+00                | F G T       | FP012      | FP012        | FP012          | 2.42E+00                 | F G T        | 4.31E+00                          |
| FP036                    | Unk       | FP011       | FP011         | 3.93E+00                | G T         | Unk        | FP004        | FP004          | 5.21E+00                 | G T          | 6.31E+00                          |
| FP037                    | Unk       | FP015       | FP015         | 1.45E+01                | G           | Unk        | Unk-PNI      | Unk-PNI        |                          | G            |                                   |
| FP038                    | Unk       | Unk-PNI     | UnK-PNI       |                         | G           | Unk        | FP007        | FP007          | 7.38E+00                 | G            |                                   |
| FP039                    | Unk       | FP009       | FP009         | 2.14E+00                | G           | Unk        | FP024        | FP024          | 1.71E+00                 | G            | 5.71E+00                          |
| FP040                    | Unk       | FP036       | FP036         | 3.26E+00                | G T         | Unk        | FP017        | FP017          | 2.04E+00                 | G T          | 3.19E+00                          |
| FP041                    | Unk       | FP036       | FP036         | 3.68E+00                | G T         | Unk        | FP017        | FP017          | 6.28E+00                 | G T          | 8.25E+00                          |
| FP042                    | FP014     | FP014       | FP014         | 4.41E+00                | F G TC      | FP016      | FP016        | FP016          | 1.10E+01                 | F G TC       | 1.16E+01                          |
| FP043                    | FP019     | FP019       | FP019         | 5.02E+00                | F G TC      | FP012      | FP012        | FP012          | 8.08E+00                 | F G TC       | 7.90E+00                          |
| FP044                    | FP040     | FP040       | FP040         | 3.99E+00                | F G TC      | FP026      | FP026        | FP026          | 5.69E+00                 | F G TC       | 7.95E+00                          |
| FP045                    | FP019     | FP019       | FP019         | 5.57E+00                | F G TC      | FP012      | FP012        | FP012          | 5.25E+00                 | F G TC       | 7.19E+00                          |
| FP046                    | Unk       | FP036       | FP036         | 3.82E+00                | G T         | Unk        | FP017        | FP017          | 6.60E+00                 | G T          | 8.67E+00                          |
| FP047                    | FP011     | FP011       | FP011         | 4.19E+00                | F G TC      | FP012      | FP012        | FP012          | 4.89E+00                 | F G TC       | 6.68E+00                          |
| FP048                    | FP031     | FP031       | FP031         | 2.23E+00                | F G TC      | FP012      | FP012        | FP012          | 3.84E+00                 | F G TC       | 6.89E+00                          |
| FP049                    | Unk       | FP036       | FP036         | 4.91E+00                | G T         | Unk        | FP017        | FP017          | 9.26E+00                 | G T          | 1.03E+01                          |
| FP050                    | FP036     | FP036       | FP036         | 6.86E+00                | F G TC      | FP026      | FP026        | FP026          | 5.38E+00                 | F G TC       | 4.85E+00                          |
| FP051                    | Unk       | FP036       | FP036         | 4.71E+00                | G T         | Unk        | FP017        | FP017          | 8.21E+00                 | G T          | 9.10E+00                          |
| FP052                    | FP031     | FP031       | FP031         | 1.99E+00                | F G TC      | FP012      | FP012        | FP012          | 3.32E+00                 | F G TC       | 5.76E+00                          |
| FP053                    | FP019     | FP019       | FP019         | 7.80E+00                | F G T       | FP012      | FP012        | FP012          | 5.36E+00                 | F G T        | 6.68E+00                          |
| FP054                    | FP040     | FP040       | FP040         | 2.06E+00                | F G         | FP028      | FP028        | FP028          | 7.94E+00                 | F G          | 1.22E+01                          |
| FP055                    | FP023     | FP023       | FP023         | 1.22E+01                | F G TC      | FP042      | FP042        | FP042          | 1.43E+01                 | F G TC       | 2.20E+01                          |
| FP056                    | Unk       | FP019       | FP019         | 6.31E+00                | GT          | Unk        | FP012        | FP012          | 6.56E+00                 | G T          | 8.93E+00                          |
| FP057                    | Unk       | FP011       | FP011         | 3.88E+00                | G T         | Unk        | FP012        | FP012          | 3.39E+00                 | G T          | 4.23E+00                          |

### DAM IDENTIFICATION

### SIRE IDENTIFICATION

| Field ID & Genetic group | Field Dam | Genetic Dam | Dam Consensus       | Dam-offspring LOD score | Dam support | Field Sire | Genetic Sire | Sire Consensus      | Sire Offspring LOD score | Sire support | Dame Sire and offspring LOD score |
|--------------------------|-----------|-------------|---------------------|-------------------------|-------------|------------|--------------|---------------------|--------------------------|--------------|-----------------------------------|
| FP058                    | FP056     | FP056       | FP056               | 9.91E+00                | F G T       | Unk        | FP045        | FP045               | 9.78E+00                 | G T          | 9.36E+00                          |
| FP059                    | FP048     | FP048       | FP048               | 4.41E+00                | F G         | Unk        | FP068        | FP068               | 7.48E+00                 | G T          | 1.09E+01                          |
| FP060                    | FP040     | FP040       | FP040               | 4.84E+00                | F G T       | Unk        | FP045        | FP045               | 4.03E+00                 | G T          | 6.05E+00                          |
| FP061F1                  | TX108     | TX108       | TX108               | 1.51E+01                | F G TC      | FP016      | FP016        | FP016               | 1.79E+01                 | F G TC       | 2.41E+01                          |
| FP062                    | FP048     | FP048       | FP048               | 8.39E+00                | F G T       | Unk        | FP051        | FP051               | 5.81E+00                 | G T          | 6.37E+00                          |
| FP063                    | Unk       | FP040       | FP040               | 4.07E+00                | G T         | Unk        | FP045        | FP045               | 6.57E+00                 | G T          | 8.02E+00                          |
| FP064                    | FP048     | FP048       | FP048               | 4.73E+00                | F G T       | Unk        | FP051        | FP051               | 7.11E+00                 | G T          | 8.41E+00                          |
| FP065 / K035F1           | TX101     | TX101       | TX101               | 8.89E+00                | F G TC      | FP045      | FP045        | FP045               | 9.00E-01                 | F G TC       | 7.83E+00                          |
| FP066 / K036F1           | TX101     | TX101       | TX101               | 7.25E+00                | F G TC      | FP045      | FP045        | FP045               | -1.64E+00                | F G TC       | 5.85E+00                          |
| FP067                    | FP056     | FP056       | FP056               | 9.51E+00                | F G TC      | FP045      | FP045        | FP045               | 8.21E+00                 | F G TC       | 8.10E+00                          |
| FP068                    | Unk       | FP049       | FP049               | 4.98E+00                | G T         | Unk        | FP045        | FP045               | 3.63E+00                 | G T          | 7.74E+00                          |
| FP069                    | FP040     | FP040       | FP040               | 2.53E+00                | F G T       | FP045      | FP045        | FP045               | 4.75E+00                 | F G T        | 6.39E+00                          |
| FP070 / K039             | TX107     | TX107       | TX107               | 1.21E+01                | F G         | Unk        | FP079        | FP079 <sub>F1</sub> | 5.90E+00                 | G T          | 6.25E+00                          |
| FP071 / K038             | TX107     | TX107       | TX107               | 2.09E+01                | F G         | Unk        | FP079        | FP079 <sub>F1</sub> | 2.04E+00                 | G T          | 6.33E+00                          |
| FP072                    | Unk       | FP057       | FP057               | 6.15E+00                | G           | Unk        | Unk-PNI      | Unk-PNI             |                          | G            |                                   |
| FP073 / K018F1           | TX101     | TX101       | TX101               | 9.90E+00                | F G         | Unk        | Unk-PNI      | Unk-PNI             |                          | G            |                                   |
| FP074                    | FP073     | FP073       | FP073 <sub>F1</sub> | 4.64E+00                | F G T       | Unk        | FP068        | FP068               | 2.89E+00                 | G TC         | 6.40E+00                          |
| FP075                    | FP048     | FP048       | FP048               | 7.03E+00                | F G T       | FP068      | FP045        | FP045               | 3.78E+00                 | G T          | 4.69E+00                          |
| FP076                    | Unk       | FP049       | FP049               | 6.46E+00                | G T         | Unk        | FP045        | FP045               | 2.13E+00                 | G T          | 6.05E+00                          |
| FP077                    | Unk       | FP073       | FP073 <sub>F1</sub> | 1.03E+01                | G T         | Unk        | FP068        | FP068               | 1.72E+00                 | G TC         | 6.50E+00                          |
| FP078                    | Unk       | FP057       | FP057               | 4.81E+00                | G           | Unk        | FP054        | FP054               | 3.34E+00                 | G            | 4.24E+00                          |
| FP079 / K019F1           | TX101     | TX101       | TX101               | 8.41E+00                | F G         | Unk        | Unk-PNI      | Unk-PNI             |                          | G            |                                   |
| FP080                    | Unk       | FP049       | FP049               | 5.71E+00                | G           | Unk        | FP046        | FP046               | 9.39E+00                 | G            | 9.45E+00                          |
| FP081                    | Unk       | Unk-MMI     | Unk-MMI             |                         | G           | Unk        | Unk-MMI      | Unk-MMI             |                          | G            |                                   |
| FP082                    | Unk       | Unk-MMI     | Unk-MMI             |                         | G           | Unk        | Unk-MMI      | Unk-MMI             |                          | G            |                                   |
| FP083 / K62F1            | TX106     | TX106       | TX106               | 1.73E+01                | F G         | FP054/060  | FP060        | FP060               | -1.49E+00                | F G          | 6.34E+00                          |
| FP084                    | FP073     | FP073       | FP073 <sub>F1</sub> | 5.15E+00                | F G TC      | Unk        | FP072        | FP072               | 2.99E+00                 | G TC         | 6.62E+00                          |
| FP085 / K059             | FP061     | FP061       | FP061 <sub>F1</sub> | 2.61E+01                | F G TC      | FP016      | FP016        | FP016               | 2.62E+01                 | F G TC       | 1.99E+01                          |
| FP086 / K068             | FP071     | FP071       | FP071               | 1.10E+01                | F G TC      | FP079      | FP079        | FP079 <sub>F1</sub> | 8.24E+00                 | F G TC       | 8.62E+00                          |
| FP087 / K060             | FP055     | FP055       | FP055               | 1.36E+01                | F G T       | FP079      | FP079        | FP079 <sub>F1</sub> | 5.44E+00                 | G T          | 9.21E+00                          |
| FP088 / K064             | FP070     | FP070       | FP070               | 1.10E+01                | F G TC      | FP079      | FP079        | FP079 <sub>F1</sub> | 7.69E+00                 | F G TC       | 7.84E+00                          |
| FP089                    | Unk       | Unk-MMI     | Unk-MMI             |                         | G           | Unk        | Unk-MMI      | Unk-MMI             |                          | G            |                                   |
| FP090 / K067             | FP071     | FP071       | FP071               | 1.33E+01                | F G TC      | FP079      | FP079        | FP079 <sub>F1</sub> | 6.44E+00                 | F G TC       | 8.70E+00                          |
| FP091 / K066             | FP070     | FP070       | FP070               | 8.39E+00                | F G TC      | FP079      | FP079        | FP079 <sub>F1</sub> | 3.31E+00                 | F G TC       | 4.56E+00                          |
| FP092 / K065             | FP070     | FP070       | FP070               | 9.90E+00                | F G TC      | FP079      | FP079        | FP079 <sub>F1</sub> | 5.18E+00                 | F G TC       | 5.02E+00                          |
| FP093 / K058             | TX107     | TX107       | TX107               | 2.09E+01                | F G         | FP079?     | FP079        | FP079 <sub>F1</sub> | 3.04E+00                 | F G T        | 7.04E+00                          |
| FP094F1                  | TX105     | TX105       | TX105               | 2.58E+01                | F G TC      | FP016      | FP016        | FP016               | 1.02E+01                 | F G TC       | 2.02E+01                          |
| FP095 / K045F1           | TX108     | TX108       | TX108               | 2.44E+01                | F G TC      | FP016      | FP016        | FP016               | 1.52E+01                 | F G TC       | 1.95E+01                          |
| FP096 / K080             | FP078     | FP078       | FP078               | 7.11E+00                | F G         | FP059      | Unk-PNI      | Unk-PNI             |                          | G            |                                   |
| FP097                    | FP105     | FP105       | FP105               | 4.74E+00                | F G T       | Unk        | FP100/63     | FP063               | 4.49E+00                 | G T          | 4.41E+00                          |
| FP098                    | Unk       | Unk-MMI     | Unk-MMI             |                         | G           | Unk        | Unk-MMI      | Unk-MMI             |                          | G            |                                   |
| FP099                    | FP105     | FP105       | FP105               | 5.97E+00                | F G T       | Unk        | FP100/63     | FP063               | 7.19E+00                 | G T          | 7.45E+00                          |
| FP100                    | Unk       | Unk-MMI     | Unk-MMI             |                         | G           | Unk        | Unk-MMI      | Unk-MMI             |                          | G            |                                   |
| FP101                    | Unk       | Unk-MMI     | Unk-MMI             |                         | G           | Unk        | Unk-MMI      | Unk-MMI             |                          | G            |                                   |
| FP102 / K048             | FP055     | FP055       | FP055               | 1.57E+01                | F G T       | Unk        | FP079        | FP079 <sub>F1</sub> | 7.90E+00                 | G T          | 1.30E+01                          |
| FP103                    | FP102     | FP102       | FP102               | 1.66E+01                | F G T       | Unk        | FP079        | FP079 <sub>F1</sub> | 9.53E+00                 | G T          | 6.57E+00                          |
| FP104                    | Unk       | FP070       | FP070               | 1.51E+01                | G           | FP079      | FP079        | FP079 <sub>F1</sub> | 1.14E+01                 | G T          | 1.22E+01                          |
| FP105                    | FP019     | FP019       | FP019               | 4.05E+00                | F G TC      | Unk        | FP012        | FP012               | 3.77E+00                 | G TC         | 4.90E+00                          |
| FP106                    | FP105     | FP105       | FP105               | 5.47E+00                | F G T       | Unk        | FP063        | FP063               | 7.23E+00                 | G T          | 7.30E+00                          |
| FP107 / K079             | FP078     | FP078       | FP078               | 8.43E+00                | F G         | FP059      | Unk-MMI      | Unk-MMI             |                          | F G          |                                   |
| FP108 / K090             | FP087     | FP087       | FP087               | 1.06E+01                | F G         | FP079      | FP079        | FP079 <sub>F1</sub> | 1.22E+00                 | F G TC       | 3.83E+00                          |
| FP109                    | Unk       | Unk-MMI     | Unk-MMI             |                         | G           | Unk        | Unk-MMI      | Unk-MMI             |                          | G            |                                   |
| FP110 / K086             | FP082     | FP082       | FP082               | 3.30E+00                | F G TC      | FP065      | FP065        | FP065 <sub>F1</sub> | 2.66E+00                 | F G TC       | 8.33E+00                          |
| FP111                    | Unk       | FP036       | FP036               | 2.97E+00                | G           | Unk        | Unk-PNI      | Unk-PNI             |                          | G            |                                   |
| FP112                    | Unk       | Unk-MMI     | Unk-MMI             |                         | G           | Unk        | Unk-MMI      | Unk-MMI             |                          | G            |                                   |
| FP113                    | FP078     | FP078       | FP078               | 7.80E+00                | F G TC      | FP059      | FP059        | FP059               | 4.81E+00                 | F G TC       | 3.78E+00                          |
| FP114                    | FP078     | FP078       | FP078               | 6.23E+00                | F G TC      | FP059      | FP059        | FP059               | 3.92E+00                 | F G TC       | 3.35E+00                          |
| FP115                    | Unk       | FP082       | FP082               | 6.40E+00                | G T         | Unk        | UCFP26       | UCFP26              | 4.38E+00                 | G            | 6.62E+00                          |

Table S2

### DAM IDENTIFICATION

### SIRE IDENTIFICATION

| Field ID & Genetic group | Field Dam | Genetic Dam | Dam Consensus       | Dam-offspring LOD score | Dam support | Field Sire | Genetic Sire | Sire Consensus      | Sire Offspring LOD score | Sire support | Dame Sire and offspring LOD score |
|--------------------------|-----------|-------------|---------------------|-------------------------|-------------|------------|--------------|---------------------|--------------------------|--------------|-----------------------------------|
| FP116                    | FP067     | FP067       | FP067               | 7.26E+00                | F G TC      | Unk        | FP098        | FP098               | 5.57E+00                 | G TC         | 7.35E+00                          |
| FP117                    | Unk       | FP077       | FP077               | 8.70E-01                | G T         | Unk        | Unk-PNI      | Unk-PNI             |                          | G            |                                   |
| FP118                    | Unk       | FP077       | FP077               | -2.02E+00               | G T         | Unk        | Unk-PNI      | Unk-PNI             |                          | G            |                                   |
| FP119 / K115             | FP093     | FP093       | FP093               | 8.98E+00                | F G TC      | FP079      | FP079        | FP079 <sub>F1</sub> | 6.46E+00                 | F G TC       | 5.72E+00                          |
| FP120                    | Unk       | FP070       | FP070               | 1.08E+01                | G T         | Unk        | FP079        | FP079 <sub>F1</sub> | 7.74E+00                 | G T          | 4.54E+00                          |
| FP121                    | Unk       | UCFP57      | UCFP57              | 0.00E+00                | G           | Unk        | Unk-PNI      | Unk-PNI             |                          | G            |                                   |
| FP122                    | Unk       | Unk-MMI     | Unk-MMI             |                         | G           | Unk        | Unk-MMI      | Unk-MMI             |                          | G            |                                   |
| FP123                    | Unk       | Unk-MMI     | Unk-MMI             |                         | G           | Unk        | Unk-MMI      | Unk-MMI             |                          | G            |                                   |
| FP124                    | Unk       | Unk-PNI     | Unk-PNI             |                         | G           | Unk        | Unk-PNI      | Unk-PNI             |                          | G            |                                   |
| FP125                    | FP124     | FP124       | FP124               | 2.76E+00                | F G         | Unk        | Unk-PNI      | Unk-PNI             |                          | G            |                                   |
| FP126                    | FP124     | FP124       | FP124               | 9.95E+00                | F G         | Unk        | Unk-PNI      | Unk-PNI             |                          | G            |                                   |
| FP127                    | Unk       | FP070       | FP070               | 1.30E+01                | G T         | Unk        | FP079        | FP079 <sub>F1</sub> | 5.32E+00                 | G T          | 3.65E+00                          |
| FP128 / K082             | FP077     | FP077       | FP077               | 4.08E+00                | F G T       | Unk        | FP100        | FP100               | 4.58E+00                 | G T          | 7.70E+00                          |
| FP129 / K089             | FP087     | FP087       | FP087               | 9.75E+00                | F G         | FP079      | FP079        | FP079 <sub>F1</sub> | 4.72E+00                 | F G TC       | 3.18E+00                          |
| FP130 / K150             | FP110     | FP110       | FP110               | 4.47E+00                | F G         | Unk        | Unk-PNI      | Unk-PNI             |                          | G            |                                   |
| FP131                    | Unk       | Unk-PNI     | Unk-PNI             |                         | G           | Unk        | Unk-PNI      | Unk-PNI             |                          | G            |                                   |
| FP132                    | Unk       | Unk-PNI     | Unk-PNI             |                         | G           | Unk        | Unk-PNI      | Unk-PNI             |                          | G            |                                   |
| FP133                    | Unk       | Unk-MMI     | Unk-MMI             |                         | G           | Unk        | Unk-MMI      | Unk-MMI             |                          | G            |                                   |
| FP134                    | Unk       | Unk-MMI     | Unk-MMI             |                         | G           | Unk        | Unk-MMI      | Unk-MMI             |                          | G            |                                   |
| FP135 / K147             | FP101     | FP101       | FP101               | 3.34E+00                | F G TC      | FP065/100  | FP065        | FP065 <sub>F1</sub> | 5.47E+00                 | F G TC       | 1.23E+01                          |
| FP136                    | Unk       | Unk-MMI     | Unk-MMI             |                         | G           | Unk        | Unk-MMI      | Unk-MMI             |                          | G            |                                   |
| FP137                    | Unk       | Unk-MMI     | Unk-MMI             |                         | G           | Unk        | Unk-MMI      | Unk-MMI             |                          | G            |                                   |
| FP138                    | Unk       | Unk-MMI     | Unk-MMI             |                         | G           | Unk        | Unk-MMI      | Unk-MMI             |                          | G            |                                   |
| FP139                    | FP075     | FP075       | FP075               | 4.20E+00                | F G TC      | FP098/100  | FP098        | FP098               | 5.28E+00                 | F G TC       | 6.45E+00                          |
| FP140                    | Unk       | Unk-MMI     | Unk-MMI             |                         | G           | Unk        | Unk-MMI      | Unk-MMI             |                          | G            |                                   |
| FP141                    | Unk       | Unk-MMI     | Unk-MMI             |                         | G           | Unk        | Unk-MMI      | Unk-MMI             |                          | G            |                                   |
| FP142                    | Unk       | FP061       | FP061 <sub>F1</sub> | 2.83E+01                | G           | Unk        | FP085        | FP085               | 3.22E+01                 | G            | 2.89E+01                          |
| FP143                    | Unk       | Unk-PNI     | Unk-PNI             |                         | G           | Unk        | Unk-PNI      | Unk-PNI             |                          | G            |                                   |
| FP144                    | Unk       | Unk-PNI     | Unk-PNI             |                         | G           | Unk        | Unk-PNI      | Unk-PNI             |                          | G            |                                   |
| FP145                    | Unk       | K049        | K049                | 9.77E+00                | G           | Unk        | Unk-PNI      | Unk-PNI             |                          | G            |                                   |
| FP146                    | Unk       | FP083       | FP083 <sub>F1</sub> | 9.08E+00                | G           | Unk        | Unk-MMI      | Unk-MMI             |                          | G            |                                   |
| FP147 / K184             | FP129     | FP129       | FP129               | 2.61E+00                | F G         | Unk        | Unk-PNI      | Unk-PNI             |                          | G            |                                   |
| FP148                    | Unk       | FP083       | FP083 <sub>F1</sub> | 1.19E+01                | G T         | Unk        | Unk-PNI      | Unk-PNI             |                          | G            |                                   |
| FP149                    | Unk       | K062        | K062 <sub>F1</sub>  | 7.07E+00                | G           | Unk        | Unk-MMI      | Unk-MMI             |                          | G            |                                   |
| FP150 / K152             | FP093     | FP093       | FP093               | 8.94E+00                | F G TC      | FP060      | FP060        | FP060               | 2.80E+00                 | F G TC       | 8.58E+00                          |
| FP151 / K113             | FP093     | FP093       | FP093               | 1.37E+01                | F G TC      | FP079      | FP079        | FP079 <sub>F1</sub> | 8.64E+00                 | F G TC       | 9.74E+00                          |
| FP152                    | Unk       | Unk-MMI     | Unk-MMI             |                         | G           | Unk        | Unk-MMI      | Unk-MMI             |                          | G            |                                   |
| FP153                    | Unk       | Unk-MMI     | Unk-MMI             |                         | G           | Unk        | FP079        | FP079 <sub>F1</sub> | 9.51E+00                 | G            |                                   |
| FP154                    | Unk       | Unk-MMI     | Unk-MMI             |                         | G           | Unk        | Unk-MMI      | Unk-MMI             |                          | G            |                                   |
| FP155                    | Unk       | Unk-PNI     | Unk-PNI             |                         | G           | Unk        | Unk-PNI      | Unk-PNI             |                          | G            |                                   |
| FP156                    | Unk       | Unk-MMI     | Unk-MMI             |                         | G           | Unk        | Unk-MMI      | Unk-MMI             |                          | G            |                                   |
| FP157                    | Unk       | Unk-MMI     | Unk-MMI             |                         | G           | Unk        | Unk-MMI      | Unk-MMI             |                          | G            |                                   |
| FP158                    | Unk       | Unk-PNI     | Unk-PNI             |                         | G           | Unk        | K093         | FP181 / K093        | 7.55E+00                 | G            |                                   |
| FP159                    | Unk       | Unk-MMI     | Unk-MMI             |                         | G           | Unk        | Unk-MMI      | Unk-MMI             |                          | G            |                                   |
| FP160                    | Unk       | Unk-MMI     | Unk-MMI             |                         | G           | Unk        | Unk-MMI      | Unk-MMI             |                          | G            |                                   |
| FP161 / K169             | FP070     | FP070       | FP070               | 8.06E+00                | F G         | Unk        | FP079        | FP079 <sub>F1</sub> | 1.55E+00                 | G T          | 3.48E+00                          |
| FP162                    | Unk       | Unk-pqd     | Unk-pqd             |                         |             | Unk        | Unk-pqd      | Unk-pqd             |                          |              |                                   |
| FP163 / K227             | FP093     | FP093       | FP093               | 1.27E+01                | F G T       | Unk        | FP133        | FP133               | 7.33E+00                 | G T          | 1.00E+01                          |
| FP164                    | Unk       | Unk-pqd     | Unk-pqd             |                         |             | Unk        | Unk-pqd      | Unk-pqd             |                          |              |                                   |
| FP165                    | Unk       | Unk-ND      | Unk-ND              |                         |             | Unk        | Unk-ND       | Unk-ND              |                          |              |                                   |
| FP166                    | Unk       | Unk-ND      | Unk-ND              |                         |             | Unk        | Unk-ND       | Unk-ND              |                          |              |                                   |
| FP167                    | Unk       | Unk-ND      | Unk-ND              |                         |             | Unk        | Unk-ND       | Unk-ND              |                          |              |                                   |
| FP168                    | Unk       | Unk-ND      | Unk-ND              |                         |             | Unk        | Unk-ND       | Unk-ND              |                          |              |                                   |
| FP169                    | Unk       | Unk-ND      | Unk-ND              |                         |             | Unk        | Unk-ND       | Unk-ND              |                          |              |                                   |
| FP170                    | Unk       | Unk-ND      | Unk-ND              |                         |             | Unk        | Unk-ND       | Unk-ND              |                          |              |                                   |
| FP171                    | Unk       | Unk-ND      | Unk-ND              |                         |             | Unk        | Unk-ND       | Unk-ND              |                          |              |                                   |
| FP172                    | Unk       | Unk-ND      | Unk-ND              |                         |             | Unk        | Unk-ND       | Unk-ND              |                          |              |                                   |
| FP173                    | Unk       | Unk-ND      | Unk-ND              |                         |             | Unk        | Unk-ND       | Unk-ND              |                          |              |                                   |



### DAM IDENTIFICATION

### SIRE IDENTIFICATION

| Field ID & Genetic group | Field Dam | Genetic Dam | Dam Consensus | Dam-offspring LOD score | Dam support | Field Sire | Genetic Sire | Sire Consensus | Sire Offspring LOD score | Sire support | Dame Sire and offspring LOD score |
|--------------------------|-----------|-------------|---------------|-------------------------|-------------|------------|--------------|----------------|--------------------------|--------------|-----------------------------------|
| FP174                    | Unk       | Unk-ND      | Unk-ND        |                         |             | Unk        | Unk-ND       | Unk-ND         |                          |              |                                   |
| FP175 / K254             | FP150     | FP150       | FP150         | 5.17E+00                | F G         | TBD        | FP138        | FP138          | 2.15E+00                 | G            | 5.23E+00                          |
| FP176                    | Unk       | Unk-ND      | Unk-ND        |                         |             | Unk        | Unk-ND       | Unk-ND         |                          |              |                                   |
| FP177 / K235             | FP113     | FP113       | FP113         | 9.70E-01                | F G         | FP119      | FP154        | FP154          | 9.14E+00                 | G            | 1.32E+01                          |
| FP178                    | Unk       | Unk-ND      | Unk-ND        |                         |             | Unk        | Unk-ND       | Unk-ND         |                          |              |                                   |
| FP179                    | Unk       | Unk-ND      | Unk-ND        |                         |             | Unk        | Unk-ND       | Unk-ND         |                          |              |                                   |
| FP180 / K264             | FP151     | FP151       | FP151         | 5.94E+00                | F G         | Unk        | FP138        | FP138          | -1.25E+00                | G            | 2.52E+00                          |
| FP181 / K093             | TX106     | TX106       | TX106         | 1.71E+01                | F G         | FP060      | Unk-PNI      | Unk-PNI        |                          | G            |                                   |
| FP182 / K279             | FP161     | Unk-ND      | FP161         |                         | F           | Unk        | Unk-ND       | Unk-ND         |                          |              |                                   |
| FP200 "Big Guy"          | Unk       | Unk-PNI     | Unk-PNI       |                         | G           | Unk        | Unk-PNI      | Unk-PNI        |                          | G            |                                   |
| FP201                    | FP031     | FP031       | FP031         | 4.57E+00                | F G TC      | FP012      | FP012        | FP012          | 2.76E+00                 | F G TC       | 5.72E+00                          |
| FP202                    | FP009     | FP009       | FP009         | 9.77E+00                | F G TC      | FP037      | FP037        | FP037          | 1.78E+01                 | F G TC       | 1.95E+01                          |
| FP203                    | FP009     | FP009       | FP009         | 9.73E+00                | F G TC      | FP037      | FP037        | FP037          | 1.73E+01                 | F G TC       | 1.91E+01                          |
| FP204                    | FP031     | FP031       | FP031         | 3.92E+00                | F G TC      | FP012      | FP012        | FP012          | 4.44E+00                 | F G TC       | 8.65E+00                          |
| FP205                    | FP019     | FP019       | FP019         | 7.20E+00                | F G TC      | FP012      | FP012        | FP012          | 6.10E+00                 | F G TC       | 5.92E+00                          |
| FP206                    | FP040     | FP040       | FP040         | 5.00E+00                | F G TC      | FP026      | FP026        | FP026          | 5.51E+00                 | F G TC       | 7.18E+00                          |
| FP207                    | FP036     | FP036       | FP036         | 5.15E+00                | F G TC      | FP026      | FP026        | FP026          | 9.37E+00                 | F G TC       | 9.19E+00                          |
| FP208                    | FP032     | FP032       | FP032         | 7.47E+00                | F G TC      | FP012      | FP012        | FP012          | 4.26E+00                 | F G TC       | 4.59E+00                          |
| FP209                    | FP023     | FP023       | FP023         | 2.18E+01                | F G TC      | FP042      | FP042        | FP042          | 3.02E+00                 | F G TC       | 6.53E+00                          |
| FP210                    | FP023     | FP023       | FP023         | 1.18E+01                | F G TC      | FP042      | FP042        | FP042          | 7.18E+00                 | F G TC       | 9.76E+00                          |
| UCFP002                  | Unk       | Unk-PNI     | Unk-PNI       |                         | G           | Unk        | Unk-PNI      | Unk-PNI        |                          | G            |                                   |
| UCFP003                  | Unk       | Unk-pqd     | Unk-pqd       |                         |             | Unk        | Unk-pqd      | Unk-pqd        |                          |              |                                   |
| UCFP004                  | Unk       | Unk-pqd     | Unk-pqd       |                         |             | Unk        | Unk-pqd      | Unk-pqd        |                          |              |                                   |
| UCFP005                  | Unk       | Unk-PNI     | Unk-PNI       |                         | G           | Unk        | Unk-PNI      | Unk-PNI        |                          | G            |                                   |
| UCFP006                  | Unk       | Unk-PNI     | Unk-PNI       |                         | G           | Unk        | Unk-PNI      | Unk-PNI        |                          | G            |                                   |
| UCFP007                  | UCFP06    | Unk-pqd     | UCFP06        |                         | F           | Unk        | Unk-pqd      | Unk-pqd        |                          |              |                                   |
| UCFP008                  | Unk       | Unk-PNI     | Unk-PNI       |                         | G           | Unk        | Unk-PNI      | Unk-PNI        |                          | G            |                                   |
| UCFP009                  | Unk       | FP003       | Unk-PNI       |                         | G           | Unk        | FP001        | FP001          | 6.28E+00                 | G            |                                   |
| UCFP010                  | Unk       | Unk-PNI     | Unk-PNI       |                         | G           | Unk        | Unk-PNI      | Unk-PNI        |                          | G            |                                   |
| UCFP011                  | Unk       | Unk-PNI     | Unk-PNI       |                         | G           | Unk        | Unk-PNI      | Unk-PNI        |                          | G            |                                   |
| UCFP012                  | Unk       | FP003       | FP003         | 3.22E+00                | G           | Unk        | Unk-PNI      | Unk-PNI        |                          | G            |                                   |
| UCFP013                  | Unk       | Unk-pqd     | Unk-pqd       |                         |             | Unk        | Unk-pqd      | Unk-pqd        |                          |              |                                   |
| UCFP014                  | Unk       | Unk-pqd     | Unk-pqd       |                         |             | Unk        | Unk-pqd      | Unk-pqd        |                          |              |                                   |
| UCFP015                  | Unk       | Unk-PNI     | Unk-PNI       |                         | G           | Unk        | Unk-PNI      | Unk-PNI        |                          | G            |                                   |
| UCFP017                  | Unk       | Unk-pqd     | Unk-pqd       |                         |             | Unk        | Unk-pqd      | Unk-pqd        |                          |              |                                   |
| UCFP018                  | Unk       | Unk-MMI     | Unk-MMI       |                         | G           | Unk        | Unk-MMI      | Unk-MMI        |                          | G            |                                   |
| UCFP019                  | Unk       | Unk-PNI     | Unk-PNI       |                         | G           | Unk        | FP033        | FP033          | 7.85E+00                 | G            |                                   |
| UCFP020                  | FP011     | FP011       | FP011         | 4.50E+00                | F G TC      | FP012      | FP012        | FP012          | 2.24E+00                 | F G TC       | 3.26E+00                          |
| UCFP021                  | FP019     | FP019       | FP019         | 5.72E+00                | F G T       | FP012      | FP012        | FP012          | 4.99E+00                 | F G T        | 4.21E+00                          |
| UCFP022                  | Unk       | Unk-MMI     | Unk-MMI       |                         | G           | Unk        | Unk-MMI      | Unk-MMI        |                          | G            |                                   |
| UCFP023                  | FP052     | FP052       | FP052         | 3.27E+00                | F G TC      | FP046      | FP046        | FP046          | 6.49E+00                 | F G TC       | 6.79E+00                          |
| UCFP024                  | FP032     | Unk-sna     | FP032         |                         | F           | Unk        | Unk-sna      | Unk-sna        |                          |              |                                   |
| UCFP025                  | Unk       | Unk-MMI     | Unk-MMI       |                         | G           | Unk        | Unk-MMI      | Unk-MMI        |                          | G            |                                   |
| UCFP026                  | Unk       | FP019       | FP019         | 5.81E+00                | G T         | Unk        | FP012        | FP012          | 7.00E+00                 | G TC         | 9.36E+00                          |
| UCFP027                  | Unk       | Unk-MMI     | Unk-MMI       |                         | G           | Unk        | Unk-MMI      | Unk-MMI        |                          | G            |                                   |
| UCFP028                  | Unk       | Unk-MMI     | Unk-MMI       |                         | G           | Unk        | Unk-MMI      | Unk-MMI        |                          | G            |                                   |
| UCFP029                  | Unk       | Unk-MMI     | Unk-MMI       |                         | G           | Unk        | Unk-MMI      | Unk-MMI        |                          | G            |                                   |
| UCFP030                  | Unk       | Unk-pqd     | Unk-pqd       |                         |             | Unk        | Unk-pqd      | Unk-pqd        |                          |              |                                   |
| UCFP031                  | Unk       | Unk-pqd     | Unk-pqd       |                         |             | Unk        | Unk-pqd      | Unk-pqd        |                          |              |                                   |
| UCFP032                  | Unk       | Unk-sna     | Unk-sna       |                         |             | Unk        | Unk-sna      | Unk-sna        |                          |              |                                   |
| UCFP033                  | Unk       | Unk-PNI     | Unk-PNI       |                         | G           | Unk        | Unk-PNI      | Unk-PNI        |                          | G            |                                   |
| UCFP034                  | Unk       | Unk-PNI     | Unk-PNI       |                         | G           | Unk        | Unk-PNI      | Unk-PNI        |                          | G            |                                   |
| UCFP035                  | Unk       | Unk-MMI     | Unk-MMI       |                         | G           | Unk        | Unk-MMI      | Unk-MMI        |                          | G            |                                   |
| UCFP036                  | Unk       | Unk-MMI     | Unk-MMI       |                         | G           | Unk        | Unk-MMI      | Unk-MMI        |                          | G            |                                   |
| UCFP037                  | Unk       | Unk-MMI     | Unk-MMI       |                         | G           | Unk        | Unk-MMI      | Unk-MMI        |                          | G            |                                   |
| UCFP038                  | Unk       | Unk-PNI     | Unk-PNI       |                         | G           | Unk        | Unk-PNI      | Unk-PNI        |                          | G            |                                   |
| UCFP039                  | Unk       | Unk-PNI     | Unk-PNI       |                         | G           | Unk        | FP060        | FP060          | 1.64E+00                 | G            |                                   |
| UCFP040                  | Unk       | Unk-PNI     | Unk-PNI       |                         | G           | Unk        | FP060        | FP060          | 1.55E+00                 | G            |                                   |

### DAM IDENTIFICATION

### SIRE IDENTIFICATION

| Field ID & Genetic group | Field Dam | Genetic Dam | Dam Consensus       | Dam-offspring LOD score | Dam support | Field Sire | Genetic Sire | Sire Consensus      | Sire Offspring LOD score | Sire support | Dame Sire and offspring LOD score |
|--------------------------|-----------|-------------|---------------------|-------------------------|-------------|------------|--------------|---------------------|--------------------------|--------------|-----------------------------------|
| UCFP041                  | Unk       | Unk-MMI     | Unk-MMI             |                         | G           | Unk        | Unk-MMI      | Unk-MMI             |                          | G            |                                   |
| UCFP042                  | Unk       | Unk-PNI     | Unk-PNI             |                         | G           | Unk        | Unk-PNI      | Unk-PNI             |                          | G            |                                   |
| UCFP043                  | Unk       | Unk-MMI     | Unk-MMI             |                         | G           | Unk        | Unk-MMI      | Unk-MMI             |                          | G            |                                   |
| UCFP044                  | FP036     | Unk-pqd     | FP036               |                         | F           | FP045      | Unk-pqd      | FP045               |                          | F T(C?)      |                                   |
| UCFP045                  | Unk       | Unk-MMI     | Unk-MMI             |                         | G           | Unk        | Unk-MMI      | Unk-MMI             |                          | G            |                                   |
| UCFP046                  | Unk       | Unk-MMI     | Unk-MMI             |                         | G           | Unk        | Unk-MMI      | Unk-MMI             |                          | G            |                                   |
| UCFP047                  | Unk       | Unk-pqd     | Unk-pqd             |                         |             | Unk        | Unk-pqd      | Unk-pqd             |                          |              |                                   |
| UCFP048                  | Unk       | Unk-MMI     | Unk-MMI             |                         | G           | Unk        | Unk-MMI      | Unk-MMI             |                          | G            |                                   |
| UCFP049 /K98             | FP067     | FP067       | FP067               | 4.91E+00                | F G         | Unk        | Unk-PNI      | Unk-PNI             |                          | G            |                                   |
| UCFP050                  | FP048     | FP048       | FP048               | 7.89E+00                | F G T       | Unk        | FP051        | FP051               | 5.02E+00                 | G T          | 5.58E+00                          |
| UCFP051                  | Unk       | FP071       | FP071               | 9.72E+00                | G T         | Unk        | FP079        | FP079 <sub>F1</sub> | 5.83E+00                 | G T          | 7.99E+00                          |
| UCFP052                  | Unk       | Unk-pqd     | Unk-pqd             |                         |             | Unk        | Unk-pqd      | Unk-pqd             |                          |              |                                   |
| UCFP053                  | Unk       | Unk-MMI     | Unk-MMI             |                         | G           | Unk        | Unk-MMI      | Unk-MMI             |                          | G            |                                   |
| UCFP054                  | Unk       | Unk-MMI     | Unk-MMI             |                         | G           | Unk        | Unk-MMI      | Unk-MMI             |                          | G            |                                   |
| UCFP055                  | Unk       | Unk-PNI     | Unk-PNI             |                         | G           | Unk        | UCFP056      | Unk-PNI             |                          | G            |                                   |
| UCFP056                  | Unk       | Unk-PNI     | Unk-PNI             |                         | G           | Unk        | UCFP055      | Unk-PNI             |                          | G            |                                   |
| UCFP057                  | Unk       | Unk-PNI     | Unk-PNI             |                         | G           | Unk        | Unk-PNI      | Unk-PNI             |                          | G            |                                   |
| UCFP058                  | Unk       | Unk-MMI     | Unk-MMI             |                         | G           | Unk        | Unk-MMI      | Unk-MMI             |                          | G            |                                   |
| UCFP059                  | Unk       | FP066       | FP066 <sub>F1</sub> | 5.25E+00                | G           | Unk        | FP138        | FP138               | 1.55E+00                 | G            | 4.89E+00                          |
| UCFP060                  | Unk       | Unk-MMI     | Unk-MMI             |                         | G           | Unk        | Unk-MMI      | Unk-MMI             |                          | G            |                                   |
| UCFP061                  | Unk       | Unk-MMI     | Unk-MMI             |                         | G           | Unk        | Unk-MMI      | Unk-MMI             |                          | G            |                                   |
| UCFP062                  | Unk       | Unk-MMI     | Unk-MMI             |                         | G           | Unk        | Unk-MMI      | Unk-MMI             |                          | G            |                                   |
| UCFP063                  | Unk       | Unk-MMI     | Unk-MMI             |                         | G           | Unk        | Unk-MMI      | Unk-MMI             |                          | G            |                                   |
| UCFP064                  | Unk       | Unk-pqd     | Unk-pqd             |                         |             | Unk        | Unk-pqd      | Unk-pqd             |                          |              |                                   |
| UCFP065                  | Unk       | Unk-MMI     | Unk-MMI             |                         | G           | Unk        | Unk-MMI      | Unk-MMI             |                          | G            |                                   |
| UCFP066                  | Unk       | Unk-MMI     | Unk-MMI             |                         | G           | Unk        | Unk-MMI      | Unk-MMI             |                          | G            |                                   |
| UCFP067                  | FP113     | FP113       | FP113               | 5.43E+00                | F G         | Unk        | Unk-PNI      | Unk-PNI             |                          | G            |                                   |
| UCFP068                  | Unk       | Unk-MMI     | Unk-MMI             |                         | G           | Unk        | Unk-MMI      | Unk-MMI             |                          | G            |                                   |
| UCFP069                  | Unk       | Unk-MMI     | Unk-MMI             |                         | G           | Unk        | Unk-MMI      | Unk-MMI             |                          | G            |                                   |
| UCFP070                  | Unk       | Unk-MMI     | Unk-MMI             |                         | G           | Unk        | FP065        | FP065 <sub>F1</sub> | 1.11E+01                 | G            |                                   |
| UCFP071                  | Unk       | FP120       | FP120               | 9.37E+00                | G           | Unk        | Unk-PNI      | Unk-PNI             |                          | G            |                                   |
| UCFP072                  | Unk       | Unk-MMI     | Unk-MMI             |                         | G           | Unk        | Unk-MMI      | Unk-MMI             |                          | G            |                                   |
| UCFP073                  | Unk       | Unk-MMI     | Unk-MMI             |                         | G           | Unk        | K093         | FP181 / K093        | 9.77E+00                 | G            |                                   |
| UCFP074                  | Unk       | Unk-MMI     | Unk-MMI             |                         | G           | Unk        | Unk-MMI      | Unk-MMI             |                          | G            |                                   |
| UCFP075                  | Unk       | Unk-MMI     | Unk-MMI             |                         | G           | Unk        | FP065        | FP065 <sub>F1</sub> | 1.05E+01                 | G            |                                   |
| UCFP076                  | Unk       | Unk-PNI     | Unk-PNI             |                         | G           | Unk        | Unk-PNI      | Unk-PNI             |                          | G            |                                   |
| UCFP077                  | Unk       | Unk-PNI     | Unk-PNI             |                         | G           | Unk        | Unk-PNI      | Unk-PNI             |                          | G            |                                   |
| UCFP078                  | Unk       | Unk-PNI     | Unk-PNI             |                         | G           | Unk        | Unk-PNI      | Unk-PNI             |                          | G            |                                   |
| UCFP079                  | Unk       | Unk-PNI     | Unk-PNI             |                         | G           | Unk        | Unk-PNI      | Unk-PNI             |                          | G            |                                   |
| UCFP080                  | Unk       | FP095       | FP095 <sub>F1</sub> | 1.04E+01                | G           | Unk        | Unk-PNI      | Unk-PNI             |                          | G            |                                   |
| UCFP081                  | Unk       | Unk-MMI     | Unk-MMI             |                         | G           | Unk        | Unk-MMI      | Unk-MMI             |                          | G            |                                   |
| UCFP082                  | Unk       | Unk-sna     | Unk-sna             |                         |             | Unk        | Unk-sna      | Unk-sna             |                          |              |                                   |
| UCFP083                  | Unk       | Unk-PNI     | Unk-PNI             |                         | G           | Unk        | Unk-PNI      | Unk-PNI             |                          | G            |                                   |
| UCFP084                  | Unk       | Unk-MMI     | Unk-MMI             |                         | G           | Unk        | Unk-MMI      | Unk-MMI             |                          | G            |                                   |
| UCFP085                  | Unk       | Unk-MMI     | Unk-MMI             |                         | G           | Unk        | Unk-MMI      | Unk-MMI             |                          | G            |                                   |
| UCFP086                  | Unk       | Unk-pqd     | Unk-pqd             |                         |             | Unk        | Unk-pqd      | Unk-pqd             |                          |              |                                   |
| UCFP087                  | Unk       | Unk-MMI     | Unk-MMI             |                         | G           | Unk        | Unk-MMI      | Unk-MMI             |                          | G            |                                   |
| UCFP088                  | Unk       | Unk-MMI     | Unk-MMI             |                         | G           | Unk        | Unk-MMI      | Unk-MMI             |                          | G            |                                   |
| UCFP089                  | Unk       | Unk-MMI     | Unk-MMI             |                         | G           | Unk        | Unk-MMI      | Unk-MMI             |                          | G            |                                   |
| UCFP090                  | Unk       | Unk-MMI     | Unk-MMI             |                         | G           | Unk        | Unk-MMI      | Unk-MMI             |                          | G            |                                   |
| UCFP091                  | Unk       | Unk-MMI     | Unk-MMI             |                         | G           | Unk        | Unk-MMI      | Unk-MMI             |                          | G            |                                   |
| UCFP092                  | Unk       | Unk-MMI     | Unk-MMI             |                         | G           | Unk        | K093         | FP181 / K093        | 1.04E+01                 | G            |                                   |
| UCFP093                  | Unk       | Unk-MMI     | Unk-MMI             |                         | G           | Unk        | Unk-MMI      | Unk-MMI             |                          | G            |                                   |
| UCFP094                  | Unk       | Unk-MMI     | Unk-MMI             |                         | G           | Unk        | FP079        | FP079 <sub>F1</sub> | 4.89E+00                 | G            |                                   |
| UCFP095                  | Unk       | Unk-MMI     | Unk-MMI             |                         | G           | Unk        | Unk-MMI      | Unk-MMI             |                          | G            |                                   |
| UCFP096                  | Unk       | FP095       | FP095 <sub>F1</sub> | 7.85E+00                | G           | Unk        | Unk-MMI      | Unk-MMI             |                          | G            |                                   |
| UCFP097                  | Unk       | Unk-MMI     | Unk-MMI             |                         | G           | Unk        | Unk-MMI      | Unk-MMI             |                          | G            |                                   |
| UCFP098                  | Unk       | Unk-MMI     | Unk-MMI             |                         | G           | Unk        | Unk-MMI      | Unk-MMI             |                          | G            |                                   |

### DAM IDENTIFICATION

### SIRE IDENTIFICATION

| Field ID & Genetic group | Field Dam | Genetic Dam | Dam Consensus       | Dam-offspring LOD score | Dam support | Field Sire | Genetic Sire | Sire Consensus | Sire Offspring LOD score | Sire support | Dame Sire and offspring LOD score |
|--------------------------|-----------|-------------|---------------------|-------------------------|-------------|------------|--------------|----------------|--------------------------|--------------|-----------------------------------|
| UCFP099                  | Unk       | Unk-MMI     | Unk-MMI             |                         | G           | Unk        | Unk-MMI      | Unk-MMI        |                          | G            |                                   |
| UCFP100                  | Unk       | Unk-MMI     | Unk-MMI             |                         | G           | Unk        | Unk-MMI      | Unk-MMI        |                          | G            |                                   |
| UCFP101                  | Unk       | Unk-MMI     | Unk-MMI             |                         | G           | Unk        | Unk-MMI      | Unk-MMI        |                          | G            |                                   |
| UCFP102                  | Unk       | Unk-MMI     | Unk-MMI             |                         | G           | Unk        | Unk-MMI      | Unk-MMI        |                          | G            |                                   |
| UCFP103                  | Unk       | Unk-PNI     | Unk-PNI             |                         | G           | Unk        | Unk-PNI      | Unk-PNI        |                          | G            |                                   |
| UCFP104                  | Unk       | FP083       | FP083 <sub>F1</sub> | 8.13E+00                | G           | Unk        | K093         | FP181 / K093   | 1.13E+01                 | G            | 9.98E+00                          |
| UCFP105                  | Unk       | Unk-ND      | Unk-ND              |                         |             | Unk        | Unk-ND       | Unk-ND         |                          |              |                                   |
| UCFP106                  | Unk       | Unk-MMI     | Unk-MMI             |                         | G           | Unk        | Unk-MMI      | Unk-MMI        |                          | G            |                                   |
| UCFP107                  | Unk       | Unk-MMI     | Unk-MMI             |                         | G           | Unk        | Unk-MMI      | Unk-MMI        |                          | G            |                                   |
| UCFP108                  | Unk       | Unk-ND      | Unk-ND              |                         |             | Unk        | Unk-ND       | Unk-ND         |                          |              |                                   |
| UCFP109                  | Unk       | Unk-ND      | Unk-ND              |                         |             | Unk        | Unk-ND       | Unk-ND         |                          |              |                                   |
| UCFP110                  | Unk       | Unk-ND      | Unk-ND              |                         |             | Unk        | Unk-ND       | Unk-ND         |                          |              |                                   |
| UCFP111                  | Unk       | Unk-MMI     | Unk-MMI             |                         | G           | Unk        | Unk-MMI      | Unk-MMI        |                          | G            |                                   |
| UCFP112                  | Unk       | Unk-MMI     | Unk-MMI             |                         | G           | Unk        | Unk-MMI      | Unk-MMI        |                          | G            |                                   |
| UCFP113                  | Unk       | Unk-ND      | Unk-ND              |                         |             | Unk        | Unk-ND       | Unk-ND         |                          |              |                                   |
| UCFP114                  | Unk       | Unk-MMI     | Unk-MMI             |                         | G           | Unk        | Unk-MMI      | Unk-MMI        |                          | G            |                                   |
| UCFP115                  | Unk       | Unk-ND      | Unk-ND              |                         |             | Unk        | Unk-ND       | Unk-ND         |                          |              |                                   |
| UCFP116                  | Unk       | Unk-ND      | Unk-ND              |                         |             | Unk        | Unk-ND       | Unk-ND         |                          |              |                                   |
| UCFP117                  | Unk       | Unk-ND      | Unk-ND              |                         |             | Unk        | Unk-ND       | Unk-ND         |                          |              |                                   |
| UCFP118                  | Unk       | Unk-ND      | Unk-ND              |                         |             | Unk        | Unk-ND       | Unk-ND         |                          |              |                                   |
| UCFP119                  | Unk       | Unk-ND      | Unk-ND              |                         |             | Unk        | Unk-ND       | Unk-ND         |                          |              |                                   |
| UCFP120                  | Unk       | Unk-ND      | Unk-ND              |                         |             | Unk        | Unk-ND       | Unk-ND         |                          |              |                                   |
| UCFP121                  | Unk       | Unk-ND      | Unk-ND              |                         |             | Unk        | Unk-ND       | Unk-ND         |                          |              |                                   |
| UCFP122                  | Unk       | Unk-ND      | Unk-ND              |                         |             | Unk        | Unk-ND       | Unk-ND         |                          |              |                                   |
| UCFP123                  | Unk       | Unk-MMI     | Unk-MMI             |                         | G           | Unk        | FP137        | FP137          | 5.15E+00                 | G            |                                   |
| UCFP124                  | Unk       | Unk-ND      | Unk-ND              |                         |             | Unk        | Unk-ND       | Unk-ND         |                          |              |                                   |
| UCFP125                  | Unk       | Unk-ND      | Unk-ND              |                         |             | Unk        | Unk-ND       | Unk-ND         |                          |              |                                   |
| UCFP126                  | Unk       | Unk-ND      | Unk-ND              |                         |             | Unk        | Unk-ND       | Unk-ND         |                          |              |                                   |
| UCFP127                  | Unk       | Unk-ND      | Unk-ND              |                         |             | Unk        | Unk-ND       | Unk-ND         |                          |              |                                   |
| UCFP128                  | Unk       | Unk-ND      | Unk-ND              |                         |             | Unk        | Unk-ND       | Unk-ND         |                          |              |                                   |
| UCFP129                  | Unk       | Unk-ND      | Unk-ND              |                         |             | Unk        | Unk-ND       | Unk-ND         |                          |              |                                   |
| UCFP130                  | Unk       | Unk-ND      | Unk-ND              |                         |             | Unk        | Unk-ND       | Unk-ND         |                          |              |                                   |
| UCFP131                  | Unk       | Unk-ND      | Unk-ND              |                         |             | Unk        | Unk-ND       | Unk-ND         |                          |              |                                   |
| UCFP132                  | Unk       | Unk-ND      | Unk-ND              |                         |             | Unk        | Unk-ND       | Unk-ND         |                          |              |                                   |
| UCFP133                  | Unk       | Unk-ND      | Unk-ND              |                         |             | Unk        | Unk-ND       | Unk-ND         |                          |              |                                   |
| UCFP134                  | Unk       | Unk-ND      | Unk-ND              |                         |             | Unk        | Unk-ND       | Unk-ND         |                          |              |                                   |
| UCFP135                  | Unk       | Unk-ND      | Unk-ND              |                         |             | Unk        | Unk-ND       | Unk-ND         |                          |              |                                   |
| UCFP136                  | Unk       | Unk-ND      | Unk-ND              |                         |             | Unk        | Unk-ND       | Unk-ND         |                          |              |                                   |
| UCFP137                  | Unk       | Unk-ND      | Unk-ND              |                         |             | Unk        | Unk-ND       | Unk-ND         |                          |              |                                   |
| UCFP138                  | Unk       | Unk-ND      | Unk-ND              |                         |             | Unk        | Unk-ND       | Unk-ND         |                          |              |                                   |
| UCFP139                  | Unk       | Unk-ND      | Unk-ND              |                         |             | Unk        | Unk-ND       | Unk-ND         |                          |              |                                   |
| UCFP-LawEnfor            | Unk       | Unk-PNI     | Unk-PNI             |                         | G           | Unk        | Unk-PNI      | Unk-PNI        |                          | G            |                                   |
| K002                     | FP040     | FP040       | FP040               | 2.61E+00                | F G         | FP028      | FP028        | FP028          | 7.44E+00                 | F G          | 1.12E+01                          |
| K003                     | FP040     | Unk-sna     | FP040               |                         | F LMG TC    | FP026      | Unk-sna      | FP026          |                          | F TC         |                                   |
| K004                     | FP040     | Unk-sna     | FP040               |                         | F LMG TC    | FP026      | Unk-sna      | FP026          |                          | F TC         |                                   |
| K005                     | FP040     | Unk-sna     | FP040               |                         | F LMG TC    | FP026      | Unk-sna      | FP026          |                          | F TC         |                                   |
| K006                     | FP048     | FP048       | FP048               | 6.69E+00                | F G TC      | FP012      | FP012        | FP012          | 2.40E+00                 | F G TC       | 2.57E+00                          |
| K007                     | FP048     | Unk-sna     | FP048               |                         | F LMG TC    | FP012      | Unk-sna      | FP12           |                          | F LMG TC     |                                   |
| K008                     | FP048     | Unk-sna     | FP048               |                         | F LMG TC    | FP012      | Unk-sna      | FP12           |                          | F LMG TC     |                                   |
| K010                     | FP056     | Unk-sna     | FP056               |                         | F T         | Unk        | Unk-sna      | FP045          |                          | LMG T        |                                   |
| K011 or K009             | FP056     | Unk-sna     | FP056               |                         | F T         | Unk        | Unk-sna      | FP045          |                          | LMG T        |                                   |
| K013                     | FP019     | FP019       | FP019               | 5.32E+00                | F G TC      | Unk        | FP012        | FP012          | 7.19E+00                 | G TC         | 7.50E+00                          |
| K014                     | FP055     | Unk-sna     | FP055               |                         | F TC        | FP042      | Unk-sna      | FP042          |                          | F TC         |                                   |
| K015                     | FP055     | Unk-sna     | FP055               |                         | F TC        | FP042      | Unk-sna      | FP042          |                          | F TC         |                                   |
| K017                     | FP048     | FP048       | FP048               | 5.49E+00                | F G         | Unk        | FP68/K002    | FP068          | 1.30E+00                 | G T          | 3.44E+00                          |
| K020                     | FP056     | Unk-sna     | FP056               |                         | F TC        | FP045      | Unk-sna      | FP045          |                          | F TC         |                                   |
| K021                     | FP056     | Unk-sna     | FP056               |                         | F TC        | FP045      | Unk-sna      | FP045          |                          | F TC         |                                   |
| K022                     | FP056     | Unk-sna     | FP056               |                         | F TC        | FP045      | Unk-sna      | FP045          |                          | F TC         |                                   |

### DAM IDENTIFICATION

### SIRE IDENTIFICATION

| Field ID & Genetic group | Field Dam | Genetic Dam | Dam Consensus       | Dam-offspring LOD score | Dam support | Field Sire   | Genetic Sire | Sire Consensus      | Sire Offspring LOD score | Sire support | Dame Sire and offspring LOD score |
|--------------------------|-----------|-------------|---------------------|-------------------------|-------------|--------------|--------------|---------------------|--------------------------|--------------|-----------------------------------|
| K023F1                   | TX106     | Unk-sna     | TX106               |                         | F TC        | FP051        | Unk-sna      | FP051               |                          | F TC         |                                   |
| K024                     | FP036     | Unk-sna     | FP036               |                         | F           | FP045        | Unk-sna      | FP045               |                          | F T(C?)      |                                   |
| K025                     | FP036     | Unk-sna     | FP036               |                         | F           | FP045        | Unk-sna      | FP045               |                          | F T(C?)      |                                   |
| K026                     | FP036     | Unk-sna     | FP036               |                         | F           | FP045        | Unk-sna      | FP045               |                          | F T(C?)      |                                   |
| K027                     | FP019     | Unk-sna     | FP019               |                         | F TC        | FP054/051    | Unk-sna      | FP054               |                          | F TC         |                                   |
| K028                     | FP019     | Unk-sna     | FP019               |                         | F TC        | FP054/051    | Unk-sna      | FP054               |                          | F TC         |                                   |
| K029                     | FP056     | Unk-sna     | FP056               |                         | F TC        | FP045        | Unk-sna      | FP045               |                          | F TC         |                                   |
| K030                     | FP056     | Unk-sna     | FP056               |                         | F TC        | FP045        | Unk-sna      | FP045               |                          | F TC         |                                   |
| K034F1                   | TX105     | Unk-sna     | TX105               |                         | F TC        | FP016        | Unk-sna      | FP016               |                          | F LMG TC     |                                   |
| K037                     | FP040     | FP040       | FP040               | 2.62E+00                | F G T       | FP045        | FP045        | FP045               | 4.73E+00                 | F G T        | 6.64E+00                          |
| K040                     | FP056     | Unk-sna     | FP056               |                         | F TC        | FP045        | Unk-sna      | FP045               |                          | F LMG TC     |                                   |
| K041                     | FP056     | Unk-sna     | FP056               |                         | F TC        | FP045        | Unk-sna      | FP045               |                          | F LMG TC     |                                   |
| K043                     | FP056     | Unk-sna     | FP056               |                         | F TC        | FP045        | Unk-sna      | FP045               |                          | F LMG TC     |                                   |
| K044                     | FP055     | Unk-sna     | FP055               |                         | F           | Unk          | Unk-sna      | Unk-sna             |                          |              |                                   |
| K046F1                   | TX108     | Unk-sna     | TX108               |                         | F LMG TC    | FP016        | Unk-sna      | FP016               |                          | F LMG        |                                   |
| K047F1                   | TX106     | Unk-sna     | TX106               |                         | F TC        | FP054/059    | Unk-sna      | FP059               |                          | F TC         |                                   |
| K049                     | FP055     | FP055       | FP055               | 1.81E+01                | F G T       | Unk          | FP079        | FP079 <sub>F1</sub> | 2.04E+00                 | G T          | 6.95E+00                          |
| K050                     | FP055     | Unk-sna     | FP055               |                         | F T         | Unk          | Unk-sna      | FP079 <sub>F1</sub> |                          | LMG T        |                                   |
| K051                     | FP048     | Unk-sna     | FP048               |                         | F T         | FP068        | Unk-sna      | FP045               |                          | F T          |                                   |
| K052                     | FP066     | Unk-sna     | FP066 <sub>F1</sub> |                         | F TC        | FP072        | Unk-sna      | FP072               |                          | F TC         |                                   |
| K053                     | FP066     | Unk-sna     | FP066 <sub>F1</sub> |                         | F TC        | FP072        | Unk-sna      | FP072               |                          | F TC         |                                   |
| K054                     | FP066     | Unk-sna     | FP066 <sub>F1</sub> |                         | F TC        | FP072        | Unk-sna      | FP072               |                          | F TC         |                                   |
| K055                     | FP049     | Unk-sna     | FP049               |                         | F           | Unk          | Unk-sna      | Unk-sna             |                          |              |                                   |
| K056                     | TX107     | Unk-sna     | TX107               |                         | F LMG       | FP079?       | Unk-sna      | FP079 <sub>F1</sub> |                          | F LMG T      |                                   |
| K057                     | TX107     | Unk-sna     | TX107               |                         | F LMG       | FP079?       | Unk-sna      | FP079 <sub>F1</sub> |                          | F LMG T      |                                   |
| K061                     | FP055     | Unk-sna     | FP055               |                         | F T         | Unk (FP79??) | Unk-sna      | FP079 <sub>F1</sub> |                          | F LMG T      |                                   |
| K062F1                   | TX106     | TX106       | TX106               |                         | F G         | FP054/060    | FP060        | FP060               |                          | F G          |                                   |
| K069                     | FP071     | FP071       | FP071               | 1.29E+01                | F G TC      | FP079        | FP079        | FP079 <sub>F1</sub> | -1.45E+00                | F G TC       | 7.27E-01                          |
| K070                     | FP071     | FP071       | FP071               | 1.03E+01                | F G TC      | FP079        | FP079        | FP079 <sub>F1</sub> | 9.99E+00                 | F G TC       | 1.21E+01                          |
| K071                     | FP069     | FP069       | FP069               | 5.65E+00                | F G         | Unk          | FP111        | FP111               | 3.20E+00                 | G            | 4.67E+00                          |
| K072                     | FP069     | FP069       | FP069               | 3.27E+00                | F G         | Unk          | FP111        | FP111               | 4.82E+00                 | G            | 5.46E+00                          |
| K073                     | FP069     | FP069       | FP069               | 4.16E+00                | F G         | Unk          | FP111        | FP111               | 5.96E+00                 | G            | 7.63E+00                          |
| K074                     | FP048     | FP048       | FP048               | 4.94E+00                | F G         | FP068/63     | FP068        | FP068               | 9.64E+00                 | F G          | 1.39E+01                          |
| K075                     | FP048     | FP048       | FP048               | 3.14E+00                | F G T       | FP068/63     | FP068        | FP068               | 9.68E+00                 | F G T        | 1.27E+01                          |
| K076                     | FP066     | FP066       | FP066 <sub>F1</sub> | 6.64E+00                | F G TC      | FP060        | FP060        | FP060               | 5.53E+00                 | F G TC       | 8.48E+00                          |
| K077                     | FP066     | FP066       | FP066 <sub>F1</sub> | 2.28E+00                | F G TC      | FP060        | FP060        | FP060               | 2.25E+00                 | F G TC       | 4.51E+00                          |
| K078                     | FP066     | FP066       | FP066 <sub>F1</sub> | 8.19E+00                | F G TC      | FP060        | FP060        | FP060               | 4.25E+00                 | F G TC       | 6.59E+00                          |
| K081                     | FP077     | FP077       | FP077               | 6.10E+00                | F G T       | Unk          | FP100        | FP100               | 4.34E+00                 | G T          | 6.78E+00                          |
| K083                     | FP077     | FP077       | FP077               | 7.88E+00                | F G T       | Unk          | FP100        | FP100               | 3.16E+00                 | G T          | 6.24E+00                          |
| K084                     | FP067     | FP067       | FP067               | 6.01E+00                | F G         | Unk          | UCFP50       | UCFP50              | 5.20E+00                 | G            | 7.80E+00                          |
| K085                     | FP067     | FP067       | FP067               | 4.98E+00                | F G         | Unk          | UCFP50       | UCFP50              | 6.34E+00                 | G            | 7.57E+00                          |
| K087                     | FP082     | FP082       | FP082               | 3.49E+00                | F G TC      | FP065        | FP065        | FP065 <sub>F1</sub> | 7.18E+00                 | F G TC       | 1.33E+01                          |
| K088                     | FP082     | FP082       | FP082               | 2.46E+00                | F G TC      | FP065        | FP065        | FP065 <sub>F1</sub> | 7.71E+00                 | F G TC       | 1.33E+01                          |
| K091                     | FP087     | FP087       | FP087               | 1.39E+01                | F G         | FP079        | FP079        | FP079 <sub>F1</sub> | 1.72E+00                 | F G TC       | 5.46E+00                          |
| K092                     | TX106     | TX106       | TX106               | 1.27E+01                | F G         | FP060        | Unk-PNI      | Unk-PNI             |                          | G            |                                   |
| K094                     | FP088     | FP088       | FP088               | 1.31E+01                | F G         | Unk          | Unk-PNI      | Unk-PNI             |                          | G            |                                   |
| K095                     | FP088     | Unk-sna     | FP088               |                         | F LMG       | Unk          | Unk-sna      | Unk-sna             |                          |              |                                   |
| K096                     | FP088     | Unk-sna     | FP088               |                         | F LMG       | Unk          | Unk-sna      | Unk-sna             |                          |              |                                   |
| K097                     | FP088     | Unk-sna     | FP088               |                         | F LMG       | Unk          | Unk-sna      | Unk-sna             |                          |              |                                   |
| K099                     | FP067     | FP067       | FP067               | 6.93E+00                | F G         | Unk          | Unk-PNI      | Unk-PNI             |                          | G            |                                   |
| K100                     | FP067     | FP067       | FP067               | 3.60E+00                | F G         | Unk          | Unk-PNI      | Unk-PNI             |                          | G            |                                   |
| K101                     | FP067     | FP067       | FP067               | 3.65E+00                | F G         | Unk          | Unk-PNI      | Unk-PNI             |                          | G            |                                   |
| K102                     | FP075     | FP075       | FP075               | 6.17E+00                | F G TC      | FP059        | FP059        | FP059               | 6.06E+00                 | F G TC       | 6.26E+00                          |
| K103                     | FP075     | FP075       | FP075               | 6.23E+00                | F G TC      | FP059        | FP059        | FP059               | 2.83E+00                 | F G TC       | 2.37E+00                          |
| K104                     | FP055     | FP055       | FP055               | 7.33E+00                | F G         | Unk          | Unk-PNI      | Unk-PNI             |                          | G            |                                   |
| K105                     | FP102     | FP102       | FP102               | 1.01E+01                | F G TC      | FP079        | FP079        | FP079 <sub>F1</sub> | 7.83E+00                 | F G TC       | 9.26E+00                          |
| K106                     | FP102     | FP102       | FP102               | 1.47E+01                | F G TC      | FP079        | FP079        | FP079 <sub>F1</sub> | 9.44E+00                 | F G TC       | 7.52E+00                          |
| K107                     | FP049     | FP049       | FP049               | 5.10E+00                | F G         | Unk          | Unk-PNI      | Unk-PNI             |                          | G            |                                   |

Table S2

**DAM IDENTIFICATION**

**SIRE IDENTIFICATION**

| Field ID & Genetic group | Field Dam | Genetic Dam | Dam Consensus       | Dam-offspring LOD score | Dam support | Field Sire | Genetic Sire | Sire Consensus      | Sire Offspring LOD score | Sire support | Dame Sire and offspring LOD score |
|--------------------------|-----------|-------------|---------------------|-------------------------|-------------|------------|--------------|---------------------|--------------------------|--------------|-----------------------------------|
| K108                     | FP077     | FP077       | FP077               | 3.97E+00                | F G         | Unk        | Unk-PNI      | Unk-PNI             |                          | G            |                                   |
| K109                     | FP073     | FP073       | FP073 <sub>F1</sub> | -5.30E+00               | F G         | Unk        | Unk-PNI      | Unk-PNI             |                          | G            |                                   |
| K110                     | FP073     | FP073       | FP073 <sub>F1</sub> | 3.97E+00                | F G         | Unk        | Unk-PNI      | Unk-PNI             |                          | G            |                                   |
| K111                     | FP073     | FP073       | FP073 <sub>F1</sub> | 8.54E+00                | F G         | Unk        | Unk-PNI      | Unk-PNI             |                          | G            |                                   |
| K112                     | FP095     | FP095       | FP095 <sub>F1</sub> | 1.69E+01                | F G T       | FP085      | FP085        | FP085               | 2.55E+01                 | F G T        | 2.65E+01                          |
| K114                     | FP093     | FP093       | FP093               | 9.62E+00                | F G TC      | FP079      | FP079        | FP079 <sub>F1</sub> | 7.85E+00                 | F G TC       | 7.60E+00                          |
| K116                     | FP093     | FP093       | FP093               | 9.89E+00                | F G TC      | FP079      | FP079        | FP079 <sub>F1</sub> | 4.70E+00                 | F G TC       | 5.27E+00                          |
| K117                     | FP078     | FP078       | FP078               | 6.94E+00                | F G TC      | FP059      | FP059        | FP059               | 4.15E+00                 | F G TC       | 3.23E+00                          |
| K118                     | FP078     | FP078       | FP078               | 8.42E+00                | F G TC      | FP059      | FP059        | FP059               | 5.63E+00                 | F G TC       | 4.49E+00                          |
| K121                     | FP101     | FP101       | FP101               | 3.70E+00                | F G         | Unk        | Unk-PNI      | Unk-PNI             |                          | G            |                                   |
| K122                     | FP101     | FP101       | FP101               |                         | F LMG       | Unk        | Unk-PNI      | Unk-PNI             |                          | LMG          |                                   |
| K123                     | FP083     | FP083       | FP083 <sub>F1</sub> | 6.00E+00                | F G         | Unk        | Unk-PNI      | Unk-PNI             |                          | G            |                                   |
| K124                     | FP106     | FP106       | FP106               | 4.31E+00                | F G         | Unk        | UCFP50       | UCFP50              | 5.81E+00                 | G            | 6.23E+00                          |
| K125                     | FP106     | FP106       | FP106               | 4.77E+00                | F G         | Unk        | UCFP50       | UCFP50              | 4.76E+00                 | G            | 4.80E+00                          |
| K126                     | FP106     | FP106       | FP106               | 6.92E+00                | F G         | Unk        | UCFP50       | UCFP50              | 7.05E+00                 | G            | 8.62E+00                          |
| K127                     | FP055     | FP055       | FP055               | 1.38E+01                | F G TC      | FP079      | FP079        | FP079 <sub>F1</sub> | 5.39E+00                 | F G TC       | 9.17E+00                          |
| K128                     | FP075     | FP075       | FP075               | 5.17E+00                | F G TC      | FP098/100  | FP098        | FP098               | 8.91E+00                 | F G TC       | 1.17E+01                          |
| K130                     | FP112     | FP112       | FP112               | 4.25E+00                | F G TC      | FP098/100  | FP100        | FP100               | 6.26E+00                 | F G TC       | 7.58E+00                          |
| K131                     | FP112     | FP112       | FP112               | 5.83E+00                | F G TC      | FP098/100  | FP100        | FP100               | 4.82E+00                 | F G TC       | 6.68E+00                          |
| K133                     | FP067     | FP067       | FP067               | 4.11E+00                | F G TC      | Unk        | FP098        | FP098               | 7.64E+00                 | G TC         | 9.85E+00                          |
| K134                     | FP067     | FP067       | FP067               | 5.02E+00                | F G TC      | Unk        | FP098        | FP098               | 7.20E+00                 | G TC         | 9.54E+00                          |
| K135                     | FP107     | FP107       | FP107               | 8.21E+00                | F G TC      | Unk        | FP059        | FP059               | 3.73E+00                 | G TC         | 2.81E+00                          |
| K136                     | FP107     | FP107       | FP107               | 1.03E+01                | F G TC      | Unk        | FP059        | FP059               | 5.26E+00                 | G TC         | 4.69E+00                          |
| K137                     | FP102     | FP102       | FP102               | 1.34E+01                | F G TC      | FP079      | FP079        | FP079 <sub>F1</sub> | 6.86E+00                 | F G TC       | 8.64E+00                          |
| K138                     | FP102     | FP102       | FP102               | 1.13E+01                | F G TC      | FP079      | FP079        | FP079 <sub>F1</sub> | 2.66E+00                 | F G TC       | 4.08E+00                          |
| K139                     | FP061     | FP061       | FP061 <sub>F1</sub> | 1.85E+01                | F G         | Unk        | Unk-PNI      | Unk-PNI             |                          | G            |                                   |
| K140                     | FP061     | FP061       | FP061 <sub>F1</sub> | 1.18E+01                | F G         | Unk        | Unk-PNI      | Unk-PNI             |                          | G            |                                   |
| K141                     | FP061     | Unk-sna     | FP061 <sub>F1</sub> |                         | F LMG       | Unk        | Unk-sna      | Unk-PNI             |                          | LMG          |                                   |
| K142                     | FP061     | FP061       | FP061 <sub>F1</sub> | 1.63E+01                | F G         | Unk        | Unk-PNI      | Unk-PNI             |                          | G            |                                   |
| K143                     | FP087     | FP087       | FP087               | 6.27E+00                | F G TC      | FP079      | FP079        | FP079 <sub>F1</sub> | 6.32E+00                 | F G TC       | 7.17E+00                          |
| K144                     | FP087     | FP087       | FP087               | 1.05E+01                | F G TC      | FP079      | FP079        | FP079 <sub>F1</sub> | 9.41E+00                 | F G TC       | 1.32E+01                          |
| K145                     | FP087     | Unk-sna     | FP087               |                         | F LMG TC    | FP079      | Unk-sna      | FP079 <sub>F1</sub> |                          | F LMG TC     |                                   |
| K146                     | FP101     | FP101       | FP101               | 3.30E+00                | F G TC      | FP065/100  | FP065        | FP065 <sub>F1</sub> | 4.73E+00                 | F G TC       | 1.09E+01                          |
| K148                     | FP101     | FP101       | FP101               | 2.84E+00                | F G TC      | FP065/100  | FP065        | FP065 <sub>F1</sub> | 4.03E+00                 | F G TC       | 9.53E+00                          |
| K149                     | FP110     | FP110       | FP110               | 4.31E+00                | F G         | Unk        | Unk-PNI      | Unk-PNI             |                          | G            |                                   |
| K151                     | FP110     | FP110       | FP110               | 2.40E+00                | F G         | Unk        | Unk-PNI      | Unk-PNI             |                          | G            |                                   |
| K153                     | FP093     | FP093       | FP093               | 1.15E+01                | F G TC      | FP060      | FP060        | FP060               | -1.62E+00                | F G TC       | 5.11E+00                          |
| K154                     | FP093     | FP093       | FP093               | 9.20E+00                | F G TC      | FP060      | FP060        | FP060               | -4.14E-01                | F G TC       | 5.80E+00                          |
| K155                     | FP120     | FP120       | FP120               | 8.20E+00                | F G T       | Unk        | FP079        | FP079 <sub>F1</sub> | 8.34E+00                 | G T          | 5.22E+00                          |
| K156                     | FP120     | FP120       | FP120               | 9.93E+00                | F G T       | Unk        | FP079        | FP079 <sub>F1</sub> | 7.13E+00                 | G T          | 6.53E+00                          |
| K157                     | FP075     | FP075       | FP075               | 6.11E+00                | F G T       | Unk        | FP133        | FP133               | 3.34E+00                 | G T          | 4.34E+00                          |
| K158                     | FP075     | FP075       | FP075               | 4.11E+00                | F G T       | Unk        | FP133        | FP133               | 5.92E+00                 | G T          | 8.60E+00                          |
| K159                     | FP075     | FP075       | FP075               | 3.82E+00                | F G T       | Unk        | FP133        | FP133               | 6.53E+00                 | G T          | 8.59E+00                          |
| K160                     | FP116     | FP116       | FP116               | 3.64E+00                | F G T       | FP065      | FP065        | FP065 <sub>F1</sub> | 6.37E+00                 | F G T        | 1.12E+01                          |
| K161                     | FP116     | FP116       | FP116               | 2.99E+00                | F G T       | FP065      | FP065        | FP065 <sub>F1</sub> | 2.10E+00                 | F G T        | 2.42E+00                          |
| K162                     | FP116     | FP116       | FP116               | 3.59E+00                | F G T       | FP065      | FP065        | FP065 <sub>F1</sub> | 1.68E+00                 | F G T        | 3.94E+00                          |
| K163                     | FP107     | FP107       | FP107               | 7.09E+00                | F G         | Unk        | Unk-PNI      | Unk-PNI             |                          | G            |                                   |
| K164                     | FP107     | FP107       | FP107               | 7.21E+00                | F G         | Unk        | Unk-PNI      | Unk-PNI             |                          | G            |                                   |
| K165                     | FP107     | FP107       | FP107               | 6.68E+00                | F G         | Unk        | Unk-PNI      | Unk-PNI             |                          | G            |                                   |
| K166                     | FP107     | FP107       | FP107               | 5.14E+00                | F G         | Unk        | Unk-PNI      | Unk-PNI             |                          | G            |                                   |
| K167                     | FP070     | FP070       | FP070               | 9.83E+00                | F G         | Unk        | FP079        | FP079 <sub>F1</sub> | 8.60E+00                 | G T          | 6.90E+00                          |
| K168                     | FP070     | FP070       | FP070               | 1.23E+01                | F G         | Unk        | FP079        | FP079 <sub>F1</sub> | 9.27E+00                 | G T          | 9.40E+00                          |
| K170                     | FP102     | FP102       | FP102               | 1.30E+01                | F G T       | FP079      | FP079        | FP079 <sub>F1</sub> | 1.02E+01                 | F G T        | 9.96E+00                          |
| K171                     | FP102     | FP102       | FP102               | 1.44E+01                | F G T       | FP079      | FP079        | FP079 <sub>F1</sub> | 5.84E+00                 | F G T        | 4.00E+00                          |
| K172                     | FP102     | FP102       | FP102               | 1.58E+01                | F G T       | FP079      | FP079        | FP079 <sub>F1</sub> | 1.07E+01                 | F G T        | 1.18E+01                          |
| K173                     | FP121     | Unk-pqd     | FP121               |                         | F           | Unk        | Unk-pqd      | Unk-pqd             |                          |              |                                   |
| K174                     | FP124     | FP124       | FP124               | 6.38E+00                | F G         | Unk        | K123         | K123                | 1.59E+00                 | G            | 4.97E+00                          |
| K175                     | FP124     | FP124       | FP124               | -1.12E+00               | F G         | Unk        | Unk-PNI      | Unk-PNI             |                          | G            |                                   |

### DAM IDENTIFICATION

### SIRE IDENTIFICATION

| Field ID & Genetic group | Field Dam | Genetic Dam | Dam Consensus       | Dam-offspring LOD score | Dam support | Field Sire | Genetic Sire | Sire Consensus | Sire Offspring LOD score | Sire support | Dame Sire and offspring LOD score |
|--------------------------|-----------|-------------|---------------------|-------------------------|-------------|------------|--------------|----------------|--------------------------|--------------|-----------------------------------|
| K176                     | FP124     | FP124       | FP124               | 2.84E+00                | F G         | Unk        | Unk-pqd      | Unk-PNI        |                          | G            |                                   |
| K177                     | FP124     | FP124       | FP124               |                         | F G         | Unk        | Unk-pqd      | Unk-PNI        |                          | LMG          |                                   |
| K178                     | FP110     | FP110       | FP110               | 2.95E+00                | F G         | Unk        | K128         | K128           | 5.71E+00                 | G            | 6.94E+00                          |
| K179                     | FP110     | FP110       | FP110               | 6.90E+00                | F G         | Unk        | K128         | K128           | 4.64E+00                 | G            | 6.05E+00                          |
| K180                     | FP107     | FP107       | FP107               | 7.99E+00                | F G         | FP119/131  | Unk-MMI      | Unk-MMI        |                          | G            |                                   |
| K181                     | FP107     | FP107       | FP107               |                         | F LMG       | FP119/131  | Unk-MMI      | Unk-MMI        |                          | F LMG        |                                   |
| K182                     | FP129     | FP129       | FP129               | 3.52E+00                | F G         | Unk        | Unk-PNI      | Unk-PNI        |                          | G            |                                   |
| K183                     | FP129     | FP129       | FP129               | 5.29E+00                | F G         | Unk        | Unk-PNI      | Unk-PNI        |                          | G            |                                   |
| K185                     | FP113     | Unk-sna     | FP113               |                         | F           | FP131/133  | Unk-sna      | Unk-sna        |                          |              |                                   |
| K186                     | FP113     | Unk-sna     | FP113               |                         | F           | FP131/133  | Unk-sna      | Unk-sna        |                          |              |                                   |
| K187                     | FP116     | FP116       | FP116               | 5.76E+00                | F G         | Unk        | K071         | K071           | 5.64E+00                 | G            | 6.14E+00                          |
| K188                     | FP116     | FP116       | FP116               | 9.50E+00                | F G         | Unk        | K071         | K071           | 6.29E+00                 | G            | 6.17E+00                          |
| K189                     | FP116     | FP116       | FP116               | 6.90E+00                | F G         | Unk        | K071         | K071           | 6.16E+00                 | G            | 5.26E+00                          |
| K190                     | FP128     | FP128       | FP128               | 2.57E+00                | F G         | Unk        | FP081        | FP081          | 6.71E+00                 | G            | 1.01E+01                          |
| K191                     | FP128     | FP128       | FP128               | 1.77E+00                | F G         | Unk        | FP081        | FP081          | 6.21E+00                 | G            | 1.00E+01                          |
| K192                     | FP075     | FP075       | FP075               | 2.58E+00                | F G TC      | FP135      | FP135        | FP135          | 6.61E+00                 | F G TC       | 9.30E+00                          |
| K193                     | FP075     | Unk-sna     | FP075               |                         | F LMG TC    | FP135      | Unk-sna      | FP135          |                          | F LMG TC     |                                   |
| K194                     | FP075     | FP075       | FP075               | 3.21E+00                | F G TC      | FP135      | FP135        | FP135          | 2.84E+00                 | F G TC       | 4.83E+00                          |
| K195                     | FP075     | Unk-sna     | FP075               |                         | F LMG TC    | FP135      | Unk-sna      | FP135          |                          | F LMG TC     |                                   |
| K196                     | FP110     | FP110       | FP110               | 6.61E+00                | F G         | Unk        | Unk-PNI      | Unk-PNI        |                          | G            |                                   |
| K197                     | FP110     | FP110       | FP110               | 2.13E+00                | F G         | Unk        | Unk-PNI      | Unk-PNI        |                          | G            |                                   |
| K198                     | FP110     | FP110       | FP110               | 2.32E+00                | F G         | Unk        | Unk-PNI      | Unk-PNI        |                          | G            |                                   |
| K199                     | FP110     | FP110       | FP110               | 4.19E+00                | F G         | Unk        | Unk-PNI      | Unk-PNI        |                          | G            |                                   |
| K200                     | FP107     | FP107       | FP107               | 4.75E+00                | F G         | FP131      | Unk-PNI      | Unk-PNI        |                          | G            |                                   |
| K201                     | FP107     | FP107       | FP107               | 8.20E+00                | F G         | FP131      | Unk-PNI      | Unk-PNI        |                          | G            |                                   |
| K202                     | FP121     | FP121       | FP121               | 2.80E+00                | F G         | Unk        | Unk-pqd      | Unk-PNI        |                          | G            |                                   |
| K203                     | FP121     | Unk-sna     | FP121               |                         | F           | Unk        | Unk-sna      | Unk-sna        |                          |              |                                   |
| K204                     | FP121     | FP121       | FP121               | 3.54E+00                | F G         | Unk        | Unk-pqd      | Unk-PNI        |                          | G            |                                   |
| K205                     | FP094     | FP094       | FP094 <sub>F1</sub> | 1.19E+01                | F G         | Unk        | FP125        | FP125          | 6.40E+00                 | G            | 9.22E+00                          |
| K206                     | FP094     | FP094       | FP094 <sub>F1</sub> | 1.61E+01                | F G         | Unk        | FP125        | FP125          | 4.01E+00                 | G            | 5.98E+00                          |
| K207                     | FP094     | FP094       | FP094 <sub>F1</sub> | 1.07E+01                | F G         | Unk        | FP125        | FP125          | 2.22E+00                 | G            | 4.95E+00                          |
| K208                     | FP145     | FP145       | FP145               |                         | F G         | FP138      | FP133        | FP133          |                          | G T          |                                   |
| K209                     | FP145     | FP145       | FP145               |                         | F G         | FP138      | FP133        | FP133          |                          | G T          |                                   |
| K210                     | FP145     | FP145       | FP145               | 8.87E+00                | F G         | FP138      | FP133        | FP133          | 3.86E+00                 | G T          | 1.07E+01                          |
| K211                     | FP093     | Unk-sna     | FP093               |                         | F TC        | FP133      | Unk-sna      | FP138          |                          | LMG TC       |                                   |
| K212                     | FP093     | FP093       | FP093               | 8.50E+00                | F G TC      | FP133      | FP138        | FP138          | 5.18E+00                 | G TC         | 1.12E+01                          |
| K213                     | FP093     | FP093       | FP093               | 8.91E+00                | F G TC      | FP133      | FP138        | FP138          | 3.25E+00                 | G TC         | 8.40E+00                          |
| K214                     | FP095     | FP095       | FP095 <sub>F1</sub> | 2.38E+01                | F G         | Unk        | FP125        | FP125          | 6.39E+00                 | G T          | 1.37E+01                          |
| K215                     | FP095     | Unk-sna     | FP095 <sub>F1</sub> |                         | F           | Unk        | Unk-sna      | FP125          |                          | LMG T        |                                   |
| K216                     | FP095     | FP095       | FP095 <sub>F1</sub> | 6.97E+00                | F G         | Unk        | FP125        | FP125          | 7.57E-01                 | G T          | 5.64E+00                          |
| K217                     | FP102     | FP102       | FP102               | 1.53E+01                | F G         | FP138      | FP138        | FP138          | 3.32E+00                 | F G          | 9.44E+00                          |
| K218                     | FP102     | FP102       | FP102               | 1.59E+01                | F G         | FP138      | FP138        | FP138          | 9.88E-01                 | F G          | 6.78E+00                          |
| K219                     | FP140     | FP140       | FP140               | 4.90E+00                | F G         | FP119      | FP131        | FP131          | 5.56E+00                 | G            | 1.08E+01                          |
| K220                     | FP140     | FP140       | FP140               | 1.13E+00                | F G         | FP119      | FP131        | FP131          | 7.49E+00                 | G            | 1.17E+01                          |
| K221                     | FP148     | FP148       | FP148               | 5.81E+00                | F G         | FP146?     | Unk-PNI      | Unk-PNI        |                          | G            |                                   |
| K222                     | FP148     | FP148       | FP148               | 1.41E+01                | F G         | FP146?     | Unk-PNI      | Unk-PNI        |                          | G            |                                   |
| K223                     | FP148     | FP148       | FP148               | 8.70E+00                | F G         | FP146?     | Unk-PNI      | Unk-PNI        |                          | G            |                                   |
| K224                     | FP124     | Unk-sna     | FP124               |                         | F           | Unk        | Unk-sna      | Unk-sna        |                          |              |                                   |
| K225                     | FP124     | Unk-sna     | FP124               |                         | F           | Unk        | Unk-sna      | Unk-sna        |                          |              |                                   |
| K226                     | FP093     | FP093       | FP093               | 8.69E+00                | F G T       | Unk        | FP133        | FP133          | 3.72E+00                 | G T          | 7.66E+00                          |
| K228                     | FP093     | FP093       | FP093               | 1.04E+01                | F G T       | Unk        | FP133        | FP133          | 4.36E+00                 | G T          | 4.48E+00                          |
| K229                     | FP110     | FP110       | FP110               | 8.47E-01                | F G         | FP137      | Unk-PNI      | Unk-PNI        |                          | G            |                                   |
| K230                     | FP110     | FP110       | FP110               | 4.53E+00                | F G         | FP137      | Unk-PNI      | Unk-PNI        |                          | G            |                                   |
| K231                     | FP110     | Unk-sna     | FP110               |                         | F LMG       | FP137      | Unk-sna      | Unk-PNI        |                          | LMG          |                                   |
| K232                     | FP110     | Unk-sna     | FP110               |                         | F LMG       | FP137      | Unk-sna      | Unk-PNI        |                          | LMG          |                                   |
| K233                     | FP113     | FP113       | FP113               | 2.66E+00                | F G         | FP119      | FP154        | FP154          | 8.56E+00                 | G            | 1.35E+01                          |
| K234                     | FP113     | FP113       | FP113               | 3.89E+00                | F G         | FP119      | FP154        | FP154          | 5.74E+00                 | G            | 9.68E+00                          |
| K236                     | FP103     | FP103       | FP103               | 1.30E+01                | F G TC      | FP127      | FP127        | FP127          | 3.05E+00                 | F G TC       | 4.45E+00                          |

### DAM IDENTIFICATION

### SIRE IDENTIFICATION

| Field ID & Genetic group | Field Dam | Genetic Dam | Dam Consensus | Dam-offspring LOD score | Dam support | Field Sire | Genetic Sire | Sire Consensus | Sire Offspring LOD score | Sire support | Dame Sire and offspring LOD score |
|--------------------------|-----------|-------------|---------------|-------------------------|-------------|------------|--------------|----------------|--------------------------|--------------|-----------------------------------|
| K237                     | FP103     | FP103       | FP103         | -6.06E-01               | F G TC      | FP127      | FP127        | FP127          | 2.88E+00                 | F G TC       | 3.91E+00                          |
| K238                     | FP103     | FP103       | FP103         | 1.10E+01                | F G TC      | FP127      | FP127        | FP127          | 8.30E+00                 | F G TC       | 1.06E+01                          |
| K239                     | FP149     | FP149       | FP149         | 9.65E+00                | F G         | Unk        | K093         | FP181 / K093   | 1.07E+01                 | G            | 1.28E+01                          |
| K240                     | FP149     | FP149       | FP149         | 1.13E+01                | F G         | Unk        | K093         | FP181 / K093   | 9.86E+00                 | G            | 8.81E+00                          |
| K241                     | FP151     | FP151       | FP151         | 1.37E+01                | F G         | Unk        | FP133        | FP133          | 6.68E+00                 | G            | 1.10E+01                          |
| K242                     | FP151     | FP151       | FP151         | 1.23E+01                | F G         | Unk        | FP133        | FP133          | 5.47E+00                 | G            | 7.85E+00                          |
| K243                     | FP151     | FP151       | FP151         | 1.40E+01                | F G         | Unk        | FP133        | FP133          | 4.21E+00                 | G            | 7.48E+00                          |
| K244                     | FP145     | FP145       | FP145         | 4.59E+00                | F G         | FP133      | FP133        | FP133          | 3.12E+00                 | G            | 7.05E+00                          |
| K245                     | FP145     | FP145       | FP145         | 7.28E+00                | F G         | FP133      | FP133        | FP133          | 1.15E+00                 | G            | 5.41E+00                          |
| K246                     | FP145     | FP145       | FP145         | 8.32E+00                | F G         | FP133      | FP133        | FP133          | 3.49E+00                 | G            | 7.80E+00                          |
| K247                     | FP107     | FP107       | FP107         | 8.12E+00                | F G         | Unk        | Unk-PNI      | Unk-PNI        |                          | G            |                                   |
| K248                     | FP107     | FP107       | FP107         | 7.08E+00                | F G         | Unk        | Unk-PNI      | Unk-PNI        |                          | G            |                                   |
| K249                     | FP107     | FP107       | FP107         | 7.88E+00                | F G         | Unk        | Unk-PNI      | Unk-PNI        |                          | G            |                                   |
| K250                     | FP128     | FP128       | FP128         | 6.06E+00                | F G         | Unk        | FP141        | FP141          | 6.31E+00                 | G            | 8.00E+00                          |
| K251                     | FP128     | FP128       | FP128         | 7.30E+00                | F G         | Unk        | FP141        | FP141          | 2.29E+00                 | G            | 4.39E+00                          |
| K252                     | FP128     | FP128       | FP128         | 8.08E+00                | F G         | Unk        | FP141        | FP141          | 4.19E+00                 | G            | 6.37E+00                          |
| K253                     | FP150     | FP150       | FP150         | 6.37E+00                | F G         | TBD        | FP138        | FP138          | 4.69E+00                 | G            | 6.90E+00                          |
| K255                     | FP150     | FP150       | FP150         | 6.54E+00                | F G         | TBD        | FP138        | FP138          | 1.33E+00                 | G            | 3.76E+00                          |
| K256                     | FP150     | FP150       | FP150         | 7.38E+00                | F G         | TBD        | FP138        | FP138          | 3.17E+00                 | G            | 7.12E+00                          |
| K257                     | FP110     | FP110       | FP110         | 3.97E+00                | F G         | Unk        | Unk-PNI      | Unk-PNI        |                          | G            |                                   |
| K258                     | FP110     | FP110       | FP110         | 8.19E-01                | F G         | Unk        | Unk-PNI      | Unk-PNI        |                          | G            |                                   |
| K259                     | FP151     | FP151       | FP151         | 7.56E+00                | F G         | TBD        | Unk-PNI      | Unk-PNI        |                          | G            |                                   |
| K260                     | FP151     | FP151       | FP151         |                         | F LMG       | TBD        | Unk-PNI      | Unk-PNI        |                          | LMG          |                                   |
| K261                     | FP107     | FP107       | FP107         | 5.25E+00                | F G         | Unk        | Unk-PNI      | Unk-PNI        |                          | G            |                                   |
| K262                     | FP107     | FP107       | FP107         | 1.04E+00                | F G         | Unk        | Unk-PNI      | Unk-PNI        |                          | G            |                                   |
| K263                     | FP107     | FP107       | FP107         | 3.75E+00                | F G         | Unk        | Unk-PNI      | Unk-PNI        |                          | G            |                                   |
| K265                     | FP151     | FP151       | FP151         | 7.85E+00                | F G         | Unk        | FP138        | FP138          | 1.19E+00                 | G            | 5.17E+00                          |
| K266                     | FP140     | FP140       | FP140         | 4.39E+00                | F G         | FP154      | FP154        | FP154          | 2.15E+00                 | G            | 5.23E+00                          |
| K267                     | FP140     | FP140       | FP140         | 3.64E+00                | F G         | FP154      | FP154        | FP154          | 1.33E+00                 | G            | 3.76E+00                          |
| K268                     | FP162     | nk-pqd Dam  | FP162         |                         | F LMG       | FP138      | Unk-PNI      | Unk-PNI        |                          | LMG          |                                   |
| K269                     | FP162     | nk-pqd Dam  | FP162         |                         | F G         | FP138      | Unk-PNI      | Unk-PNI        |                          | G            |                                   |
| K270                     | FP158     | FP158       | FP158         | 1.15E+01                | F G         | FP146      | FP146        | FP146          | 8.32E+00                 | G            | 8.31E+00                          |
| K271                     | FP158     | FP158       | FP158         |                         | F           | FP146      | FP146        | FP146          |                          | LMG          |                                   |
| K272                     | FP158     | FP158       | FP158         | 1.13E+01                | F G         | FP146      | FP146        | FP146          | 1.11E+01                 | G            | 1.11E+01                          |
| K273                     | FP158     | FP158       | FP158         | 1.05E+01                | F G         | FP146      | FP146        | FP146          | 1.02E+01                 | G            | 9.41E+00                          |
| K274                     | FP153     | FP153       | FP153         | 5.03E+00                | F G         | TBD        | FP138        | FP138          | 4.56E+00                 | G            | 9.15E+00                          |
| K275                     | FP153     | FP153       | FP153         | 7.75E+00                | F G         | TBD        | FP138        | FP138          |                          | G            |                                   |
| K276                     | FP153     | FP153       | FP153         | 5.10E+00                | F G         | TBD        | FP138        | FP138          | 1.66E+00                 | G            | 8.31E+00                          |
| K277                     | FP161     | Unk-ND      | FP161         |                         | F           | Unk        | Unk-ND       | Unk-ND         |                          |              |                                   |
| K278                     | FP161     | Unk-ND      | FP161         |                         | F           | Unk        | Unk-ND       | Unk-ND         |                          |              |                                   |
| K280                     | FP162     | Unk-ND      | FP162         |                         | F           | Unk        | Unk-ND       | Unk-ND         |                          |              |                                   |
| K281                     | FP153     | Unk-ND      | FP153         |                         | F           | Unk        | Unk-ND       | Unk-ND         |                          |              |                                   |
| K282                     | FP153     | Unk-ND      | FP153         |                         | F           | Unk        | Unk-ND       | Unk-ND         |                          |              |                                   |
| K283                     | FP168     | Unk-ND      | FP168         |                         | F           | Unk        | Unk-ND       | Unk-ND         |                          |              |                                   |
| K284                     | FP168     | Unk-ND      | FP168         |                         | F           | Unk        | Unk-ND       | Unk-ND         |                          |              |                                   |
| K285                     | FP171     | Unk-ND      | FP171         |                         | F           | Unk        | Unk-ND       | Unk-ND         |                          |              |                                   |
| K286                     | FP171     | Unk-ND      | FP171         |                         | F           | Unk        | Unk-ND       | Unk-ND         |                          |              |                                   |
| K287                     | FP171     | Unk-ND      | FP171         |                         | F           | Unk        | Unk-ND       | Unk-ND         |                          |              |                                   |
| K288                     | FP172     | Unk-ND      | FP172         |                         | F           | Unk        | Unk-ND       | Unk-ND         |                          |              |                                   |
| K289                     | FP172     | Unk-ND      | FP172         |                         | F           | Unk        | Unk-ND       | Unk-ND         |                          |              |                                   |
| K290                     | FP172     | Unk-ND      | FP172         |                         | F           | Unk        | Unk-ND       | Unk-ND         |                          |              |                                   |
| K291                     | FP145     | Unk-ND      | FP145         |                         | F           | Unk        | Unk-ND       | Unk-ND         |                          |              |                                   |
| K292                     | FP145     | Unk-ND      | FP145         |                         | F           | Unk        | Unk-ND       | Unk-ND         |                          |              |                                   |
| K293                     | FP145     | Unk-ND      | FP145         |                         | F           | Unk        | Unk-ND       | Unk-ND         |                          |              |                                   |
| K294                     | FP162     | Unk-ND      | FP162         |                         | F           | FP133      | Unk-ND       | Unk-ND         |                          |              |                                   |
| K295                     | FP162     | Unk-ND      | FP162         |                         | F           | FP133      | Unk-ND       | Unk-ND         |                          |              |                                   |
| K296                     | FP162     | Unk-ND      | FP162         |                         | F           | FP133      | Unk-ND       | Unk-ND         |                          |              |                                   |
| K297                     | FP148     | Unk-ND      | FP148         |                         | F           | Unk        | Unk-ND       | Unk-ND         |                          |              |                                   |

**DAM IDENTIFICATION**

**SIRE IDENTIFICATION**

| Field ID & Genetic group | Field Dam | Genetic Dam | Dam Consensus        | Dam-offspring LOD score | Dam support | Field Sire | Genetic Sire | Sire Consensus | Sire Offspring LOD score | Sire support | Dame Sire and offspring LOD score |
|--------------------------|-----------|-------------|----------------------|-------------------------|-------------|------------|--------------|----------------|--------------------------|--------------|-----------------------------------|
| K298                     | FP148     | Unk-ND      | FP148                |                         | F           | Unk        | Unk-ND       | Unk-ND         |                          |              |                                   |
| K299                     | FP148     | Unk-ND      | FP148                |                         | F           | Unk        | Unk-ND       | Unk-ND         |                          |              |                                   |
| unmar Ked2               | FP095     | Unk-sna     | FP095 <sub>F-1</sub> |                         | F T         | Unk        | Unk-sna      | FP085          |                          | LMG T        |                                   |
| FP080 fetus #1           | FP080     | FP080       | FP080                | 8.71E+00                | F G T       | FP081      | FP081        | FP081          | 6.19E+00                 | F G T        | 4.10E+00                          |
| FP080 fetus #2           | FP080     | FP080       | FP080                | 7.60E+00                | F G T       | FP081      | FP081        | FP081          | 6.46E+00                 | F G T        | 4.48E+00                          |
| FP080 fetus #3           | FP080     | FP080       | FP080                | 7.94E+00                | F G T       | FP081      | FP081        | FP081          | 7.14E+00                 | F G T        | 4.41E+00                          |
| FP116 fetus #1           | FP116     | FP116       | FP116                |                         | F G         | TBD        | Unk-MMI      | Unk-MMI        |                          | G            |                                   |
| FP116 fetus #2           | FP116     | FP116       | FP116                |                         | F G         | TBD        | Unk-MMI      | Unk-MMI        |                          | G            |                                   |
| <b>TEXAS FE</b>          |           |             |                      |                         |             |            |              |                |                          |              |                                   |
| TX101-BCNP BI            | Unk       | Unk-PNI     | UnK-Texas            |                         | G           | Unk        | Unk          | UnK-Texas      |                          | G            |                                   |
| Tx103 fetus #1           | TX103     | TX103       | TX103                |                         | F G         | Unk        | Unk-pqd      | Unk-pqd        |                          |              |                                   |
| TX102-BCNP BI            | Unk       | Unk-PNI     | UnK-Texas            |                         | G           | Unk        | Unk          | UnK-Texas      |                          | G            |                                   |
| TX103-LP                 | Unk       | Unk-PNI     | UnK-Texas            |                         | G           | Unk        | Unk          | UnK-Texas      |                          | G            |                                   |
| TX104-FSSP               | Unk       | Unk-PNI     | UnK-Texas            |                         | G           | Unk        | Unk          | UnK-Texas      |                          | G            |                                   |
| TX105-ENP                | Unk       | Unk-PNI     | UnK-Texas            |                         | G           | Unk        | Unk          | UnK-Texas      |                          | G            |                                   |
| TX106-FSSP               | Unk       | Unk-PNI     | UnK-Texas            |                         | G           | Unk        | Unk          | UnK-Texas      |                          | G            |                                   |
| TX107-RP                 | Unk       | Unk-PNI     | UnK-Texas            |                         | G           | Unk        | Unk          | UnK-Texas      |                          | G            |                                   |
| TX108-ENP                | Unk       | Unk-PNI     | UnK-Texas            |                         | G           | Unk        | Unk          | UnK-Texas      |                          | G            |                                   |



**DAM IDENTIFICATION**

**SIRE IDENTIFICATION**

| Field ID & Genetic group | Field Dam | Genetic Dam | Dam Consensus | Dam-offspring LOD score | Dam support | Field Sire | Genetic Sire | Sire Consensus | Sire Offspring LOD score | Sire support | Dame Sire and offspring LOD score |
|--------------------------|-----------|-------------|---------------|-------------------------|-------------|------------|--------------|----------------|--------------------------|--------------|-----------------------------------|
| <b>SEMINOL</b>           |           |             |               |                         |             |            |              |                |                          |              |                                   |
| WC00 "Little Boy"        | WC-07     | WC-07       | WC-07         | 2.58E+01                | G           | WC-08      | WC-08        | WC-08          | 1.79E+01                 | F G          | 1.74E+01                          |
| WC01 "castrated 10m"     | WC-07     | Unk-PNI     | Unk-PNI       |                         | G           | WC-08      | WC-08        | WC-08          | 2.27E+01                 | F G          |                                   |
| WC02 "Opal daughter"     | WC-07     | WC-07       | WC-07         | 2.20E+01                | F G         | Unk        | NA           | WC-08          | 2.13E+01                 | F G          | 2.10E+01                          |
| WC03                     | WC-07     | WC-07       | WC-07         | 1.24E+01                | F G         | WC-08      | WC-08        | WC-08          | 2.30E+01                 | F G          | 2.42E+01                          |
| WC04 "neutered"          | WC-07     | WC-07       | WC-07         | 1.77E+01                | F G         | WC-08      | WC-08        | WC-08          | 2.09E+01                 | F G          | 1.82E+01                          |
| WC05 "Taz"               | WC-07     | WC-07       | WC-07         | 1.64E+01                | F G         | WC-08      | WC-08        | WC-08          | 2.16E+01                 | F G          | 1.84E+01                          |
| WC06 "castrated 10"      | WC-07     | Unk-PNI     | Unk-PNI       |                         | G           | WC-08      | WC-08        | WC-08          | 2.87E+01                 | G            |                                   |
| WC07 "Opal"              | Unk       | Unk-PNI     | Unk-PNI       |                         | G           | Unk        | Unk-PNI      | Unk-PNI        |                          | G            |                                   |
| WC08 "Bubba"             | Unk       | Unk-PNI     | Unk-PNI       |                         | G           | Unk        | Unk-PNI      | Unk-PNI        |                          | G            |                                   |
| <b>PIPER - E</b>         |           |             |               |                         |             |            |              |                |                          |              |                                   |
| Piper "Cmp Kala"         |           |             |               |                         |             |            |              |                |                          |              |                                   |
| Piper "Offspring"        |           |             |               |                         |             |            |              |                |                          |              |                                   |
| Piper "Ocho"             |           |             |               |                         |             |            |              |                |                          |              |                                   |
| Piper "Bert Wah"         |           |             |               |                         |             |            |              |                |                          |              |                                   |
| Piper "Dies Dos"         |           |             |               |                         |             |            |              |                |                          |              |                                   |
| Piper "Kima"             |           |             |               |                         |             |            |              |                |                          |              |                                   |
| Piper "Survivor"         |           |             |               |                         |             |            |              |                |                          |              |                                   |
| Piper "Florida"          |           |             |               |                         |             |            |              |                |                          |              |                                   |
| Piper "Osceola"          |           |             |               |                         |             |            |              |                |                          |              |                                   |
| Piper "Hayeta"           |           |             |               |                         |             |            |              |                |                          |              |                                   |
| Piper "Synda"            |           |             |               |                         |             |            |              |                |                          |              |                                   |
| Piper "Delilah / f"      |           |             |               |                         |             |            |              |                |                          |              |                                   |
| Piper "Baca"             |           |             |               |                         |             |            |              |                |                          |              |                                   |
| Piper "Numa"             |           |             |               |                         |             |            |              |                |                          |              |                                   |

**GENETIC DIVERSITY**

**STRUCTURE ANALYSIS (K=9)**

| Field ID & Genetic group | Avg Het | Avg # Alleles | Heritage Calls | CFP   | CFP   | CFP   | EVG +AdmFP | CFP-BC +AdmFP | CFP-BC +AdmFP | AdmFP | AdmFP +SEM | TX-BC |
|--------------------------|---------|---------------|----------------|-------|-------|-------|------------|---------------|---------------|-------|------------|-------|
|                          |         |               |                | 1     | 2     | 3     | 4          | 5             | 6             | 7     | 8          | 9     |
| <b>FLORIDA</b>           |         |               |                |       |       |       |            |               |               |       |            |       |
| FP001                    | 0.167   | 1.33          | CFP            | 0.071 | 0.056 | 0.818 | 0.00       | 0.033         | 0.005         | 0.007 | 0.004      | 0.005 |
| FP002                    |         |               | CFP            |       |       |       |            |               |               |       |            |       |
| FP003                    | 0.184   | 1.37          | CFP            | 0.035 | 0.011 | 0.893 | 0.01       | 0.007         | 0.018         | 0.005 | 0.004      | 0.015 |
| FP004                    | 0.222   | 1.44          | CFP            | 0.013 | 0.057 | 0.863 | 0.02       | 0.012         | 0.008         | 0.011 | 0.002      | 0.011 |
| FP005                    |         |               | CFP            |       |       |       |            |               |               |       |            |       |
| FP006                    |         |               | CFP            |       |       |       |            |               |               |       |            |       |
| FP007                    | 0.167   | 1.33          | CFP            | 0.476 | 0.034 | 0.455 | 0.00       | 0.015         | 0.007         | 0.004 | 0.002      | 0.004 |
| FP008                    | 0.095   | 1.19          | CFP            | 0.01  | 0.769 | 0.174 | 0.00       | 0.01          | 0.005         | 0.004 | 0.002      | 0.023 |
| FP009                    | 0.119   | 1.24          | CFP            | 0.009 | 0.013 | 0.951 | 0.01       | 0.008         | 0.006         | 0.003 | 0.002      | 0.004 |
| FP010                    | 0.136   | 1.27          | CFP            | 0.019 | 0.038 | 0.905 | 0.00       | 0.017         | 0.008         | 0.003 | 0.002      | 0.005 |
| FP011                    | 0.167   | 1.33          | CFP            | 0.239 | 0.022 | 0.654 | 0.01       | 0.011         | 0.038         | 0.005 | 0.004      | 0.018 |
| FP012                    | 0.227   | 1.46          | CFP            | 0.884 | 0.023 | 0.047 | 0.00       | 0.018         | 0.011         | 0.003 | 0.008      | 0.004 |
| FP013                    | 0.176   | 1.35          | CFP            | 0.571 | 0.013 | 0.364 | 0.02       | 0.017         | 0.007         | 0.003 | 0.003      | 0.004 |
| FP014                    | 0.467   | 1.93          | EVG            | 0.023 | 0.011 | 0.014 | 0.84       | 0.035         | 0.02          | 0.024 | 0.029      | 0.008 |
| FP015                    | 0.361   | 1.72          | EVG            | 0.007 | 0.057 | 0.058 | 0.82       | 0.009         | 0.014         | 0.024 | 0.005      | 0.005 |
| FP016                    | 0.283   | 1.57          | EVG            | 0.009 | 0.008 | 0.019 | 0.94       | 0.008         | 0.009         | 0.003 | 0.003      | 0.003 |
| FP017                    | 0.214   | 1.43          | CFP            | 0.011 | 0.258 | 0.681 | 0.02       | 0.01          | 0.008         | 0.003 | 0.002      | 0.003 |
| FP018                    | 0.136   | 1.27          | CFP            | 0.02  | 0.008 | 0.948 | 0.00       | 0.007         | 0.005         | 0.003 | 0.003      | 0.003 |
| FP019                    | 0.159   | 1.32          | CFP            | 0.898 | 0.034 | 0.039 | 0.00       | 0.009         | 0.006         | 0.005 | 0.002      | 0.004 |
| FP020                    | 0.238   | 1.48          | CFP            | 0.016 | 0.029 | 0.921 | 0.01       | 0.008         | 0.006         | 0.006 | 0.002      | 0.004 |
| FP021                    | 0.324   | 1.65          | EVG            | 0.019 | 0.011 | 0.027 | 0.90       | 0.017         | 0.012         | 0.005 | 0.004      | 0.009 |
| FP022                    | 0.174   | 1.35          | EVG            | 0.021 | 0.02  | 0.045 | 0.82       | 0.037         | 0.015         | 0.026 | 0.005      | 0.013 |
| FP023                    | 0.167   | 1.33          | EVG            | 0.015 | 0.023 | 0.019 | 0.90       | 0.013         | 0.014         | 0.005 | 0.003      | 0.006 |
| FP024                    | 0.205   | 1.41          | CFP            | 0.255 | 0.042 | 0.636 | 0.01       | 0.012         | 0.038         | 0.004 | 0.006      | 0.003 |
| FP025                    | 0.381   | 1.76          | EVG            | 0.014 | 0.015 | 0.022 | 0.91       | 0.012         | 0.01          | 0.007 | 0.004      | 0.009 |
| FP026                    | 0.184   | 1.37          | CFP            | 0.03  | 0.027 | 0.893 | 0.00       | 0.008         | 0.022         | 0.006 | 0.002      | 0.009 |
| FP027                    | 0.239   | 1.48          | EVG            | 0.023 | 0.035 | 0.022 | 0.81       | 0.054         | 0.017         | 0.031 | 0.006      | 0.004 |
| FP028                    | 0.182   | 1.36          | CFP            | 0.147 | 0.015 | 0.811 | 0.01       | 0.008         | 0.006         | 0.003 | 0.002      | 0.003 |
| FP029                    | 0.214   | 1.43          | CFP            | 0.037 | 0.032 | 0.893 | 0.01       | 0.007         | 0.008         | 0.011 | 0.002      | 0.004 |
| FP030                    | 0.100   | 1.20          | CFP            | 0.511 | 0.04  | 0.398 | 0.01       | 0.02          | 0.009         | 0.004 | 0.003      | 0.004 |
| FP031                    | 0.211   | 1.42          | CFP            | 0.012 | 0.016 | 0.917 | 0.01       | 0.032         | 0.007         | 0.003 | 0.003      | 0.005 |
| FP032                    | 0.139   | 1.28          | CFP            | 0.395 | 0.071 | 0.489 | 0.00       | 0.021         | 0.008         | 0.004 | 0.003      | 0.004 |
| FP033                    | 0.261   | 1.52          | CFP            | 0.029 | 0.027 | 0.917 | 0.00       | 0.009         | 0.006         | 0.003 | 0.002      | 0.003 |
| FP034                    | 0.109   | 1.22          | CFP            | 0.113 | 0.034 | 0.811 | 0.00       | 0.019         | 0.009         | 0.003 | 0.002      | 0.004 |
| FP035                    | 0.091   | 1.18          | CFP            | 0.459 | 0.101 | 0.387 | 0.01       | 0.027         | 0.009         | 0.003 | 0.002      | 0.003 |
| FP036                    | 0.211   | 1.42          | CFP            | 0.017 | 0.049 | 0.833 | 0.01       | 0.044         | 0.026         | 0.004 | 0.004      | 0.014 |
| FP037                    | 0.182   | 1.36          | EVG            | 0.016 | 0.01  | 0.057 | 0.87       | 0.026         | 0.008         | 0.004 | 0.004      | 0.008 |
| FP038                    | 0.125   | 1.25          | CFP            | 0.18  | 0.032 | 0.76  | 0.00       | 0.008         | 0.006         | 0.005 | 0.002      | 0.004 |
| FP039                    | 0.286   | 1.57          | CFP            | 0.221 | 0.091 | 0.526 | 0.01       | 0.121         | 0.017         | 0.006 | 0.005      | 0.006 |
| FP040                    | 0.159   | 1.32          | CFP            | 0.025 | 0.831 | 0.11  | 0.00       | 0.013         | 0.008         | 0.004 | 0.002      | 0.005 |
| FP041                    | 0.214   | 1.43          | CFP            | 0.019 | 0.063 | 0.842 | 0.00       | 0.051         | 0.009         | 0.004 | 0.003      | 0.004 |
| FP042                    | 0.310   | 1.62          | EVG            | 0.016 | 0.012 | 0.018 | 0.86       | 0.018         | 0.009         | 0.024 | 0.031      | 0.009 |
| FP043                    | 0.159   | 1.32          | CFP            | 0.732 | 0.023 | 0.202 | 0.00       | 0.02          | 0.007         | 0.003 | 0.005      | 0.004 |
| FP044                    | 0.281   | 1.56          | CFP            | 0.032 | 0.077 | 0.815 | 0.00       | 0.016         | 0.032         | 0.009 | 0.003      | 0.012 |
| FP045                    | 0.150   | 1.30          | CFP            | 0.91  | 0.025 | 0.017 | 0.00       | 0.011         | 0.023         | 0.004 | 0.003      | 0.003 |
| FP046                    | 0.167   | 1.33          | CFP            | 0.01  | 0.928 | 0.035 | 0.00       | 0.01          | 0.006         | 0.003 | 0.002      | 0.003 |
| FP047                    | 0.219   | 1.44          | CFP            | 0.82  | 0.021 | 0.126 | 0.01       | 0.01          | 0.007         | 0.005 | 0.003      | 0.003 |
| FP048                    | 0.152   | 1.30          | CFP            | 0.758 | 0.03  | 0.176 | 0.00       | 0.016         | 0.009         | 0.003 | 0.002      | 0.003 |
| FP049                    | 0.278   | 1.56          | CFP            | 0.009 | 0.039 | 0.916 | 0.00       | 0.014         | 0.007         | 0.004 | 0.003      | 0.004 |
| FP050                    | 0.150   | 1.30          | CFP            | 0.024 | 0.302 | 0.64  | 0.00       | 0.012         | 0.007         | 0.005 | 0.003      | 0.004 |
| FP051                    | 0.184   | 1.37          | CFP            | 0.011 | 0.157 | 0.798 | 0.00       | 0.01          | 0.01          | 0.004 | 0.002      | 0.005 |
| FP052                    | 0.184   | 1.37          | CFP            | 0.15  | 0.623 | 0.176 | 0.00       | 0.027         | 0.009         | 0.004 | 0.003      | 0.004 |
| FP053                    | 0.194   | 1.39          | CFP            | 0.93  | 0.015 | 0.026 | 0.00       | 0.009         | 0.006         | 0.005 | 0.003      | 0.003 |
| FP054                    | 0.238   | 1.48          | CFP            | 0.162 | 0.037 | 0.761 | 0.01       | 0.016         | 0.008         | 0.003 | 0.002      | 0.004 |
| FP055                    | 0.370   | 1.74          | EVG            | 0.015 | 0.012 | 0.013 | 0.93       | 0.006         | 0.01          | 0.006 | 0.003      | 0.004 |
| FP056                    | 0.143   | 1.29          | CFP            | 0.925 | 0.024 | 0.013 | 0.00       | 0.009         | 0.015         | 0.005 | 0.003      | 0.003 |
| FP057                    | 0.184   | 1.37          | CFP            | 0.503 | 0.019 | 0.436 | 0.00       | 0.017         | 0.009         | 0.003 | 0.003      | 0.005 |

Table S2

**GENETIC DIVERSITY**

**STRUCTURE ANALYSIS (K=9)**

| Field ID & Genetic group | Avg Het | Avg # Alleles | Heritage Calls | CFP   | CFP   | CFP   | EVG +AdmFP | CFP-BC +AdmFP | CFP-BC +AdmFP | AdmFP | AdmFP +SEM | TX-BC |
|--------------------------|---------|---------------|----------------|-------|-------|-------|------------|---------------|---------------|-------|------------|-------|
|                          |         |               |                | 1     | 2     | 3     | 4          | 5             | 6             | 7     | 8          | 9     |
| FP058                    | 0.125   | 1.25          | CFP            | 0.836 | 0.055 | 0.014 | 0.00       | 0.009         | 0.071         | 0.006 | 0.003      | 0.003 |
| FP059                    | 0.273   | 1.55          | CFP            | 0.072 | 0.034 | 0.845 | 0.00       | 0.03          | 0.007         | 0.003 | 0.003      | 0.003 |
| FP060                    | 0.143   | 1.29          | CFP            | 0.041 | 0.859 | 0.039 | 0.00       | 0.021         | 0.025         | 0.003 | 0.002      | 0.005 |
| FP061F1                  | 0.286   | 1.57          | EVG-F1         | 0.009 | 0.006 | 0.007 | 0.86       | 0.008         | 0.054         | 0.005 | 0.04       | 0.012 |
| FP062                    | 0.068   | 1.14          | CFP            | 0.046 | 0.078 | 0.831 | 0.00       | 0.022         | 0.011         | 0.004 | 0.002      | 0.003 |
| FP063                    | 0.136   | 1.27          | CFP            | 0.815 | 0.051 | 0.088 | 0.00       | 0.023         | 0.008         | 0.005 | 0.002      | 0.004 |
| FP064                    | 0.159   | 1.32          | CFP            | 0.025 | 0.054 | 0.887 | 0.00       | 0.014         | 0.008         | 0.003 | 0.002      | 0.004 |
| FP065 /K035F1            | 0.304   | 1.61          | CFP-F1         | 0.006 | 0.005 | 0.006 | 0.00       | 0.005         | 0.959         | 0.003 | 0.003      | 0.008 |
| FP066 /K036F1            | 0.342   | 1.68          | CFP-F1         | 0.031 | 0.106 | 0.019 | 0.01       | 0.014         | 0.321         | 0.01  | 0.005      | 0.489 |
| FP067                    | 0.159   | 1.32          | CFP            | 0.906 | 0.009 | 0.029 | 0.00       | 0.033         | 0.005         | 0.004 | 0.007      | 0.003 |
| FP068                    | 0.262   | 1.52          | CFP            | 0.02  | 0.031 | 0.907 | 0.00       | 0.02          | 0.007         | 0.004 | 0.004      | 0.003 |
| FP069                    | 0.190   | 1.38          | CFP            | 0.816 | 0.095 | 0.047 | 0.00       | 0.019         | 0.008         | 0.006 | 0.002      | 0.004 |
| FP070 / K039             | 0.348   | 1.70          | TX-BC          | 0.007 | 0.009 | 0.007 | 0.00       | 0.01          | 0.012         | 0.009 | 0.006      | 0.938 |
| FP071 / K038             | 0.357   | 1.71          | TX-BC          | 0.004 | 0.005 | 0.005 | 0.00       | 0.005         | 0.007         | 0.014 | 0.005      | 0.953 |
| FP072                    | 0.130   | 1.26          | CFP            | 0.71  | 0.028 | 0.22  | 0.00       | 0.017         | 0.01          | 0.004 | 0.002      | 0.004 |
| FP073 /K018F1            | 0.341   | 1.68          | CFP-F1         | 0.056 | 0.034 | 0.118 | 0.01       | 0.027         | 0.016         | 0.007 | 0.004      | 0.73  |
| FP074                    | 0.281   | 1.56          | CFP-BC         | 0.017 | 0.127 | 0.479 | 0.00       | 0.024         | 0.03          | 0.006 | 0.013      | 0.299 |
| FP075                    | 0.159   | 1.32          | CFP            | 0.905 | 0.028 | 0.032 | 0.00       | 0.014         | 0.01          | 0.003 | 0.002      | 0.003 |
| FP076                    | 0.275   | 1.55          | CFP            | 0.033 | 0.031 | 0.895 | 0.00       | 0.016         | 0.012         | 0.003 | 0.003      | 0.003 |
| FP077                    | 0.275   | 1.55          | CFP-BC         | 0.152 | 0.046 | 0.176 | 0.01       | 0.037         | 0.028         | 0.016 | 0.005      | 0.533 |
| FP078                    | 0.175   | 1.35          | CFP            | 0.884 | 0.019 | 0.034 | 0.00       | 0.044         | 0.007         | 0.003 | 0.002      | 0.003 |
| FP079 /K019F1            | 0.348   | 1.70          | CFP-F1         | 0.007 | 0.009 | 0.007 | 0.01       | 0.006         | 0.009         | 0.004 | 0.003      | 0.949 |
| FP080                    | 0.075   | 1.15          | CFP            | 0.013 | 0.888 | 0.067 | 0.00       | 0.014         | 0.007         | 0.004 | 0.002      | 0.003 |
| FP081                    | 0.152   | 1.30          | CFP            | 0.014 | 0.849 | 0.031 | 0.00       | 0.059         | 0.014         | 0.014 | 0.007      | 0.008 |
| FP082                    | 0.182   | 1.36          | CFP            | 0.037 | 0.795 | 0.135 | 0.00       | 0.016         | 0.006         | 0.003 | 0.002      | 0.003 |
| FP083 /K62F1             | 0.341   | 1.68          | CFP-F1         | 0.044 | 0.178 | 0.045 | 0.01       | 0.035         | 0.031         | 0.643 | 0.004      | 0.015 |
| FP084                    | 0.214   | 1.43          | CFP-BC         | 0.137 | 0.018 | 0.406 | 0.02       | 0.03          | 0.023         | 0.007 | 0.007      | 0.356 |
| FP085 / K059             | 0.227   | 1.46          | EVG-BC         | 0.007 | 0.004 | 0.005 | 0.94       | 0.006         | 0.007         | 0.004 | 0.023      | 0.003 |
| FP086 / K068             | 0.227   | 1.46          | TX-BC          | 0.006 | 0.005 | 0.006 | 0.00       | 0.005         | 0.017         | 0.005 | 0.004      | 0.949 |
| FP087 / K060             | 0.286   | 1.57          | EVG-BC         | 0.007 | 0.01  | 0.011 | 0.57       | 0.008         | 0.015         | 0.003 | 0.004      | 0.371 |
| FP088 / K064             | 0.196   | 1.39          | TX-BC          | 0.006 | 0.008 | 0.006 | 0.01       | 0.007         | 0.011         | 0.008 | 0.004      | 0.946 |
| FP089                    | 0.065   | 1.13          | CFP            | 0.046 | 0.694 | 0.217 | 0.00       | 0.017         | 0.009         | 0.004 | 0.003      | 0.006 |
| FP090 / K067             | 0.238   | 1.48          | TX-BC          | 0.005 | 0.007 | 0.005 | 0.00       | 0.007         | 0.014         | 0.007 | 0.003      | 0.947 |
| FP091 / K066             | 0.261   | 1.52          | TX-BC          | 0.016 | 0.018 | 0.016 | 0.00       | 0.026         | 0.03          | 0.009 | 0.005      | 0.875 |
| FP092 / K065             | 0.200   | 1.40          | TX-BC          | 0.018 | 0.025 | 0.017 | 0.01       | 0.019         | 0.032         | 0.006 | 0.004      | 0.874 |
| FP093 / K058             | 0.364   | 1.73          | TX-BC          | 0.003 | 0.004 | 0.004 | 0.00       | 0.004         | 0.006         | 0.008 | 0.005      | 0.963 |
| FP094F1                  | 0.405   | 1.81          | EVG-F1         | 0.008 | 0.005 | 0.019 | 0.56       | 0.007         | 0.007         | 0.152 | 0.01       | 0.227 |
| FP095 /K045F1            | 0.326   | 1.65          | EVG-F1         | 0.015 | 0.013 | 0.024 | 0.85       | 0.012         | 0.049         | 0.006 | 0.015      | 0.02  |
| FP096 / K080             | 0.136   | 1.27          | CFP-BC         | 0.89  | 0.014 | 0.024 | 0.00       | 0.017         | 0.008         | 0.031 | 0.002      | 0.01  |
| FP097                    | 0.105   | 1.21          | CFP            | 0.577 | 0.27  | 0.08  | 0.00       | 0.046         | 0.013         | 0.004 | 0.003      | 0.005 |
| FP098                    | 0.109   | 1.22          | CFP            | 0.021 | 0.911 | 0.042 | 0.00       | 0.01          | 0.006         | 0.003 | 0.002      | 0.003 |
| FP099                    | 0.100   | 1.20          | CFP            | 0.935 | 0.019 | 0.016 | 0.00       | 0.011         | 0.007         | 0.004 | 0.002      | 0.003 |
| FP100                    | 0.087   | 1.17          | CFP            | 0.798 | 0.057 | 0.092 | 0.00       | 0.033         | 0.007         | 0.004 | 0.003      | 0.004 |
| FP101                    | 0.136   | 1.27          | CFP            | 0.017 | 0.771 | 0.178 | 0.00       | 0.015         | 0.007         | 0.003 | 0.003      | 0.004 |
| FP102 / K048             | 0.283   | 1.57          | EVG-BC         | 0.004 | 0.005 | 0.006 | 0.57       | 0.005         | 0.005         | 0.004 | 0.004      | 0.394 |
| FP103                    | 0.341   | 1.68          | TX-BC+EVG      | 0.007 | 0.006 | 0.007 | 0.35       | 0.006         | 0.012         | 0.003 | 0.004      | 0.61  |
| FP104                    | 0.250   | 1.50          | TX-BC          | 0.004 | 0.005 | 0.004 | 0.00       | 0.004         | 0.007         | 0.003 | 0.003      | 0.968 |
| FP105                    | 0.132   | 1.26          | CFP            | 0.902 | 0.032 | 0.027 | 0.00       | 0.018         | 0.008         | 0.003 | 0.003      | 0.004 |
| FP106                    | 0.150   | 1.30          | CFP            | 0.873 | 0.061 | 0.036 | 0.00       | 0.011         | 0.006         | 0.005 | 0.002      | 0.004 |
| FP107 / K079             | 0.095   | 1.19          | CFP-BC         | 0.538 | 0.018 | 0.026 | 0.00       | 0.399         | 0.008         | 0.003 | 0.002      | 0.003 |
| FP108 / K090             | 0.250   | 1.50          | TX-BC+EVG      | 0.013 | 0.025 | 0.02  | 0.58       | 0.019         | 0.071         | 0.007 | 0.008      | 0.254 |
| FP109                    | 0.152   | 1.30          | CFP            | 0.026 | 0.903 | 0.038 | 0.00       | 0.01          | 0.011         | 0.004 | 0.002      | 0.004 |
| FP110 / K086             | 0.348   | 1.70          | CFP-BC         | 0.038 | 0.137 | 0.036 | 0.00       | 0.036         | 0.738         | 0.004 | 0.003      | 0.005 |
| FP111                    | 0.239   | 1.48          | CFP            | 0.056 | 0.667 | 0.226 | 0.00       | 0.012         | 0.017         | 0.007 | 0.005      | 0.005 |
| FP112                    | 0.152   | 1.30          | CFP            | 0.028 | 0.911 | 0.019 | 0.00       | 0.016         | 0.014         | 0.004 | 0.002      | 0.003 |
| FP113                    | 0.167   | 1.33          | CFP            | 0.886 | 0.018 | 0.046 | 0.00       | 0.032         | 0.007         | 0.003 | 0.002      | 0.003 |
| FP114                    | 0.125   | 1.25          | CFP            | 0.821 | 0.067 | 0.032 | 0.00       | 0.058         | 0.008         | 0.004 | 0.003      | 0.004 |
| FP115                    | 0.182   | 1.36          | CFP            | 0.085 | 0.822 | 0.057 | 0.00       | 0.008         | 0.007         | 0.014 | 0.002      | 0.003 |

**GENETIC DIVERSITY**

**STRUCTURE ANALYSIS (K=9)**

| Field ID & Genetic group | Avg Het | Avg # Alleles | Heritage Calls | CFP   | CFP   | CFP   | EVG +AdmFP | CFP-BC +AdmFP | CFP-BC +AdmFP | AdmFP | AdmFP +SEM | TX-BC |
|--------------------------|---------|---------------|----------------|-------|-------|-------|------------|---------------|---------------|-------|------------|-------|
|                          |         |               |                | 1     | 2     | 3     | 4          | 5             | 6             | 7     | 8          | 9     |
| FP116                    | 0.174   | 1.35          | CFP            | 0.509 | 0.227 | 0.219 | 0.00       | 0.012         | 0.017         | 0.005 | 0.002      | 0.005 |
| FP117                    | 0.357   | 1.71          | SEM+AdmFP      | 0.024 | 0.077 | 0.28  | 0.01       | 0.094         | 0.015         | 0.057 | 0.391      | 0.053 |
| FP118                    | 0.273   | 1.55          | SEM+AdmFP      | 0.05  | 0.044 | 0.047 | 0.01       | 0.23          | 0.119         | 0.045 | 0.443      | 0.015 |
| FP119 / K115             | 0.250   | 1.50          | TX-BC          | 0.007 | 0.005 | 0.007 | 0.01       | 0.008         | 0.013         | 0.004 | 0.006      | 0.945 |
| FP120                    | 0.295   | 1.59          | TX-BC          | 0.009 | 0.009 | 0.008 | 0.00       | 0.009         | 0.009         | 0.006 | 0.004      | 0.944 |
| FP121                    | 0.261   | 1.52          | SEM+AdmFP      | 0.037 | 0.265 | 0.099 | 0.01       | 0.253         | 0.009         | 0.022 | 0.304      | 0.007 |
| FP122                    | 0.136   | 1.27          | CFP            | 0.024 | 0.939 | 0.012 | 0.00       | 0.008         | 0.006         | 0.004 | 0.002      | 0.003 |
| FP123                    | 0.200   | 1.40          | CFP-BC         | 0.055 | 0.029 | 0.109 | 0.03       | 0.411         | 0.047         | 0.008 | 0.008      | 0.307 |
| FP124                    | 0.227   | 1.46          | AdmFP+EVG      | 0.029 | 0.017 | 0.02  | 0.48       | 0.013         | 0.248         | 0.004 | 0.005      | 0.189 |
| FP125                    | 0.318   | 1.64          | AdmFP+EVG      | 0.043 | 0.024 | 0.027 | 0.16       | 0.03          | 0.417         | 0.038 | 0.019      | 0.244 |
| FP126                    | 0.281   | 1.56          | AdmFP+EVG      | 0.009 | 0.008 | 0.009 | 0.48       | 0.012         | 0.022         | 0.005 | 0.024      | 0.43  |
| FP127                    | 0.304   | 1.61          | TX-BC          | 0.008 | 0.01  | 0.008 | 0.00       | 0.014         | 0.019         | 0.008 | 0.01       | 0.919 |
| FP128 / K082             | 0.159   | 1.32          | CFP-BC         | 0.244 | 0.027 | 0.079 | 0.01       | 0.402         | 0.049         | 0.004 | 0.084      | 0.103 |
| FP129 / K089             | 0.190   | 1.38          | TX-BC+EVG      | 0.014 | 0.022 | 0.053 | 0.15       | 0.011         | 0.033         | 0.006 | 0.004      | 0.704 |
| FP130 / K150             | 0.261   | 1.52          | CFP-BC+EVG     | 0.065 | 0.123 | 0.05  | 0.17       | 0.044         | 0.521         | 0.004 | 0.003      | 0.02  |
| FP131                    | 0.283   | 1.57          | AdmFP+EVG      | 0.005 | 0.006 | 0.005 | 0.28       | 0.004         | 0.007         | 0.003 | 0.003      | 0.684 |
| FP132                    | 0.413   | 1.83          | SEM+AdmFP      | 0.022 | 0.208 | 0.065 | 0.01       | 0.01          | 0.048         | 0.025 | 0.603      | 0.015 |
| FP133                    | 0.182   | 1.36          | CFP-BC         | 0.241 | 0.111 | 0.034 | 0.00       | 0.015         | 0.308         | 0.007 | 0.003      | 0.279 |
| FP134                    | 0.286   | 1.57          | CFP-BC+EVG     | 0.163 | 0.076 | 0.077 | 0.29       | 0.019         | 0.303         | 0.006 | 0.005      | 0.059 |
| FP135 / K147             | 0.283   | 1.57          | CFP-BC         | 0.013 | 0.049 | 0.103 | 0.00       | 0.014         | 0.797         | 0.003 | 0.003      | 0.015 |
| FP136                    | 0.273   | 1.55          | TX-BC          | 0.004 | 0.004 | 0.004 | 0.00       | 0.004         | 0.006         | 0.004 | 0.004      | 0.967 |
| FP137                    | 0.286   | 1.57          | AdmFP+SEM      | 0.011 | 0.049 | 0.011 | 0.00       | 0.011         | 0.792         | 0.018 | 0.066      | 0.039 |
| FP138                    | 0.283   | 1.57          | CFP-BC+SEM     | 0.042 | 0.152 | 0.05  | 0.06       | 0.53          | 0.008         | 0.076 | 0.071      | 0.011 |
| FP139                    | 0.079   | 1.16          | CFP            | 0.078 | 0.834 | 0.051 | 0.00       | 0.011         | 0.012         | 0.004 | 0.003      | 0.004 |
| FP140                    | 0.184   | 1.37          | CFP-BC+SEM     | 0.03  | 0.169 | 0.051 | 0.01       | 0.672         | 0.02          | 0.034 | 0.009      | 0.01  |
| FP141                    | 0.261   | 1.52          | CFP-BC         | 0.057 | 0.309 | 0.308 | 0.01       | 0.04          | 0.024         | 0.01  | 0.229      | 0.008 |
| FP142                    | 0.174   | 1.35          | EVG-BC         | 0.007 | 0.004 | 0.004 | 0.95       | 0.006         | 0.007         | 0.003 | 0.018      | 0.004 |
| FP143                    | 0.310   | 1.62          | SEM+AdmFP      | 0.147 | 0.222 | 0.05  | 0.00       | 0.021         | 0.029         | 0.025 | 0.376      | 0.128 |
| FP144                    | 0.250   | 1.50          | CFP-BC         | 0.078 | 0.028 | 0.025 | 0.04       | 0.079         | 0.696         | 0.015 | 0.029      | 0.01  |
| FP145                    | 0.375   | 1.75          | AdmFP+EVG      | 0.056 | 0.037 | 0.034 | 0.51       | 0.117         | 0.024         | 0.086 | 0.006      | 0.135 |
| FP146                    | 0.250   | 1.50          | AdmFP          | 0.023 | 0.113 | 0.03  | 0.02       | 0.04          | 0.051         | 0.716 | 0.003      | 0.009 |
| FP147 / K184             | 0.227   | 1.46          | AdmFP+SEM      | 0.016 | 0.144 | 0.018 | 0.01       | 0.139         | 0.362         | 0.009 | 0.11       | 0.19  |
| FP148                    | 0.182   | 1.36          | AdmFP          | 0.215 | 0.022 | 0.019 | 0.003      | 0.022         | 0.009         | 0.701 | 0.004      | 0.004 |
| FP149                    | 0.275   | 1.55          | AdmFP+EVG      | 0.019 | 0.048 | 0.029 | 0.23       | 0.042         | 0.011         | 0.604 | 0.004      | 0.014 |
| FP150 / K152             | 0.261   | 1.52          | CFP-BC         | 0.027 | 0.236 | 0.012 | 0.00       | 0.016         | 0.123         | 0.016 | 0.008      | 0.557 |
| FP151 / K113             | 0.304   | 1.61          | TX-BC          | 0.005 | 0.006 | 0.006 | 0.00       | 0.004         | 0.007         | 0.004 | 0.003      | 0.963 |
| FP152                    | 0.275   | 1.55          | CFP-BC         | 0.071 | 0.277 | 0.062 | 0.01       | 0.06          | 0.053         | 0.443 | 0.004      | 0.021 |
| FP153                    | 0.152   | 1.30          | TX-BC          | 0.004 | 0.008 | 0.006 | 0.00       | 0.005         | 0.02          | 0.004 | 0.003      | 0.948 |
| FP154                    | 0.261   | 1.52          | AdmFP          | 0.114 | 0.053 | 0.066 | 0.00       | 0.019         | 0.098         | 0.006 | 0.004      | 0.637 |
| FP155                    | 0.211   | 1.42          | CFP-BC         | 0.012 | 0.184 | 0.079 | 0.01       | 0.289         | 0.014         | 0.124 | 0.146      | 0.146 |
| FP156                    | 0.263   | 1.53          | AdmFP          | 0.015 | 0.044 | 0.023 | 0.00       | 0.02          | 0.843         | 0.007 | 0.007      | 0.036 |
| FP157                    | 0.132   | 1.26          | CFP-BC+SEM     | 0.033 | 0.364 | 0.027 | 0.01       | 0.021         | 0.515         | 0.005 | 0.013      | 0.018 |
| FP158                    | 0.194   | 1.39          | TX-BC          | 0.018 | 0.055 | 0.011 | 0.01       | 0.016         | 0.077         | 0.721 | 0.005      | 0.092 |
| FP159                    | 0.176   | 1.35          | CFP-BC         | 0.039 | 0.154 | 0.145 | 0.01       | 0.169         | 0.443         | 0.006 | 0.015      | 0.025 |
| FP160                    | 0.139   | 1.28          | CFP            | 0.151 | 0.026 | 0.763 | 0.00       | 0.019         | 0.024         | 0.004 | 0.003      | 0.005 |
| FP161 / K169             | 0.235   | 1.47          | TX-BC          | 0.014 | 0.014 | 0.016 | 0.01       | 0.026         | 0.012         | 0.011 | 0.009      | 0.893 |
| FP162                    |         |               | Unknown        |       |       |       |            |               |               |       |            |       |
| FP163 / K227             | 0.261   | 1.52          | AdmFP          | 0.106 | 0.035 | 0.019 | 0.00       | 0.024         | 0.058         | 0.015 | 0.005      | 0.735 |
| FP164                    |         |               | Unknown        |       |       |       |            |               |               |       |            |       |
| FP165                    |         |               | Unknown        |       |       |       |            |               |               |       |            |       |
| FP166                    |         |               | Unknown        |       |       |       |            |               |               |       |            |       |
| FP167                    |         |               | Unknown        |       |       |       |            |               |               |       |            |       |
| FP168                    |         |               | Unknown        |       |       |       |            |               |               |       |            |       |
| FP169                    |         |               | Unknown        |       |       |       |            |               |               |       |            |       |
| FP170                    |         |               | Unknown        |       |       |       |            |               |               |       |            |       |
| FP171                    |         |               | Unknown        |       |       |       |            |               |               |       |            |       |
| FP172                    |         |               | Unknown        |       |       |       |            |               |               |       |            |       |
| FP173                    |         |               | Unknown        |       |       |       |            |               |               |       |            |       |

**GENETIC DIVERSITY**

**STRUCTURE ANALYSIS (K=9)**

| Field ID & Genetic group | Avg Het | Avg # Alleles | Heritage Calls | CFP   | CFP   | CFP   | EVG +AdmFP | CFP-BC +AdmFP | CFP-BC +AdmFP | AdmFP | AdmFP +SEM | TX-BC |
|--------------------------|---------|---------------|----------------|-------|-------|-------|------------|---------------|---------------|-------|------------|-------|
|                          |         |               |                | 1     | 2     | 3     | 4          | 5             | 6             | 7     | 8          | 9     |
| FP174                    |         |               | Unknown        |       |       |       |            |               |               |       |            |       |
| FP175 / K254             | 0.263   | 1.53          | AdmFP+SEM      | 0.03  | 0.201 | 0.016 | 0.01       | 0.249         | 0.109         | 0.042 | 0.007      | 0.34  |
| FP176                    |         |               | Unknown        |       |       |       |            |               |               |       |            |       |
| FP177 / K235             | 0.250   | 1.50          | CFP-BC         | 0.232 | 0.021 | 0.072 | 0.01       | 0.049         | 0.061         | 0.005 | 0.004      | 0.549 |
| FP178                    |         |               | Unknown        |       |       |       |            |               |               |       |            |       |
| FP179                    |         |               | Unknown        |       |       |       |            |               |               |       |            |       |
| FP180 / K264             | 0.167   | 1.33          | AdmFP+SEM      | 0.022 | 0.295 | 0.065 | 0.01       | 0.03          | 0.21          | 0.009 | 0.006      | 0.358 |
| FP181 / K093             | 0.348   | 1.70          | TX-BC          | 0.046 | 0.018 | 0.087 | 0.01       | 0.034         | 0.039         | 0.752 | 0.003      | 0.015 |
| FP182 / K279             |         |               | AdmFP          |       |       |       |            |               |               |       |            |       |
| FP200 "Big Guy"          | 0.295   | 1.59          | EVG            | 0.118 | 0.037 | 0.264 | 0.48       | 0.04          | 0.021         | 0.032 | 0.008      | 0.005 |
| FP201                    | 0.206   | 1.41          | CFP            | 0.093 | 0.072 | 0.774 | 0.00       | 0.038         | 0.008         | 0.004 | 0.003      | 0.004 |
| FP202                    | 0.184   | 1.37          | EVG x CFP      | 0.009 | 0.024 | 0.381 | 0.54       | 0.026         | 0.008         | 0.004 | 0.004      | 0.006 |
| FP203                    | 0.167   | 1.33          | EVG x CFP      | 0.015 | 0.01  | 0.588 | 0.35       | 0.021         | 0.006         | 0.003 | 0.003      | 0.004 |
| FP204                    | 0.152   | 1.30          | CFP            | 0.238 | 0.011 | 0.717 | 0.01       | 0.012         | 0.008         | 0.003 | 0.002      | 0.003 |
| FP205                    | 0.114   | 1.23          | CFP            | 0.916 | 0.029 | 0.029 | 0.00       | 0.007         | 0.006         | 0.003 | 0.002      | 0.003 |
| FP206                    | 0.158   | 1.32          | CFP            | 0.076 | 0.104 | 0.761 | 0.00       | 0.011         | 0.022         | 0.007 | 0.002      | 0.014 |
| FP207                    | 0.159   | 1.32          | CFP            | 0.017 | 0.02  | 0.917 | 0.00       | 0.008         | 0.021         | 0.005 | 0.002      | 0.007 |
| FP208                    | 0.109   | 1.22          | CFP            | 0.745 | 0.03  | 0.19  | 0.00       | 0.016         | 0.006         | 0.003 | 0.002      | 0.003 |
| FP209                    | 0.239   | 1.48          | EVG            | 0.119 | 0.102 | 0.114 | 0.61       | 0.012         | 0.028         | 0.004 | 0.003      | 0.005 |
| FP210                    | 0.312   | 1.63          | EVG            | 0.017 | 0.021 | 0.016 | 0.87       | 0.021         | 0.02          | 0.008 | 0.008      | 0.016 |
| UCFP002                  | 0.227   | 1.46          | CFP            | 0.03  | 0.018 | 0.921 | 0.00       | 0.007         | 0.006         | 0.005 | 0.002      | 0.007 |
| UCFP003                  |         |               | CFP            |       |       |       |            |               |               |       |            |       |
| UCFP004                  |         |               | CFP            |       |       |       |            |               |               |       |            |       |
| UCFP005                  | 0.062   | 1.13          | CFP            |       |       |       |            |               |               |       |            |       |
| UCFP006                  | 0.194   | 1.39          | CFP            | 0.159 | 0.017 | 0.774 | 0.01       | 0.008         | 0.014         | 0.006 | 0.003      | 0.004 |
| UCFP007                  |         |               | CFP            |       |       |       |            |               |               |       |            |       |
| UCFP008                  | 0.341   | 1.68          | EVG            | 0.398 | 0.022 | 0.035 | 0.48       | 0.031         | 0.009         | 0.017 | 0.004      | 0.003 |
| UCFP009                  | 0.143   | 1.29          | CFP            | 0.024 | 0.122 | 0.734 | 0.01       | 0.015         | 0.007         | 0.067 | 0.018      | 0.005 |
| UCFP010                  | 0.325   | 1.65          | Released       | 0.02  | 0.085 | 0.026 | 0.01       | 0.016         | 0.06          | 0.007 | 0.767      | 0.014 |
| UCFP011                  | 0.316   | 1.63          | Released       | 0.019 | 0.009 | 0.048 | 0.32       | 0.02          | 0.049         | 0.14  | 0.378      | 0.021 |
| UCFP012                  | 0.261   | 1.52          | CFP            | 0.035 | 0.124 | 0.78  | 0.03       | 0.009         | 0.005         | 0.003 | 0.003      | 0.009 |
| UCFP013                  |         |               | CFP            |       |       |       |            |               |               |       |            |       |
| UCFP014                  |         |               | CFP            |       |       |       |            |               |               |       |            |       |
| UCFP015                  | 0.250   | 1.50          | CFP            | 0.014 | 0.023 | 0.936 | 0.00       | 0.007         | 0.008         | 0.003 | 0.002      | 0.003 |
| UCFP017                  |         |               | CFP            |       |       |       |            |               |               |       |            |       |
| UCFP018                  | 0.114   | 1.23          | CFP            | 0.786 | 0.049 | 0.104 | 0.00       | 0.036         | 0.013         | 0.003 | 0.002      | 0.003 |
| UCFP019                  | 0.275   | 1.55          | CFP            | 0.05  | 0.043 | 0.873 | 0.00       | 0.014         | 0.008         | 0.003 | 0.002      | 0.003 |
| UCFP020                  | 0.176   | 1.35          | CFP            | 0.631 | 0.054 | 0.254 | 0.00       | 0.02          | 0.013         | 0.013 | 0.004      | 0.007 |
| UCFP021                  | 0.188   | 1.38          | CFP            | 0.863 | 0.064 | 0.033 | 0.00       | 0.016         | 0.009         | 0.004 | 0.003      | 0.004 |
| UCFP022                  | 0.167   | 1.33          | CFP            | 0.621 | 0.177 | 0.067 | 0.00       | 0.084         | 0.021         | 0.017 | 0.004      | 0.006 |
| UCFP023                  | 0.130   | 1.26          | CFP            | 0.025 | 0.702 | 0.233 | 0.00       | 0.014         | 0.013         | 0.003 | 0.002      | 0.004 |
| UCFP024                  |         |               | CFP            |       |       |       |            |               |               |       |            |       |
| UCFP025                  | 0.205   | 1.41          | CFP            | 0.042 | 0.762 | 0.157 | 0.00       | 0.017         | 0.009         | 0.004 | 0.003      | 0.004 |
| UCFP026                  | 0.159   | 1.32          | CFP            | 0.928 | 0.015 | 0.031 | 0.00       | 0.009         | 0.006         | 0.004 | 0.002      | 0.003 |
| UCFP027                  | 0.114   | 1.23          | CFP            | 0.912 | 0.023 | 0.035 | 0.00       | 0.01          | 0.008         | 0.003 | 0.002      | 0.004 |
| UCFP028                  | 0.174   | 1.35          | CFP            | 0.894 | 0.049 | 0.025 | 0.00       | 0.007         | 0.011         | 0.004 | 0.003      | 0.004 |
| UCFP029                  | 0.114   | 1.23          | CFP            | 0.03  | 0.871 | 0.046 | 0.00       | 0.033         | 0.008         | 0.004 | 0.002      | 0.004 |
| UCFP030                  | 0.167   | 1.33          | Unknown        |       |       |       |            |               |               |       |            |       |
| UCFP031                  |         |               | CFP            |       |       |       |            |               |               |       |            |       |
| UCFP032                  |         |               | Unknown        |       |       |       |            |               |               |       |            |       |
| UCFP033                  | 0.188   | 1.38          | CFP-BC+SEM     | 0.071 | 0.628 | 0.052 | 0.01       | 0.087         | 0.01          | 0.037 | 0.1        | 0.006 |
| UCFP034                  | 0.262   | 1.52          | SEM+AdmFP      | 0.016 | 0.731 | 0.021 | 0.01       | 0.012         | 0.01          | 0.004 | 0.192      | 0.004 |
| UCFP035                  | 0.190   | 1.38          | CFP            | 0.017 | 0.919 | 0.018 | 0.00       | 0.011         | 0.013         | 0.008 | 0.004      | 0.007 |
| UCFP036                  | 0.114   | 1.23          | CFP-BC         | 0.279 | 0.545 | 0.043 | 0.00       | 0.028         | 0.071         | 0.005 | 0.01       | 0.017 |
| UCFP037                  | 0.190   | 1.38          | CFP-BC         | 0.027 | 0.476 | 0.313 | 0.01       | 0.028         | 0.106         | 0.008 | 0.004      | 0.031 |
| UCFP038                  | 0.194   | 1.39          | SEM+AdmFP      | 0.019 | 0.648 | 0.013 | 0.01       | 0.034         | 0.01          | 0.051 | 0.215      | 0.006 |
| UCFP039                  | 0.326   | 1.65          | CFP-BC+EVG     | 0.047 | 0.164 | 0.023 | 0.32       | 0.019         | 0.317         | 0.035 | 0.003      | 0.074 |
| UCFP040                  | 0.286   | 1.57          | CFP-BC+EVG     | 0.05  | 0.204 | 0.025 | 0.30       | 0.011         | 0.105         | 0.008 | 0.003      | 0.291 |

**GENETIC DIVERSITY**

**STRUCTURE ANALYSIS (K=9)**

| Field ID & Genetic group | Avg Het | Avg # Alleles | Heritage Calls | CFP   | CFP   | CFP   | EVG +AdmFP | CFP-BC +AdmFP | CFP-BC +AdmFP | AdmFP | AdmFP +SEM | TX-BC |
|--------------------------|---------|---------------|----------------|-------|-------|-------|------------|---------------|---------------|-------|------------|-------|
|                          |         |               |                | 1     | 2     | 3     | 4          | 5             | 6             | 7     | 8          | 9     |
| UCFP041                  | 0.235   | 1.47          | CFP-BC         | 0.029 | 0.633 | 0.183 | 0.01       | 0.037         | 0.072         | 0.025 | 0.003      | 0.008 |
| UCFP042                  | 0.100   | 1.20          | CFP-BC+SEM     | 0.034 | 0.089 | 0.019 | 0.01       | 0.777         | 0.022         | 0.008 | 0.039      | 0.006 |
| UCFP043                  | 0.239   | 1.48          | SEM+AdmFP      | 0.023 | 0.386 | 0.071 | 0.00       | 0.246         | 0.01          | 0.011 | 0.24       | 0.01  |
| UCFP044                  | 0.100   | 1.20          | CFP            |       |       |       |            |               |               |       |            |       |
| UCFP045                  | 0.152   | 1.30          | CFP            | 0.028 | 0.915 | 0.019 | 0.00       | 0.012         | 0.013         | 0.003 | 0.002      | 0.004 |
| UCFP046                  | 0.304   | 1.61          | CFP-BC+EVG     | 0.232 | 0.119 | 0.061 | 0.25       | 0.052         | 0.045         | 0.01  | 0.004      | 0.226 |
| UCFP047                  |         |               | CFP            |       |       |       |            |               |               |       |            |       |
| UCFP048                  | 0.152   | 1.30          | CFP-BC         | 0.02  | 0.066 | 0.04  | 0.01       | 0.146         | 0.672         | 0.004 | 0.012      | 0.033 |
| UCFP049 /K98             | 0.167   | 1.33          | CFP-BC+EVG     | 0.72  | 0.119 | 0.03  | 0.07       | 0.024         | 0.01          | 0.012 | 0.007      | 0.003 |
| UCFP050                  | 0.143   | 1.29          | CFP            | 0.332 | 0.143 | 0.442 | 0.00       | 0.059         | 0.011         | 0.004 | 0.002      | 0.004 |
| UCFP051                  | 0.174   | 1.35          | TX-BC          | 0.006 | 0.009 | 0.008 | 0.00       | 0.008         | 0.011         | 0.019 | 0.003      | 0.933 |
| UCFP052                  | 0.000   | 1.00          | Unknown        |       |       |       |            |               |               |       |            |       |
| UCFP053                  | 0.143   | 1.29          | CFP-BC+SEM     | 0.628 | 0.226 | 0.024 | 0.03       | 0.021         | 0.039         | 0.005 | 0.024      | 0.004 |
| UCFP054                  | 0.114   | 1.23          | CFP            | 0.073 | 0.861 | 0.026 | 0.00       | 0.019         | 0.01          | 0.003 | 0.002      | 0.003 |
| UCFP055                  | 0.196   | 1.39          | SEM+AdmFP      | 0.078 | 0.042 | 0.048 | 0.00       | 0.233         | 0.032         | 0.005 | 0.552      | 0.005 |
| UCFP056                  | 0.304   | 1.61          | SEM+AdmFP      | 0.181 | 0.047 | 0.043 | 0.00       | 0.046         | 0.03          | 0.013 | 0.63       | 0.006 |
| UCFP057                  | 0.235   | 1.47          | SEM+AdmFP      | 0.157 | 0.112 | 0.034 | 0.00       | 0.212         | 0.075         | 0.01  | 0.385      | 0.011 |
| UCFP058                  | 0.205   | 1.41          | CFP            | 0.399 | 0.094 | 0.465 | 0.01       | 0.018         | 0.009         | 0.004 | 0.002      | 0.003 |
| UCFP059                  | 0.227   | 1.46          | CFP-BC+SEM     | 0.015 | 0.054 | 0.021 | 0.00       | 0.576         | 0.052         | 0.006 | 0.012      | 0.261 |
| UCFP060                  | 0.217   | 1.44          | TX-BC          | 0.099 | 0.073 | 0.027 | 0.00       | 0.038         | 0.01          | 0.743 | 0.004      | 0.004 |
| UCFP061                  | 0.217   | 1.44          | CFP-BC+SEM     | 0.037 | 0.008 | 0.02  | 0.01       | 0.591         | 0.308         | 0.016 | 0.005      | 0.006 |
| UCFP062                  | 0.238   | 1.48          | AdmFP+EVG      | 0.029 | 0.007 | 0.017 | 0.14       | 0.011         | 0.025         | 0.005 | 0.071      | 0.692 |
| UCFP063                  | 0.136   | 1.27          | CFP            | 0.878 | 0.032 | 0.06  | 0.00       | 0.011         | 0.007         | 0.003 | 0.002      | 0.003 |
| UCFP064                  | 0.167   | 1.33          | AdmFP+EVG      |       |       |       |            |               |               |       |            |       |
| UCFP065                  | 0.159   | 1.32          | CFP-BC         | 0.053 | 0.452 | 0.082 | 0.02       | 0.019         | 0.3           | 0.007 | 0.003      | 0.063 |
| UCFP066                  | 0.114   | 1.23          | CFP-BC         | 0.824 | 0.043 | 0.084 | 0.00       | 0.017         | 0.007         | 0.015 | 0.004      | 0.003 |
| UCFP067                  | 0.159   | 1.32          | CFP-BC+SEM     | 0.027 | 0.016 | 0.011 | 0.00       | 0.927         | 0.005         | 0.003 | 0.003      | 0.003 |
| UCFP068                  | 0.281   | 1.56          | AdmFP          | 0.025 | 0.037 | 0.032 | 0.01       | 0.085         | 0.056         | 0.025 | 0.005      | 0.724 |
| UCFP069                  | 0.206   | 1.41          | CFP-BC+SEM     | 0.037 | 0.103 | 0.08  | 0.01       | 0.541         | 0.069         | 0.069 | 0.047      | 0.049 |
| UCFP070                  | 0.250   | 1.50          | AdmFP          | 0.012 | 0.005 | 0.011 | 0.01       | 0.006         | 0.576         | 0.003 | 0.005      | 0.376 |
| UCFP071                  | 0.273   | 1.55          | AdmFP          | 0.005 | 0.006 | 0.005 | 0.01       | 0.015         | 0.01          | 0.011 | 0.011      | 0.932 |
| UCFP072                  | 0.286   | 1.57          | CFP-BC         | 0.04  | 0.206 | 0.04  | 0.00       | 0.058         | 0.016         | 0.624 | 0.005      | 0.006 |
| UCFP073                  | 0.227   | 1.46          | CFP-BC         | 0.042 | 0.058 | 0.242 | 0.00       | 0.074         | 0.032         | 0.54  | 0.002      | 0.006 |
| UCFP074                  | 0.196   | 1.39          | CFP-BC         | 0.085 | 0.094 | 0.091 | 0.00       | 0.684         | 0.026         | 0.009 | 0.003      | 0.005 |
| UCFP075                  | 0.174   | 1.35          | AdmFP+SEM      | 0.01  | 0.007 | 0.008 | 0.01       | 0.015         | 0.836         | 0.003 | 0.074      | 0.037 |
| UCFP076                  | 0.273   | 1.55          | CFP-BC+EVG     | 0.076 | 0.106 | 0.109 | 0.07       | 0.013         | 0.036         | 0.465 | 0.03       | 0.091 |
| UCFP077                  | 0.233   | 1.47          | AdmFP          | 0.009 | 0.008 | 0.008 | 0.01       | 0.011         | 0.866         | 0.007 | 0.073      | 0.013 |
| UCFP078                  | 0.227   | 1.46          | CFP-BC         | 0.057 | 0.011 | 0.028 | 0.01       | 0.021         | 0.836         | 0.011 | 0.007      | 0.025 |
| UCFP079                  | 0.239   | 1.48          | CFP-BC         | 0.28  | 0.068 | 0.095 | 0.00       | 0.021         | 0.126         | 0.004 | 0.003      | 0.4   |
| UCFP080                  | 0.386   | 1.77          | TX-BC+EVG      | 0.008 | 0.009 | 0.012 | 0.40       | 0.008         | 0.012         | 0.012 | 0.006      | 0.53  |
| UCFP081                  | 0.239   | 1.48          | AdmFP          | 0.027 | 0.245 | 0.016 | 0.00       | 0.01          | 0.081         | 0.008 | 0.004      | 0.606 |
| UCFP082                  |         |               | Unknown        |       |       |       |            |               |               |       |            |       |
| UCFP083                  | 0.227   | 1.46          | SEM+AdmFP      | 0.023 | 0.015 | 0.012 | 0.00       | 0.038         | 0.642         | 0.008 | 0.232      | 0.025 |
| UCFP084                  | 0.167   | 1.33          | CFP-BC         | 0.073 | 0.46  | 0.089 | 0.00       | 0.055         | 0.099         | 0.004 | 0.008      | 0.209 |
| UCFP085                  | 0.239   | 1.48          | CFP-BC         | 0.018 | 0.019 | 0.012 | 0.01       | 0.564         | 0.072         | 0.004 | 0.005      | 0.301 |
| UCFP086                  |         |               | Unknown        |       |       |       |            |               |               |       |            |       |
| UCFP087                  | 0.341   | 1.68          | AdmFP          | 0.078 | 0.101 | 0.074 | 0.01       | 0.144         | 0.08          | 0.005 | 0.01       | 0.503 |
| UCFP088                  | 0.152   | 1.30          | CFP-BC         | 0.087 | 0.064 | 0.575 | 0.00       | 0.113         | 0.139         | 0.003 | 0.003      | 0.013 |
| UCFP089                  | 0.227   | 1.46          | CFP-BC         | 0.087 | 0.086 | 0.046 | 0.01       | 0.292         | 0.06          | 0.119 | 0.032      | 0.271 |
| UCFP090                  | 0.261   | 1.52          | CFP-BC         | 0.025 | 0.029 | 0.015 | 0.02       | 0.032         | 0.841         | 0.013 | 0.004      | 0.025 |
| UCFP091                  | 0.217   | 1.44          | AdmFP          | 0.012 | 0.033 | 0.019 | 0.01       | 0.014         | 0.769         | 0.119 | 0.004      | 0.018 |
| UCFP092                  | 0.295   | 1.59          | CFP-BC         | 0.099 | 0.034 | 0.027 | 0.01       | 0.036         | 0.212         | 0.524 | 0.006      | 0.057 |
| UCFP093                  | 0.174   | 1.35          | CFP-BC         | 0.115 | 0.278 | 0.058 | 0.00       | 0.037         | 0.409         | 0.007 | 0.008      | 0.084 |
| UCFP094                  | 0.300   | 1.60          | AdmFP+EVG      | 0.007 | 0.019 | 0.012 | 0.21       | 0.014         | 0.03          | 0.006 | 0.005      | 0.7   |
| UCFP095                  | 0.304   | 1.61          | SEM+AdmFP      | 0.012 | 0.351 | 0.13  | 0.01       | 0.03          | 0.011         | 0.014 | 0.434      | 0.013 |
| UCFP096                  | 0.289   | 1.58          | AdmFP+EVG      | 0.052 | 0.056 | 0.048 | 0.56       | 0.065         | 0.027         | 0.02  | 0.016      | 0.158 |
| UCFP097                  | 0.159   | 1.32          | CFP-BC         | 0.086 | 0.148 | 0.022 | 0.01       | 0.033         | 0.691         | 0.005 | 0.002      | 0.005 |
| UCFP098                  | 0.261   | 1.52          | AdmFP          | 0.016 | 0.045 | 0.025 | 0.01       | 0.059         | 0.02          | 0.26  | 0.007      | 0.557 |

**GENETIC DIVERSITY**

**STRUCTURE ANALYSIS (K=9)**

| Field ID & Genetic group | Avg Het | Avg # Alleles | Heritage Calls | CFP   | CFP   | CFP   | EVG +AdmFP | CFP-BC +AdmFP | CFP-BC +AdmFP | AdmFP | AdmFP +SEM | TX-BC |
|--------------------------|---------|---------------|----------------|-------|-------|-------|------------|---------------|---------------|-------|------------|-------|
|                          |         |               |                | 1     | 2     | 3     | 4          | 5             | 6             | 7     | 8          | 9     |
| UCFP099                  | 0.196   | 1.39          | AdmFP          | 0.124 | 0.009 | 0.049 | 0.02       | 0.008         | 0.072         | 0.009 | 0.005      | 0.706 |
| UCFP100                  | 0.139   | 1.28          | CFP-BC+SEM     | 0.01  | 0.009 | 0.016 | 0.01       | 0.916         | 0.012         | 0.01  | 0.01       | 0.012 |
| UCFP101                  | 0.190   | 1.38          | AdmFP          | 0.011 | 0.009 | 0.018 | 0.01       | 0.655         | 0.021         | 0.018 | 0.008      | 0.247 |
| UCFP102                  | 0.176   | 1.35          | AdmFP          | 0.036 | 0.197 | 0.07  | 0.00       | 0.027         | 0.149         | 0.01  | 0.01       | 0.496 |
| UCFP103                  | 0.269   | 1.54          | AdmFP          | 0.048 | 0.072 | 0.037 | 0.01       | 0.016         | 0.28          | 0.014 | 0.09       | 0.438 |
| UCFP104                  | 0.167   | 1.33          | TX-BC          | 0.027 | 0.034 | 0.023 | 0.01       | 0.02          | 0.024         | 0.839 | 0.005      | 0.02  |
| UCFP105                  |         |               | Unknown        |       |       |       |            |               |               |       |            |       |
| UCFP106                  | 0.095   | 1.19          | CFP-BC         | 0.079 | 0.03  | 0.532 | 0.01       | 0.102         | 0.217         | 0.003 | 0.006      | 0.026 |
| UCFP107                  | 0.158   | 1.32          | CFP-BC         | 0.156 | 0.228 | 0.118 | 0.01       | 0.034         | 0.01          | 0.437 | 0.005      | 0.006 |
| UCFP108                  |         |               | Unknown        |       |       |       |            |               |               |       |            |       |
| UCFP109                  |         |               | Unknown        |       |       |       |            |               |               |       |            |       |
| UCFP110                  |         |               | Unknown        |       |       |       |            |               |               |       |            |       |
| UCFP111                  | 0.176   | 1.35          | CFP-BC+SEM     | 0.017 | 0.025 | 0.078 | 0.01       | 0.592         | 0.047         | 0.007 | 0.027      | 0.2   |
| UCFP112                  | 0.147   | 1.29          | CFP-BC         | 0.095 | 0.318 | 0.04  | 0.01       | 0.234         | 0.123         | 0.039 | 0.115      | 0.029 |
| UCFP113                  |         |               | Unknown        |       |       |       |            |               |               |       |            |       |
| UCFP114                  | 0.067   | 1.13          | CFP            | 0.037 | 0.828 | 0.054 | 0.00       | 0.051         | 0.013         | 0.005 | 0.003      | 0.005 |
| UCFP115                  |         |               | Unknown        |       |       |       |            |               |               |       |            |       |
| UCFP116                  |         |               | Unknown        |       |       |       |            |               |               |       |            |       |
| UCFP117                  |         |               | Unknown        |       |       |       |            |               |               |       |            |       |
| UCFP118                  |         |               | Unknown        |       |       |       |            |               |               |       |            |       |
| UCFP119                  |         |               | Unknown        |       |       |       |            |               |               |       |            |       |
| UCFP120                  |         |               | Unknown        |       |       |       |            |               |               |       |            |       |
| UCFP121                  |         |               | Unknown        |       |       |       |            |               |               |       |            |       |
| UCFP122                  |         |               | Unknown        |       |       |       |            |               |               |       |            |       |
| UCFP123                  | 0.100   | 1.20          | AdmFP          | 0.067 | 0.021 | 0.045 | 0.00       | 0.012         | 0.66          | 0.18  | 0.004      | 0.008 |
| UCFP124                  |         |               | Unknown        |       |       |       |            |               |               |       |            |       |
| UCFP125                  |         |               | Unknown        |       |       |       |            |               |               |       |            |       |
| UCFP126                  |         |               | Unknown        |       |       |       |            |               |               |       |            |       |
| UCFP127                  |         |               | Unknown        |       |       |       |            |               |               |       |            |       |
| UCFP128                  |         |               | Unknown        |       |       |       |            |               |               |       |            |       |
| UCFP129                  |         |               | Unknown        |       |       |       |            |               |               |       |            |       |
| UCFP130                  |         |               | Unknown        |       |       |       |            |               |               |       |            |       |
| UCFP131                  |         |               | Unknown        |       |       |       |            |               |               |       |            |       |
| UCFP132                  |         |               | Unknown        |       |       |       |            |               |               |       |            |       |
| UCFP133                  |         |               | Unknown        |       |       |       |            |               |               |       |            |       |
| UCFP134                  |         |               | Unknown        |       |       |       |            |               |               |       |            |       |
| UCFP135                  |         |               | Unknown        |       |       |       |            |               |               |       |            |       |
| UCFP136                  |         |               | Unknown        |       |       |       |            |               |               |       |            |       |
| UCFP137                  |         |               | Unknown        |       |       |       |            |               |               |       |            |       |
| UCFP138                  |         |               | Unknown        |       |       |       |            |               |               |       |            |       |
| UCFP139                  |         |               | Unknown        |       |       |       |            |               |               |       |            |       |
| UCFP-LawEnfor            | 0.174   | 1.35          | TX-BC          |       |       |       |            |               |               |       |            |       |
| K002                     | 0.200   | 1.40          | CFP            | 0.782 | 0.025 | 0.163 | 0.00       | 0.009         | 0.008         | 0.003 | 0.002      | 0.004 |
| K003                     |         |               | CFP            |       |       |       |            |               |               |       |            |       |
| K004                     |         |               | CFP            |       |       |       |            |               |               |       |            |       |
| K005                     |         |               | CFP            |       |       |       |            |               |               |       |            |       |
| K006                     | 0.100   | 1.20          | CFP            | 0.561 | 0.067 | 0.307 | 0.00       | 0.039         | 0.014         | 0.004 | 0.002      | 0.004 |
| K007                     |         |               | CFP            |       |       |       |            |               |               |       |            |       |
| K008                     |         |               | CFP            |       |       |       |            |               |               |       |            |       |
| K010                     |         |               | CFP            |       |       |       |            |               |               |       |            |       |
| K011 or K009             |         |               | CFP            |       |       |       |            |               |               |       |            |       |
| K013                     | 0.143   | 1.29          | CFP            | 0.933 | 0.015 | 0.027 | 0.00       | 0.008         | 0.006         | 0.003 | 0.002      | 0.003 |
| K014                     |         |               | EVG            |       |       |       |            |               |               |       |            |       |
| K015                     |         |               | EVG            |       |       |       |            |               |               |       |            |       |
| K017                     | 0.143   | 1.29          | CFP            | 0.592 | 0.026 | 0.119 | 0.00       | 0.24          | 0.009         | 0.004 | 0.004      | 0.004 |
| K020                     |         |               | CFP            |       |       |       |            |               |               |       |            |       |
| K021                     |         |               | CFP            |       |       |       |            |               |               |       |            |       |
| K022                     |         |               | CFP            |       |       |       |            |               |               |       |            |       |

**GENETIC DIVERSITY**

**STRUCTURE ANALYSIS (K=9)**

| Field ID & Genetic group | Avg Het | Avg # Alleles | Heritage Calls | CFP   | CFP   | CFP   | EVG +AdmFP | CFP-BC +AdmFP | CFP-BC +AdmFP | AdmFP | AdmFP +SEM | TX-BC |
|--------------------------|---------|---------------|----------------|-------|-------|-------|------------|---------------|---------------|-------|------------|-------|
|                          |         |               |                | 1     | 2     | 3     | 4          | 5             | 6             | 7     | 8          | 9     |
| K023F1                   |         |               | CFP-F1         |       |       |       |            |               |               |       |            |       |
| K024                     |         |               | CFP            |       |       |       |            |               |               |       |            |       |
| K025                     |         |               | CFP            |       |       |       |            |               |               |       |            |       |
| K026                     |         |               | CFP            |       |       |       |            |               |               |       |            |       |
| K027                     |         |               | CFP            |       |       |       |            |               |               |       |            |       |
| K028                     |         |               | CFP            |       |       |       |            |               |               |       |            |       |
| K029                     |         |               | CFP            |       |       |       |            |               |               |       |            |       |
| K030                     |         |               | CFP            |       |       |       |            |               |               |       |            |       |
| K034F1                   |         |               | EVG-F1         |       |       |       |            |               |               |       |            |       |
| K037                     | 0.147   | 1.29          | CFP            | 0.609 | 0.139 | 0.179 | 0.01       | 0.029         | 0.022         | 0.005 | 0.003      | 0.006 |
| K040                     |         |               | CFP            |       |       |       |            |               |               |       |            |       |
| K041                     |         |               | CFP            |       |       |       |            |               |               |       |            |       |
| K043                     |         |               | CFP            |       |       |       |            |               |               |       |            |       |
| K044                     |         |               | EVG x Unk      |       |       |       |            |               |               |       |            |       |
| K046F1                   |         |               | EVG-F1         |       |       |       |            |               |               |       |            |       |
| K047F1                   |         |               | CFP-F1         |       |       |       |            |               |               |       |            |       |
| K049                     | 0.341   | 1.68          | EVG-BC         | 0.013 | 0.015 | 0.013 | 0.62       | 0.011         | 0.065         | 0.006 | 0.004      | 0.256 |
| K050                     |         |               | EVG-BC         |       |       |       |            |               |               |       |            |       |
| K051                     |         |               | CFP            |       |       |       |            |               |               |       |            |       |
| K052                     |         |               | CFP-BC         |       |       |       |            |               |               |       |            |       |
| K053                     |         |               | CFP-BC         |       |       |       |            |               |               |       |            |       |
| K054                     |         |               | CFP-BC         |       |       |       |            |               |               |       |            |       |
| K055                     |         |               | CFPxUnk        |       |       |       |            |               |               |       |            |       |
| K056                     |         |               | TX-BC          |       |       |       |            |               |               |       |            |       |
| K057                     |         |               | TX-BC          |       |       |       |            |               |               |       |            |       |
| K061                     |         |               | EVG-BC         |       |       |       |            |               |               |       |            |       |
| K062F1                   | 0.318   | 1.64          | CFP-F1         | 0.018 | 0.048 | 0.027 | 0.02       | 0.013         | 0.207         | 0.543 | 0.007      | 0.123 |
| K069                     | 0.289   | 1.58          | TX-BC          | 0.014 | 0.044 | 0.029 | 0.00       | 0.012         | 0.027         | 0.016 | 0.003      | 0.852 |
| K070                     | 0.250   | 1.50          | TX-BC          | 0.004 | 0.006 | 0.005 | 0.00       | 0.005         | 0.007         | 0.006 | 0.004      | 0.96  |
| K071                     | 0.238   | 1.48          | CFP            | 0.557 | 0.248 | 0.154 | 0.00       | 0.015         | 0.009         | 0.007 | 0.002      | 0.004 |
| K072                     | 0.200   | 1.40          | CFP            | 0.164 | 0.597 | 0.192 | 0.00       | 0.022         | 0.011         | 0.004 | 0.002      | 0.004 |
| K073                     | 0.114   | 1.23          | CFP            | 0.431 | 0.154 | 0.333 | 0.00       | 0.026         | 0.016         | 0.022 | 0.005      | 0.009 |
| K074                     | 0.262   | 1.52          | CFP            | 0.097 | 0.014 | 0.85  | 0.00       | 0.018         | 0.008         | 0.004 | 0.003      | 0.003 |
| K075                     | 0.250   | 1.50          | CFP            | 0.051 | 0.073 | 0.838 | 0.00       | 0.018         | 0.007         | 0.003 | 0.003      | 0.004 |
| K076                     | 0.190   | 1.38          | CFP-BC         | 0.012 | 0.056 | 0.013 | 0.00       | 0.025         | 0.877         | 0.005 | 0.004      | 0.008 |
| K077                     | 0.159   | 1.32          | CFP-BC         | 0.115 | 0.266 | 0.215 | 0.00       | 0.091         | 0.043         | 0.008 | 0.121      | 0.136 |
| K078                     | 0.167   | 1.33          | CFP-BC         | 0.021 | 0.086 | 0.017 | 0.02       | 0.01          | 0.73          | 0.01  | 0.003      | 0.108 |
| K081                     | 0.175   | 1.35          | CFP-BC         | 0.188 | 0.065 | 0.207 | 0.01       | 0.221         | 0.015         | 0.006 | 0.009      | 0.281 |
| K083                     | 0.200   | 1.40          | CFP-BC         | 0.135 | 0.055 | 0.17  | 0.01       | 0.327         | 0.013         | 0.007 | 0.005      | 0.277 |
| K084                     | 0.167   | 1.33          | CFP            | 0.456 | 0.404 | 0.07  | 0.00       | 0.044         | 0.008         | 0.009 | 0.002      | 0.003 |
| K085                     | 0.182   | 1.36          | CFP            | 0.451 | 0.414 | 0.053 | 0.00       | 0.057         | 0.011         | 0.005 | 0.003      | 0.004 |
| K087                     | 0.341   | 1.68          | CFP-BC         | 0.048 | 0.076 | 0.085 | 0.01       | 0.022         | 0.742         | 0.004 | 0.005      | 0.005 |
| K088                     | 0.295   | 1.59          | CFP-BC         | 0.026 | 0.065 | 0.051 | 0.00       | 0.051         | 0.79          | 0.004 | 0.003      | 0.005 |
| K091                     | 0.273   | 1.55          | TX-BC+EVG      | 0.009 | 0.008 | 0.01  | 0.48       | 0.011         | 0.016         | 0.004 | 0.003      | 0.461 |
| K092                     | 0.211   | 1.42          | TX-BC          | 0.15  | 0.03  | 0.023 | 0.00       | 0.07          | 0.017         | 0.693 | 0.008      | 0.005 |
| K094                     | 0.261   | 1.52          | TX-BC          | 0.004 | 0.005 | 0.004 | 0.00       | 0.006         | 0.008         | 0.009 | 0.01       | 0.95  |
| K095                     |         |               | AdmFP          |       |       |       |            |               |               |       |            |       |
| K096                     |         |               | AdmFP          |       |       |       |            |               |               |       |            |       |
| K097                     |         |               | AdmFP          |       |       |       |            |               |               |       |            |       |
| K099                     | 0.235   | 1.47          | CFP-BC+EVG     | 0.699 | 0.028 | 0.092 | 0.01       | 0.035         | 0.016         | 0.095 | 0.008      | 0.017 |
| K100                     | 0.273   | 1.55          | CFP-BC+EVG     | 0.404 | 0.031 | 0.103 | 0.29       | 0.046         | 0.045         | 0.044 | 0.014      | 0.024 |
| K101                     | 0.239   | 1.48          | CFP-BC+EVG     | 0.394 | 0.025 | 0.099 | 0.32       | 0.059         | 0.009         | 0.062 | 0.027      | 0.01  |
| K102                     | 0.152   | 1.30          | CFP            | 0.928 | 0.014 | 0.027 | 0.00       | 0.011         | 0.008         | 0.003 | 0.002      | 0.003 |
| K103                     | 0.053   | 1.11          | CFP            | 0.8   | 0.059 | 0.091 | 0.00       | 0.012         | 0.023         | 0.004 | 0.003      | 0.005 |
| K104                     | 0.344   | 1.69          | EVG-BC         | 0.022 | 0.028 | 0.022 | 0.38       | 0.015         | 0.307         | 0.021 | 0.013      | 0.19  |
| K105                     | 0.147   | 1.29          | TX-BC+EVG      | 0.006 | 0.006 | 0.007 | 0.34       | 0.005         | 0.034         | 0.003 | 0.006      | 0.597 |
| K106                     | 0.227   | 1.46          | TX-BC+EVG      | 0.005 | 0.005 | 0.005 | 0.33       | 0.007         | 0.01          | 0.004 | 0.004      | 0.629 |
| K107                     | 0.227   | 1.46          | CFP-BC+EVG     | 0.064 | 0.068 | 0.515 | 0.23       | 0.03          | 0.022         | 0.03  | 0.01       | 0.028 |



**GENETIC DIVERSITY**

**STRUCTURE ANALYSIS (K=9)**

| Field ID & Genetic group | Avg Het | Avg # Alleles | Heritage Calls | CFP   | CFP   | CFP   | EVG +AdmFP | CFP-BC +AdmFP | CFP-BC +AdmFP | AdmFP | AdmFP +SEM | TX-BC |
|--------------------------|---------|---------------|----------------|-------|-------|-------|------------|---------------|---------------|-------|------------|-------|
|                          |         |               |                | 1     | 2     | 3     | 4          | 5             | 6             | 7     | 8          | 9     |
| K108                     | 0.350   | 1.70          | CFP-BC         | 0.073 | 0.43  | 0.07  | 0.02       | 0.039         | 0.023         | 0.024 | 0.111      | 0.205 |
| K109                     | 0.227   | 1.46          | CFP-BC+SEM     | 0.059 | 0.028 | 0.765 | 0.01       | 0.049         | 0.063         | 0.003 | 0.006      | 0.018 |
| K110                     | 0.261   | 1.52          | CFP-BC+SEM     | 0.354 | 0.051 | 0.172 | 0.01       | 0.017         | 0.02          | 0.004 | 0.006      | 0.369 |
| K111                     | 0.217   | 1.44          | CFP-BC+SEM     | 0.155 | 0.027 | 0.203 | 0.01       | 0.008         | 0.193         | 0.003 | 0.025      | 0.378 |
| K112                     | 0.238   | 1.48          | EVG-BC         | 0.013 | 0.015 | 0.017 | 0.84       | 0.017         | 0.076         | 0.008 | 0.008      | 0.011 |
| K114                     | 0.289   | 1.58          | TX-BC          | 0.007 | 0.006 | 0.008 | 0.00       | 0.005         | 0.007         | 0.006 | 0.004      | 0.953 |
| K116                     | 0.367   | 1.73          | TX-BC          | 0.008 | 0.012 | 0.009 | 0.01       | 0.008         | 0.007         | 0.011 | 0.007      | 0.933 |
| K117                     | 0.071   | 1.14          | CFP            | 0.699 | 0.174 | 0.037 | 0.00       | 0.072         | 0.006         | 0.003 | 0.002      | 0.003 |
| K118                     | 0.095   | 1.19          | CFP            | 0.889 | 0.029 | 0.031 | 0.00       | 0.033         | 0.006         | 0.003 | 0.002      | 0.003 |
| K121                     | 0.214   | 1.43          | CFP-BC         | 0.051 | 0.134 | 0.379 | 0.02       | 0.318         | 0.027         | 0.007 | 0.044      | 0.026 |
| K122                     |         |               | CFP-BC         |       |       |       |            |               |               |       |            |       |
| K123                     | 0.227   | 1.46          | CFP-BC         | 0.104 | 0.217 | 0.065 | 0.01       | 0.223         | 0.009         | 0.359 | 0.005      | 0.012 |
| K124                     | 0.114   | 1.23          | CFP            | 0.666 | 0.256 | 0.03  | 0.00       | 0.022         | 0.013         | 0.003 | 0.003      | 0.003 |
| K125                     | 0.079   | 1.16          | CFP            | 0.118 | 0.642 | 0.194 | 0.00       | 0.015         | 0.016         | 0.004 | 0.002      | 0.005 |
| K126                     | 0.136   | 1.27          | CFP            | 0.681 | 0.171 | 0.101 | 0.00       | 0.022         | 0.01          | 0.006 | 0.002      | 0.004 |
| K127                     | 0.261   | 1.52          | EVG-BC         | 0.021 | 0.018 | 0.02  | 0.51       | 0.01          | 0.043         | 0.008 | 0.007      | 0.368 |
| K128                     | 0.152   | 1.30          | CFP            | 0.327 | 0.342 | 0.298 | 0.00       | 0.011         | 0.011         | 0.003 | 0.002      | 0.003 |
| K130                     | 0.119   | 1.24          | CFP            | 0.236 | 0.427 | 0.199 | 0.00       | 0.108         | 0.015         | 0.004 | 0.003      | 0.005 |
| K131                     | 0.175   | 1.35          | CFP            | 0.166 | 0.645 | 0.108 | 0.00       | 0.055         | 0.012         | 0.004 | 0.003      | 0.004 |
| K133                     | 0.167   | 1.33          | CFP            | 0.142 | 0.689 | 0.117 | 0.00       | 0.03          | 0.007         | 0.004 | 0.003      | 0.004 |
| K134                     | 0.125   | 1.25          | CFP            | 0.448 | 0.242 | 0.263 | 0.01       | 0.013         | 0.02          | 0.003 | 0.003      | 0.004 |
| K135                     | 0.109   | 1.22          | CFP-BC         | 0.406 | 0.1   | 0.187 | 0.00       | 0.278         | 0.017         | 0.004 | 0.002      | 0.004 |
| K136                     | 0.091   | 1.18          | CFP-BC         | 0.869 | 0.011 | 0.016 | 0.00       | 0.087         | 0.007         | 0.003 | 0.002      | 0.003 |
| K137                     | 0.239   | 1.48          | TX-BC+EVG      | 0.006 | 0.013 | 0.011 | 0.31       | 0.012         | 0.011         | 0.004 | 0.004      | 0.63  |
| K138                     | 0.200   | 1.40          | TX-BC+EVG      | 0.008 | 0.009 | 0.01  | 0.42       | 0.016         | 0.009         | 0.025 | 0.014      | 0.49  |
| K139                     | 0.409   | 1.82          | AdmFP+EVG      | 0.009 | 0.013 | 0.008 | 0.43       | 0.01          | 0.021         | 0.013 | 0.178      | 0.322 |
| K140                     | 0.457   | 1.91          | AdmFP+EVG      | 0.009 | 0.005 | 0.008 | 0.33       | 0.01          | 0.016         | 0.006 | 0.159      | 0.459 |
| K141                     |         |               | AdmFP+EVG      |       |       |       |            |               |               |       |            |       |
| K142                     | 0.409   | 1.82          | AdmFP+EVG      | 0.007 | 0.007 | 0.005 | 0.44       | 0.007         | 0.014         | 0.009 | 0.011      | 0.505 |
| K143                     | 0.250   | 1.50          | TX-BC+EVG      | 0.028 | 0.02  | 0.039 | 0.18       | 0.006         | 0.054         | 0.006 | 0.003      | 0.661 |
| K144                     | 0.250   | 1.50          | TX-BC+EVG      | 0.016 | 0.01  | 0.012 | 0.23       | 0.004         | 0.021         | 0.007 | 0.003      | 0.696 |
| K145                     |         |               | TX-BC+EVG      |       |       |       |            |               |               |       |            |       |
| K146                     | 0.261   | 1.52          | CFP-BC         | 0.048 | 0.086 | 0.153 | 0.00       | 0.031         | 0.655         | 0.003 | 0.003      | 0.017 |
| K148                     | 0.239   | 1.48          | CFP-BC         | 0.021 | 0.066 | 0.06  | 0.00       | 0.029         | 0.797         | 0.005 | 0.004      | 0.013 |
| K149                     | 0.190   | 1.38          | CFP-BC+EVG     | 0.247 | 0.213 | 0.057 | 0.19       | 0.146         | 0.101         | 0.019 | 0.008      | 0.019 |
| K151                     | 0.308   | 1.62          | CFP-BC+EVG     | 0.063 | 0.459 | 0.049 | 0.01       | 0.085         | 0.215         | 0.022 | 0.022      | 0.079 |
| K153                     | 0.368   | 1.74          | CFP-BC         | 0.02  | 0.121 | 0.036 | 0.01       | 0.066         | 0.027         | 0.011 | 0.009      | 0.704 |
| K154                     | 0.283   | 1.57          | CFP-BC         | 0.052 | 0.064 | 0.084 | 0.00       | 0.103         | 0.036         | 0.006 | 0.004      | 0.649 |
| K155                     | 0.196   | 1.39          | TX-BC          | 0.015 | 0.02  | 0.019 | 0.00       | 0.01          | 0.018         | 0.003 | 0.003      | 0.907 |
| K156                     | 0.167   | 1.33          | TX-BC          | 0.01  | 0.012 | 0.012 | 0.00       | 0.01          | 0.015         | 0.007 | 0.003      | 0.927 |
| K157                     | 0.119   | 1.24          | CFP-BC         | 0.773 | 0.023 | 0.063 | 0.01       | 0.011         | 0.107         | 0.003 | 0.002      | 0.012 |
| K158                     | 0.152   | 1.30          | CFP-BC         | 0.22  | 0.089 | 0.07  | 0.00       | 0.029         | 0.571         | 0.003 | 0.003      | 0.011 |
| K159                     | 0.182   | 1.36          | CFP-BC         | 0.496 | 0.043 | 0.071 | 0.00       | 0.067         | 0.116         | 0.004 | 0.003      | 0.197 |
| K160                     | 0.239   | 1.48          | CFP-BC         | 0.154 | 0.01  | 0.019 | 0.00       | 0.017         | 0.777         | 0.009 | 0.004      | 0.006 |
| K161                     | 0.042   | 1.08          | CFP-BC         | 0.139 | 0.025 | 0.041 | 0.01       | 0.048         | 0.709         | 0.006 | 0.007      | 0.014 |
| K162                     | 0.176   | 1.35          | CFP-BC         | 0.193 | 0.029 | 0.073 | 0.01       | 0.035         | 0.596         | 0.018 | 0.01       | 0.038 |
| K163                     | 0.152   | 1.30          | CFP-BC+SEM     | 0.016 | 0.007 | 0.008 | 0.00       | 0.944         | 0.008         | 0.006 | 0.003      | 0.004 |
| K164                     | 0.174   | 1.35          | CFP-BC+SEM     | 0.029 | 0.009 | 0.011 | 0.00       | 0.925         | 0.009         | 0.007 | 0.004      | 0.004 |
| K165                     | 0.182   | 1.36          | CFP-BC+SEM     | 0.061 | 0.038 | 0.029 | 0.01       | 0.785         | 0.017         | 0.02  | 0.003      | 0.042 |
| K166                     | 0.205   | 1.41          | CFP-BC+SEM     | 0.02  | 0.032 | 0.028 | 0.00       | 0.893         | 0.008         | 0.008 | 0.003      | 0.005 |
| K167                     | 0.273   | 1.55          | TX-BC          | 0.006 | 0.008 | 0.007 | 0.00       | 0.009         | 0.01          | 0.006 | 0.005      | 0.945 |
| K168                     | 0.250   | 1.50          | TX-BC          | 0.005 | 0.006 | 0.006 | 0.00       | 0.006         | 0.011         | 0.006 | 0.005      | 0.953 |
| K170                     | 0.239   | 1.48          | TX-BC+EVG      | 0.008 | 0.006 | 0.009 | 0.25       | 0.01          | 0.01          | 0.005 | 0.004      | 0.694 |
| K171                     | 0.196   | 1.39          | TX-BC+EVG      | 0.011 | 0.017 | 0.017 | 0.35       | 0.017         | 0.015         | 0.004 | 0.003      | 0.565 |
| K172                     | 0.152   | 1.30          | TX-BC+EVG      | 0.004 | 0.005 | 0.005 | 0.29       | 0.004         | 0.004         | 0.006 | 0.004      | 0.681 |
| K173                     | 0.300   | 1.60          | AdmFP+SEM      |       |       |       |            |               |               |       |            |       |
| K174                     | 0.196   | 1.39          | CFP-BC+EVG     | 0.258 | 0.118 | 0.114 | 0.11       | 0.077         | 0.147         | 0.019 | 0.031      | 0.127 |
| K175                     | 0.300   | 1.60          | CFP-BC+EVG+SEM | 0.199 | 0.233 | 0.083 | 0.11       | 0.125         | 0.037         | 0.111 | 0.048      | 0.052 |

**GENETIC DIVERSITY**

**STRUCTURE ANALYSIS (K=9)**

| Field ID & Genetic group | Avg Het | Avg # Alleles | Heritage Calls | CFP   | CFP   | CFP   | EVG +AdmFP | CFP-BC +AdmFP | CFP-BC +AdmFP | AdmFP | AdmFP +SEM | TX-BC |
|--------------------------|---------|---------------|----------------|-------|-------|-------|------------|---------------|---------------|-------|------------|-------|
|                          |         |               |                | 1     | 2     | 3     | 4          | 5             | 6             | 7     | 8          | 9     |
| K176                     | 0.269   | 1.54          | CFP-BC+EVG+SEM | 0.033 | 0.086 | 0.069 | 0.18       | 0.025         | 0.219         | 0.039 | 0.037      | 0.316 |
| K177                     | 0.136   | 1.27          | CFP-BC+EVG+SEM | 0.122 | 0.187 | 0.464 | 0.14       | 0.029         | 0.023         | 0.006 | 0.006      | 0.022 |
| K178                     | 0.136   | 1.27          | CFP-BC         | 0.28  | 0.09  | 0.114 | 0.01       | 0.016         | 0.469         | 0.004 | 0.005      | 0.017 |
| K179                     | 0.225   | 1.45          | CFP-BC         | 0.064 | 0.052 | 0.054 | 0.01       | 0.023         | 0.782         | 0.004 | 0.004      | 0.006 |
| K180                     | 0.130   | 1.26          | CFP-BC         | 0.316 | 0.249 | 0.064 | 0.00       | 0.347         | 0.01          | 0.003 | 0.002      | 0.003 |
| K181                     |         |               | CFP-BC         |       |       |       |            |               |               |       |            |       |
| K182                     | 0.179   | 1.36          | CFP-BC         | 0.022 | 0.153 | 0.039 | 0.01       | 0.06          | 0.607         | 0.007 | 0.014      | 0.085 |
| K183                     | 0.100   | 1.20          | AdmFP+SEM      | 0.038 | 0.075 | 0.043 | 0.03       | 0.118         | 0.093         | 0.006 | 0.008      | 0.591 |
| K185                     |         |               | CFPxUnk        |       |       |       |            |               |               |       |            |       |
| K186                     |         |               | CFPxUnk        |       |       |       |            |               |               |       |            |       |
| K187                     | 0.125   | 1.25          | CFP            | 0.027 | 0.931 | 0.015 | 0.00       | 0.009         | 0.006         | 0.003 | 0.002      | 0.003 |
| K188                     | 0.114   | 1.23          | CFP            | 0.341 | 0.499 | 0.122 | 0.00       | 0.012         | 0.011         | 0.006 | 0.002      | 0.003 |
| K189                     | 0.159   | 1.32          | CFP            | 0.309 | 0.538 | 0.111 | 0.00       | 0.015         | 0.01          | 0.008 | 0.003      | 0.005 |
| K190                     | 0.217   | 1.44          | CFP-BC         | 0.078 | 0.592 | 0.214 | 0.00       | 0.027         | 0.051         | 0.003 | 0.017      | 0.015 |
| K191                     | 0.227   | 1.46          | CFP-BC         | 0.051 | 0.628 | 0.222 | 0.02       | 0.029         | 0.014         | 0.004 | 0.014      | 0.017 |
| K192                     | 0.227   | 1.46          | CFP-BC         | 0.034 | 0.184 | 0.368 | 0.01       | 0.009         | 0.374         | 0.003 | 0.003      | 0.015 |
| K193                     |         |               | CFP-BC         |       |       |       |            |               |               |       |            |       |
| K194                     | 0.190   | 1.38          | CFP-BC         | 0.147 | 0.374 | 0.306 | 0.01       | 0.013         | 0.118         | 0.003 | 0.006      | 0.018 |
| K195                     |         |               | CFP-BC         |       |       |       |            |               |               |       |            |       |
| K196                     | 0.217   | 1.44          | TX-BC          | 0.005 | 0.004 | 0.004 | 0.00       | 0.004         | 0.968         | 0.003 | 0.003      | 0.006 |
| K197                     | 0.211   | 1.42          | AdmFP          | 0.012 | 0.018 | 0.013 | 0.00       | 0.009         | 0.925         | 0.004 | 0.003      | 0.012 |
| K198                     | 0.205   | 1.41          | AdmFP          | 0.076 | 0.067 | 0.018 | 0.00       | 0.022         | 0.799         | 0.004 | 0.003      | 0.007 |
| K199                     | 0.239   | 1.48          | AdmFP          | 0.024 | 0.02  | 0.02  | 0.00       | 0.011         | 0.908         | 0.004 | 0.002      | 0.006 |
| K200                     | 0.174   | 1.35          | CFP-BC         | 0.056 | 0.067 | 0.009 | 0.05       | 0.749         | 0.025         | 0.024 | 0.006      | 0.017 |
| K201                     | 0.130   | 1.26          | CFP-BC         | 0.037 | 0.025 | 0.028 | 0.00       | 0.891         | 0.008         | 0.003 | 0.002      | 0.003 |
| K202                     | 0.176   | 1.35          | CFP-BC+SEM     | 0.09  | 0.109 | 0.259 | 0.01       | 0.25          | 0.01          | 0.109 | 0.154      | 0.008 |
| K203                     |         |               | CFP-BC+SEM     |       |       |       |            |               |               |       |            |       |
| K204                     | 0.062   | 1.13          | CFP-BC+SEM     | 0.362 | 0.085 | 0.471 | 0.01       | 0.041         | 0.009         | 0.008 | 0.009      | 0.008 |
| K205                     | 0.310   | 1.62          | EVG-BC         | 0.012 | 0.017 | 0.033 | 0.57       | 0.215         | 0.018         | 0.06  | 0.016      | 0.055 |
| K206                     | 0.283   | 1.57          | EVG-BC         | 0.031 | 0.02  | 0.026 | 0.43       | 0.133         | 0.018         | 0.025 | 0.012      | 0.308 |
| K207                     | 0.375   | 1.75          | EVG-BC         | 0.015 | 0.014 | 0.04  | 0.54       | 0.057         | 0.013         | 0.025 | 0.031      | 0.262 |
| K208                     | 0.182   | 1.36          | AdmFP          | 0.169 | 0.023 | 0.033 | 0.02       | 0.125         | 0.163         | 0.04  | 0.012      | 0.42  |
| K209                     | 0.318   | 1.64          | AdmFP          | 0.115 | 0.032 | 0.038 | 0.06       | 0.06          | 0.091         | 0.276 | 0.011      | 0.32  |
| K210                     | 0.333   | 1.67          | EVG-BC         | 0.043 | 0.062 | 0.04  | 0.37       | 0.035         | 0.1           | 0.013 | 0.003      | 0.334 |
| K211                     |         |               | AdmFP+SEM      |       |       |       |            |               |               |       |            |       |
| K212                     | 0.250   | 1.50          | AdmFP+SEM      | 0.025 | 0.071 | 0.02  | 0.01       | 0.141         | 0.023         | 0.263 | 0.019      | 0.433 |
| K213                     | 0.250   | 1.50          | AdmFP+SEM      | 0.043 | 0.054 | 0.052 | 0.01       | 0.084         | 0.012         | 0.109 | 0.028      | 0.612 |
| K214                     | 0.348   | 1.70          | EVG-BC         | 0.012 | 0.011 | 0.013 | 0.55       | 0.024         | 0.109         | 0.012 | 0.145      | 0.128 |
| K215                     |         |               | EVG-BC         |       |       |       |            |               |               |       |            |       |
| K216                     | 0.325   | 1.65          | EVG-BC         | 0.107 | 0.062 | 0.096 | 0.24       | 0.04          | 0.116         | 0.009 | 0.024      | 0.308 |
| K217                     | 0.273   | 1.55          | EVG-BC+SEM     | 0.04  | 0.064 | 0.029 | 0.58       | 0.221         | 0.01          | 0.018 | 0.02       | 0.024 |
| K218                     | 0.350   | 1.70          | EVG-BC+SEM     | 0.033 | 0.075 | 0.038 | 0.49       | 0.244         | 0.014         | 0.024 | 0.025      | 0.056 |
| K219                     | 0.273   | 1.55          | AdmFP+SEM      | 0.01  | 0.012 | 0.011 | 0.01       | 0.363         | 0.038         | 0.011 | 0.014      | 0.537 |
| K220                     | 0.250   | 1.50          | AdmFP+SEM      | 0.022 | 0.038 | 0.037 | 0.01       | 0.165         | 0.054         | 0.007 | 0.014      | 0.659 |
| K221                     | 0.200   | 1.40          | AdmFP+SEM      | 0.051 | 0.028 | 0.106 | 0.01       | 0.111         | 0.378         | 0.266 | 0.039      | 0.011 |
| K222                     | 0.295   | 1.59          | AdmFP+SEM      | 0.025 | 0.012 | 0.026 | 0.01       | 0.008         | 0.422         | 0.463 | 0.012      | 0.021 |
| K223                     | 0.217   | 1.44          | AdmFP+SEM      | 0.034 | 0.01  | 0.017 | 0.01       | 0.031         | 0.601         | 0.278 | 0.009      | 0.009 |
| K224                     |         |               | AdmFP          |       |       |       |            |               |               |       |            |       |
| K225                     |         |               | AdmFP          |       |       |       |            |               |               |       |            |       |
| K226                     | 0.217   | 1.44          | AdmFP          | 0.123 | 0.032 | 0.038 | 0.00       | 0.098         | 0.033         | 0.008 | 0.005      | 0.661 |
| K228                     | 0.283   | 1.57          | AdmFP          | 0.097 | 0.047 | 0.048 | 0.00       | 0.019         | 0.137         | 0.011 | 0.004      | 0.635 |
| K229                     | 0.196   | 1.39          | AdmFP+SEM      | 0.033 | 0.028 | 0.028 | 0.00       | 0.012         | 0.872         | 0.004 | 0.015      | 0.006 |
| K230                     | 0.261   | 1.52          | AdmFP          | 0.146 | 0.022 | 0.036 | 0.00       | 0.102         | 0.678         | 0.004 | 0.003      | 0.005 |
| K231                     |         |               | AdmFP+SEM      |       |       |       |            |               |               |       |            |       |
| K232                     |         |               | AdmFP+SEM      |       |       |       |            |               |               |       |            |       |
| K233                     | 0.239   | 1.48          | CFP-BC         | 0.332 | 0.015 | 0.096 | 0.01       | 0.025         | 0.062         | 0.004 | 0.004      | 0.456 |
| K234                     | 0.261   | 1.52          | CFP-BC         | 0.399 | 0.019 | 0.082 | 0.01       | 0.092         | 0.07          | 0.008 | 0.005      | 0.318 |
| K236                     | 0.262   | 1.52          | TX-BC+EVG      | 0.007 | 0.008 | 0.008 | 0.24       | 0.009         | 0.009         | 0.004 | 0.005      | 0.711 |

**GENETIC DIVERSITY**

**STRUCTURE ANALYSIS (K=9)**

| Field ID & Genetic group | Avg Het | Avg # Alleles | Heritage Calls | CFP   | CFP   | CFP   | EVG +AdmFP | CFP-BC +AdmFP | CFP-BC +AdmFP | AdmFP | AdmFP +SEM | TX-BC |
|--------------------------|---------|---------------|----------------|-------|-------|-------|------------|---------------|---------------|-------|------------|-------|
|                          |         |               |                | 1     | 2     | 3     | 4          | 5             | 6             | 7     | 8          | 9     |
| K237                     | 0.238   | 1.48          | CFP-BC         | 0.047 | 0.042 | 0.066 | 0.01       | 0.415         | 0.089         | 0.006 | 0.019      | 0.309 |
| K238                     | 0.304   | 1.61          | TX-BC+EVG      | 0.005 | 0.006 | 0.005 | 0.17       | 0.005         | 0.006         | 0.005 | 0.004      | 0.797 |
| K239                     | 0.205   | 1.41          | AdmFP          | 0.044 | 0.028 | 0.028 | 0.02       | 0.083         | 0.011         | 0.769 | 0.004      | 0.011 |
| K240                     | 0.217   | 1.44          | AdmFP          | 0.02  | 0.065 | 0.029 | 0.00       | 0.093         | 0.009         | 0.768 | 0.003      | 0.008 |
| K241                     | 0.239   | 1.48          | AdmFP          | 0.037 | 0.026 | 0.024 | 0.00       | 0.018         | 0.061         | 0.005 | 0.003      | 0.823 |
| K242                     | 0.261   | 1.52          | AdmFP          | 0.113 | 0.104 | 0.046 | 0.00       | 0.013         | 0.042         | 0.008 | 0.003      | 0.668 |
| K243                     | 0.261   | 1.52          | AdmFP          | 0.087 | 0.062 | 0.03  | 0.00       | 0.011         | 0.068         | 0.005 | 0.003      | 0.731 |
| K244                     | 0.239   | 1.48          | CFP-BC+EVG     | 0.29  | 0.059 | 0.074 | 0.22       | 0.049         | 0.03          | 0.005 | 0.003      | 0.271 |
| K245                     | 0.227   | 1.46          | CFP-BC+EVG     | 0.132 | 0.172 | 0.091 | 0.23       | 0.041         | 0.256         | 0.014 | 0.011      | 0.054 |
| K246                     | 0.261   | 1.52          | CFP-BC+EVG     | 0.281 | 0.071 | 0.036 | 0.22       | 0.027         | 0.047         | 0.02  | 0.01       | 0.294 |
| K247                     | 0.119   | 1.24          | CFP-BC         | 0.03  | 0.015 | 0.015 | 0.00       | 0.923         | 0.006         | 0.003 | 0.003      | 0.003 |
| K248                     | 0.152   | 1.30          | CFP-BC         | 0.012 | 0.006 | 0.007 | 0.00       | 0.953         | 0.007         | 0.005 | 0.005      | 0.003 |
| K249                     | 0.119   | 1.24          | CFP-BC         | 0.096 | 0.018 | 0.015 | 0.00       | 0.838         | 0.014         | 0.006 | 0.003      | 0.006 |
| K250                     | 0.217   | 1.44          | CFP-BC         | 0.04  | 0.039 | 0.029 | 0.01       | 0.684         | 0.011         | 0.011 | 0.162      | 0.017 |
| K251                     | 0.205   | 1.41          | CFP-BC         | 0.161 | 0.152 | 0.163 | 0.01       | 0.118         | 0.084         | 0.005 | 0.122      | 0.188 |
| K252                     | 0.174   | 1.35          | CFP-BC         | 0.079 | 0.037 | 0.035 | 0.01       | 0.687         | 0.02          | 0.005 | 0.102      | 0.028 |
| K253                     | 0.200   | 1.40          | AdmFP+SEM      | 0.008 | 0.026 | 0.015 | 0.01       | 0.256         | 0.012         | 0.017 | 0.011      | 0.65  |
| K255                     | 0.158   | 1.32          | AdmFP+SEM      | 0.031 | 0.398 | 0.021 | 0.00       | 0.033         | 0.176         | 0.044 | 0.004      | 0.288 |
| K256                     | 0.275   | 1.55          | AdmFP+SEM      | 0.045 | 0.545 | 0.028 | 0.00       | 0.02          | 0.016         | 0.042 | 0.005      | 0.295 |
| K257                     | 0.211   | 1.42          | AdmFP          | 0.118 | 0.02  | 0.032 | 0.00       | 0.015         | 0.798         | 0.004 | 0.004      | 0.007 |
| K258                     | 0.184   | 1.37          | AdmFP          | 0.015 | 0.013 | 0.01  | 0.00       | 0.007         | 0.931         | 0.004 | 0.003      | 0.012 |
| K259                     | 0.206   | 1.41          | AdmFP          | 0.024 | 0.038 | 0.034 | 0.01       | 0.058         | 0.16          | 0.022 | 0.006      | 0.649 |
| K260                     |         |               | AdmFP          |       |       |       |            |               |               |       |            |       |
| K261                     | 0.158   | 1.32          | CFP-BC+SEM     | 0.047 | 0.015 | 0.015 | 0.00       | 0.895         | 0.005         | 0.008 | 0.007      | 0.005 |
| K262                     | 0.263   | 1.53          | CFP-BC+SEM     | 0.007 | 0.008 | 0.007 | 0.00       | 0.927         | 0.007         | 0.024 | 0.01       | 0.007 |
| K263                     | 0.184   | 1.37          | CFP-BC+SEM     | 0.026 | 0.017 | 0.011 | 0.00       | 0.909         | 0.008         | 0.016 | 0.006      | 0.005 |
| K265                     | 0.222   | 1.44          | AdmFP+SEM      | 0.038 | 0.102 | 0.061 | 0.01       | 0.116         | 0.025         | 0.021 | 0.007      | 0.622 |
| K266                     | 0.111   | 1.22          | AdmFP          | 0.05  | 0.112 | 0.062 | 0.01       | 0.248         | 0.056         | 0.276 | 0.006      | 0.185 |
| K267                     | 0.111   | 1.22          | AdmFP          | 0.058 | 0.084 | 0.047 | 0.00       | 0.067         | 0.272         | 0.059 | 0.011      | 0.398 |
| K268                     |         |               | AdmFP          |       |       |       |            |               |               |       |            |       |
| K269                     | 0.167   | 1.33          | AdmFP          | 0.07  | 0.032 | 0.073 | 0.04       | 0.11          | 0.049         | 0.38  | 0.011      | 0.237 |
| K270                     | 0.088   | 1.18          | AdmFP          | 0.038 | 0.029 | 0.022 | 0.00       | 0.03          | 0.019         | 0.847 | 0.004      | 0.007 |
| K271                     |         |               | AdmFP          |       |       |       |            |               |               |       |            |       |
| K272                     | 0.094   | 1.19          | AdmFP          | 0.008 | 0.013 | 0.009 | 0.00       | 0.008         | 0.007         | 0.942 | 0.003      | 0.006 |
| K273                     | 0.176   | 1.35          | AdmFP          | 0.032 | 0.022 | 0.022 | 0.01       | 0.016         | 0.016         | 0.869 | 0.003      | 0.014 |
| K274                     | 0.353   | 1.71          | AdmFP+SEM      | 0.031 | 0.134 | 0.032 | 0.01       | 0.047         | 0.181         | 0.055 | 0.07       | 0.44  |
| K275                     | 0.278   | 1.56          | AdmFP+SEM      | 0.016 | 0.38  | 0.032 | 0.00       | 0.014         | 0.176         | 0.01  | 0.032      | 0.336 |
| K276                     | 0.214   | 1.43          | AdmFP+SEM      | 0.025 | 0.444 | 0.05  | 0.00       | 0.017         | 0.15          | 0.009 | 0.007      | 0.293 |
| K277                     |         |               | AdmFP          |       |       |       |            |               |               |       |            |       |
| K278                     |         |               | AdmFP          |       |       |       |            |               |               |       |            |       |
| K280                     |         |               | Unknown        |       |       |       |            |               |               |       |            |       |
| K281                     |         |               | AdmFP          |       |       |       |            |               |               |       |            |       |
| K282                     |         |               | AdmFP          |       |       |       |            |               |               |       |            |       |
| K283                     |         |               | Unknown        |       |       |       |            |               |               |       |            |       |
| K284                     |         |               | Unknown        |       |       |       |            |               |               |       |            |       |
| K285                     |         |               | Unknown        |       |       |       |            |               |               |       |            |       |
| K286                     |         |               | Unknown        |       |       |       |            |               |               |       |            |       |
| K287                     |         |               | Unknown        |       |       |       |            |               |               |       |            |       |
| K288                     |         |               | Unknown        |       |       |       |            |               |               |       |            |       |
| K289                     |         |               | Unknown        |       |       |       |            |               |               |       |            |       |
| K290                     |         |               | Unknown        |       |       |       |            |               |               |       |            |       |
| K291                     |         |               | AdmFP          |       |       |       |            |               |               |       |            |       |
| K292                     |         |               | AdmFP          |       |       |       |            |               |               |       |            |       |
| K293                     |         |               | AdmFP          |       |       |       |            |               |               |       |            |       |
| K294                     |         |               | Unknown        |       |       |       |            |               |               |       |            |       |
| K295                     |         |               | Unknown        |       |       |       |            |               |               |       |            |       |
| K296                     |         |               | Unknown        |       |       |       |            |               |               |       |            |       |
| K297                     |         |               | AdmFP          |       |       |       |            |               |               |       |            |       |

**GENETIC DIVERSITY**

**STRUCTURE ANALYSIS (K=9)**

| Field ID & Genetic group | Avg Het | Avg # Alleles | Heritage Calls | CFP   | CFP   | CFP   | EVG +AdmFP | CFP-BC +AdmFP | CFP-BC +AdmFP | AdmFP | AdmFP +SEM | TX-BC |
|--------------------------|---------|---------------|----------------|-------|-------|-------|------------|---------------|---------------|-------|------------|-------|
|                          |         |               |                | 1     | 2     | 3     | 4          | 5             | 6             | 7     | 8          | 9     |
| K298                     |         |               | AdmFP          |       |       |       |            |               |               |       |            |       |
| K299                     |         |               | AdmFP          |       |       |       |            |               |               |       |            |       |
| unmar Ked2               |         |               | EVG-BC         |       |       |       |            |               |               |       |            |       |
| FP080 fetus #1           | 0.088   | 1.18          | CFP            | 0.021 | 0.759 | 0.165 | 0.00       | 0.032         | 0.008         | 0.004 | 0.003      | 0.004 |
| FP080 fetus #2           | 0.105   | 1.21          | CFP            | 0.02  | 0.861 | 0.084 | 0.00       | 0.015         | 0.008         | 0.003 | 0.002      | 0.004 |
| FP080 fetus #3           | 0.105   | 1.21          | CFP            | 0.017 | 0.858 | 0.084 | 0.00       | 0.019         | 0.009         | 0.003 | 0.002      | 0.003 |
| FP116 fetus #1           | 0.100   | 1.20          | Unknown        |       |       |       |            |               |               |       |            |       |
| FP116 fetus #2           | 0.184   | 1.37          | Unknown        |       |       |       |            |               |               |       |            |       |
| <b>TEXAS FE</b>          |         |               |                |       |       |       |            |               |               |       |            |       |
| TX101-BCNP BI            | 0.348   | 1.70          | TX             | 0.006 | 0.005 | 0.009 | 0.03       | 0.013         | 0.048         | 0.019 | 0.031      | 0.843 |
| Tx103 fetus #1           | 0.375   | 1.75          | CFP-F1         |       |       |       |            |               |               |       |            |       |
| TX102-BCNP BI            | 0.391   | 1.78          | TX             |       |       |       |            |               |               |       |            |       |
| TX103-LP                 | 0.381   | 1.76          | TX             |       |       |       |            |               |               |       |            |       |
| TX104-FSSP               | 0.342   | 1.68          | TX             |       |       |       |            |               |               |       |            |       |
| TX105-ENP                | 0.283   | 1.57          | TX             | 0.004 | 0.01  | 0.013 | 0.14       | 0.007         | 0.018         | 0.427 | 0.033      | 0.354 |
| TX106-FSSP               | 0.262   | 1.52          | TX             | 0.004 | 0.004 | 0.004 | 0.02       | 0.004         | 0.037         | 0.771 | 0.062      | 0.097 |
| TX107-RP                 | 0.326   | 1.65          | TX             | 0.003 | 0.004 | 0.003 | 0.00       | 0.006         | 0.007         | 0.027 | 0.084      | 0.864 |
| TX108-ENP                | 0.370   | 1.74          | TX             | 0.004 | 0.005 | 0.005 | 0.53       | 0.006         | 0.02          | 0.006 | 0.175      | 0.253 |

**GENETIC DIVERSITY**

**STRUCTURE ANALYSIS (K=9)**

| Field ID & Genetic group | Avg Het | Avg # Alleles | Heritage Calls | CFP   | CFP   | CFP   | EVG +AdmFP | CFP-BC +AdmFP | CFP-BC +AdmFP | AdmFP | AdmFP +SEM | TX-BC |
|--------------------------|---------|---------------|----------------|-------|-------|-------|------------|---------------|---------------|-------|------------|-------|
|                          |         |               |                | 1     | 2     | 3     | 4          | 5             | 6             | 7     | 8          | 9     |
| <b>SEMINOLE</b>          |         |               |                |       |       |       |            |               |               |       |            |       |
| WC00 "Little Boy"        | 0.283   | 1.57          | Seminole       | 0.004 | 0.004 | 0.005 | 0.00       | 0.008         | 0.003         | 0.008 | 0.961      | 0.004 |
| WC01 "castrated 10m"     | 0.310   | 1.62          | Seminole       | 0.016 | 0.008 | 0.013 | 0.00       | 0.006         | 0.017         | 0.028 | 0.890      | 0.018 |
| WC02 "Opal daughter"     | 0.250   | 1.50          | Seminole       | 0.009 | 0.011 | 0.008 | 0.00       | 0.017         | 0.01          | 0.016 | 0.916      | 0.009 |
| WC03                     | 0.211   | 1.42          | Seminole       | 0.008 | 0.008 | 0.007 | 0.00       | 0.012         | 0.008         | 0.005 | 0.946      | 0.005 |
| WC04 "neutered"          | 0.325   | 1.65          | Seminole       | 0.03  | 0.022 | 0.013 | 0.00       | 0.042         | 0.015         | 0.01  | 0.784      | 0.08  |
| WC05 "Taz"               | 0.333   | 1.67          | Seminole       | 0.03  | 0.013 | 0.012 | 0.01       | 0.022         | 0.011         | 0.007 | 0.891      | 0.01  |
| WC06 "castrated 10"      | 0.326   | 1.65          | Seminole       | 0.009 | 0.014 | 0.007 | 0.00       | 0.006         | 0.032         | 0.005 | 0.910      | 0.014 |
| WC07 "Opal"              | 0.341   | 1.68          | Seminole       | 0.012 | 0.009 | 0.008 | 0.01       | 0.012         | 0.015         | 0.067 | 0.855      | 0.016 |
| WC08 "Bubba"             | 0.381   | 1.76          | Seminole       | 0.009 | 0.006 | 0.006 | 0.00       | 0.015         | 0.009         | 0.006 | 0.939      | 0.007 |
| <b>PIPER - E</b>         |         |               |                |       |       |       |            |               |               |       |            |       |
| Piper "Cmp Kala"         | 0.214   | 1.43          | Piper          |       |       |       |            |               |               |       |            |       |
| Piper "Offspring"        | 0.250   | 1.50          | Piper          |       |       |       |            |               |               |       |            |       |
| Piper "Ocho"             | 0.283   | 1.57          | Piper          |       |       |       |            |               |               |       |            |       |
| Piper "Bert Wah"         | 0.194   | 1.39          | Piper          |       |       |       |            |               |               |       |            |       |
| Piper "Dies Dos"         | 0.316   | 1.63          | Piper          |       |       |       |            |               |               |       |            |       |
| Piper "Kima"             | 0.261   | 1.52          | Piper          |       |       |       |            |               |               |       |            |       |
| Piper "Survivor"         | 0.312   | 1.63          | Piper          |       |       |       |            |               |               |       |            |       |
| Piper "Florida"          | 0.250   | 1.50          | Piper          |       |       |       |            |               |               |       |            |       |
| Piper "Osceola"          | 0.413   | 1.83          | Piper          |       |       |       |            |               |               |       |            |       |
| Piper "Hayeta"           | 0.273   | 1.55          | Piper          |       |       |       |            |               |               |       |            |       |
| Piper "Synda"            | 0.386   | 1.77          | Piper          |       |       |       |            |               |               |       |            |       |
| Piper "Delilah / f"      | 0.238   | 1.48          | Piper          |       |       |       |            |               |               |       |            |       |
| Piper "Baca"             | 0.286   | 1.57          | Piper          |       |       |       |            |               |               |       |            |       |
| Piper "Numa"             | 0.357   | 1.71          | Piper          |       |       |       |            |               |               |       |            |       |

Supplemental table 3. A) All free-ranging Florida panthers (> 1.5 years-old) of all genetic heritages B) Canonical Florida panthers (CFP), C) Everglades Florida panthers (EVG) and D) Texas (TX) combined with Seminole (SEM) panthers, estimates of molecular genetic variation (mean individual percent observed heterozygosity  $\pm$  standard error (SE) and average number of alleles per locus  $\pm$  SE estimated from 23 STR loci) and occurrence of physiological traits in Florida panthers alive during three time periods prior to the release of Texas females and two time periods post-release. Sample sizes for each estimate is in parentheses. Percentage of panthers with cowlicks, kinked tails, average number of testicles for males, and percentage of panthers with atrial septal defects were collected during handling of animals in the field or during necropsy.

A.

| Heritage Group              | No. per group | Average Heterozygosity | Average No. Alleles per locus | <sup>A</sup> No. of descended testicles | Proportion of males cryptorchid | Proportion with atrial septal defects | Proportion with Kinked tails | Proportion with cowlick on thorax | Proportion with at least 1 trait |
|-----------------------------|---------------|------------------------|-------------------------------|-----------------------------------------|---------------------------------|---------------------------------------|------------------------------|-----------------------------------|----------------------------------|
| <b>ALL Florida Panthers</b> |               |                        |                               |                                         |                                 |                                       |                              |                                   |                                  |
| <b>Pre-Introgression</b>    |               |                        |                               |                                         |                                 |                                       |                              |                                   |                                  |
| 1970-1984                   | 33            | 0.231 ± 0.017<br>(27)  | 1.46 ± 0.03<br>(27)           | 1.67 ± 0.14<br>(12)                     | 0.33 ± 0.14<br>(12)             | 0.33 ± 0.21<br>(6)                    | 0.86 ± 0.07<br>(29)          | 0.79 ± 0.08<br>(28)               | 0.71 ± 0.06<br>(31)              |
| 1985-1989                   | 37            | 0.208 ± 0.014<br>(36)  | 1.42 ± 0.03<br>(36)           | 1.53 ± 0.12<br>(18)                     | 0.5 ± 0.12<br>(18)              | 0.16 ± 0.09<br>(18)                   | 0.68 ± 0.08<br>(37)          | 0.75 ± 0.07<br>(36)               | 0.58 ± 0.06<br>(37)              |
| 1990-1995                   | 62            | 0.190 ± 0.009<br>(62)  | 1.38 ± 0.02<br>(62)           | 1.33 ± 0.10<br>(35)                     | 0.63 ± 0.08<br>(35)             | 0.21 ± 0.07<br>(34)                   | 0.77 ± 0.05<br>(61)          | 0.74 ± 0.06<br>(62)               | 0.64 ± 0.04<br>(62)              |
| <b>Post-Introgression</b>   |               |                        |                               |                                         |                                 |                                       |                              |                                   |                                  |
| 1996-1998                   | 67            | 0.220 ± 0.011<br>(64)  | 1.44 ± 0.02<br>(64)           | 1.38 ± 0.12<br>(26)                     | 0.54 ± 0.10<br>(26)             | 0.06 ± 0.04<br>(31)                   | 0.59 ± 0.06<br>(61)          | 0.63 ± 0.06<br>(62)               | 0.48 ± 0.04<br>(64)              |
| 1999-2001                   | 102           | 0.224 ± 0.009<br>(101) | 1.45 ± 0.02<br>(101)          | 1.56 ± 0.09<br>(41)                     | 0.42 ± 0.08<br>(41)             | 0.07 ± 0.04<br>(46)                   | 0.51 ± 0.05<br>(95)          | 0.49 ± 0.05<br>(93)               | 0.41 ± 0.03<br>(96)              |
| 2002-2004                   | 139           | 0.226 ± 0.007<br>(137) | 1.45 ± 0.01<br>(137)          | 1.77 ± 0.05<br>(65)                     | 0.23 ± 0.05<br>(65)             | 0.06 ± 0.03<br>(72)                   | 0.43 ± 0.04<br>(133)         | 0.42 ± 0.04<br>(126)              | 0.34 ± 0.04<br>(134)             |
| 2005-2007                   | 116           | 0.240 ± 0.007<br>(105) | 1.48 ± 0.01<br>(105)          | 1.88 ± 0.04<br>(59)                     | 0.12 ± 0.04<br>(59)             | 0.09 ± 0.04<br>(53)                   | 0.31 ± 0.04<br>(110)         | 0.26 ± 0.04<br>(107)              | 0.23 ± 0.03<br>(111)             |

B.

| Heritage Group                        | No. per group | Average Heterozygosity | Average No. Alleles per locus | <sup>A</sup> No. of descended testicles | Proportion of males cryptorchid | Proportion with Atrial Septal defects | Proportion with Kinked tails | Proportion with cowlick on thorax | Proportion with at least 1 trait |
|---------------------------------------|---------------|------------------------|-------------------------------|-----------------------------------------|---------------------------------|---------------------------------------|------------------------------|-----------------------------------|----------------------------------|
| <b>All Canonical Florida Panthers</b> |               |                        |                               |                                         |                                 |                                       |                              |                                   |                                  |
| <b>Pre-Introgression</b>              |               |                        |                               |                                         |                                 |                                       |                              |                                   |                                  |
| 1970-1984                             | 26            | 0.188 ± 0.010<br>(20)  | 1.38 ± 0.02<br>(20)           | 1.6 ± 0.14<br>(10)                      | 0.40 ± 0.16<br>(10)             | 0.40 ± 0.24<br>(10)                   | 1.00 ± 0<br>(24)             | 0.86 ± 0.07<br>(22)               | 0.81 ± 0.05<br>(25)              |
| 1985-1989                             | 28            | 0.182 ± 0.010<br>(27)  | 1.36 ± 0.02<br>(27)           | 1.4 ± 0.13<br>(15)                      | 0.60 ± 0.13<br>(15)             | 0.20 ± 0.11<br>(15)                   | 0.89 ± 0.06<br>(28)          | 0.93 ± 0.05<br>(27)               | 0.74 ± 0.04<br>(28)              |
| 1990-1995                             | 51            | 0.175 ± 0.007<br>(51)  | 1.35 ± 0.01<br>(51)           | 1.2 ± 0.10<br>(29)                      | 0.76 ± 0.08<br>(29)             | 0.24 ± 0.08<br>(29)                   | 0.86 ± 0.05<br>(50)          | 0.86 ± 0.05<br>(51)               | 0.74 ± 0.03<br>(51)              |
| <b>Post-Introgression</b>             |               |                        |                               |                                         |                                 |                                       |                              |                                   |                                  |
| 1996-1998                             | 41            | 0.164 ± 0.008<br>(40)  | 1.33 ± 0.02<br>(40)           | 1.2 ± 0.14<br>(21)                      | 0.67 ± 0.11<br>(21)             | 0.08 ± 0.05<br>(26)                   | 0.87 ± 0.06<br>(38)          | 0.79 ± 0.07<br>(69)               | 0.64 ± 0.04<br>(41)              |
| 1999-2001                             | 42            | 0.161 ± 0.008<br>(42)  | 1.32 ± 0.02<br>(42)           | 1.2 ± 0.12<br>(21)                      | 0.71 ± 0.10<br>(21)             | 0.08 ± 0.06<br>(24)                   | 0.93 ± 0.04<br>(40)          | 0.73 ± 0.07<br>(41)               | 0.69 ± 0.04<br>(41)              |
| 2002-2004                             | 40            | 0.158 ± 0.007<br>(40)  | 1.32 ± 0.01<br>(40)           | 1.3 ± 0.11<br>(18)                      | 0.67 ± 0.11<br>(18)             | 0.09 ± 0.06<br>(22)                   | 0.89 ± 0.05<br>(38)          | 0.74 ± 0.07<br>(38)               | 0.69 ± 0.04<br>(39)              |
| 2005-2007                             | 11            | 0.144 ± 0.015<br>(11)  | 1.29 ± 0.03<br>(11)           | 1.0 ± 0<br>(2)                          | 1.0 ± 0<br>(2)                  | 0 ± 0<br>(3)                          | 0.90 ± 0.10<br>(10)          | 0.80 ± 0.13<br>(10)               | 0.80 ± 0.10<br>(10)              |



C.

| Heritage Group                         | No. per group | Average Heterozygosity | Average No. Alleles per locus | <sup>A</sup> No. of descended testicles | Proportion of males cryptorchid | Proportion with Atrial Septal defects | Proportion with Kinked tails | Proportion with cowlick on thorax | Proportion with at least 1 trait |
|----------------------------------------|---------------|------------------------|-------------------------------|-----------------------------------------|---------------------------------|---------------------------------------|------------------------------|-----------------------------------|----------------------------------|
| <b>All Everglades Florida Panthers</b> |               |                        |                               |                                         |                                 |                                       |                              |                                   |                                  |
| <b>Pre-Introgression</b>               |               |                        |                               |                                         |                                 |                                       |                              |                                   |                                  |
| 1970-1984                              | 7             | 0.355 ± 0.022<br>(7)   | 1.71 ± 0.04<br>(7)            | 2.0 ± 0<br>(2)                          | 0<br>(2)                        | 0<br>(1)                              | 0.20 ± 0.20<br>(6)           | 0.50 ± 0.22<br>(6)                | 0.31 ± 16.3<br>(6)               |
| 1985-1989                              | 9             | 0.286 ± 0.035<br>(9)   | 1.57 ± 0.07<br>(9)            | 2.0 ± 0<br>(3)                          | 0<br>(3)                        | 0<br>(4)                              | 0<br>(2)                     | 0.22 ± 0.15<br>(9)                | 0.06 ± 0.04<br>(9)               |
| 1990-1995                              | 11            | 0.260 ± 0.030<br>(11)  | 1.52 ± 0.06<br>(11)           | 2.0 ± 0<br>(6)                          | 0<br>(6)                        | 0<br>(5)                              | 0.36 ± 0.15<br>(11)          | 0.18 ± 0.12<br>(11)               | 0.18 ± 0.07<br>(11)              |
| <b>Post-Introgression</b>              |               |                        |                               |                                         |                                 |                                       |                              |                                   |                                  |
| 1996-1998                              | 3             | 0.273 ± 0.059<br>(3)   | 1.55 ± 0.12<br>(3)            | 2.0<br>(1)                              | 0<br>(1)                        | 0<br>(1)                              | 0.33 ± 0.33<br>(3)           | 0.33 ± 0.33<br>(3)                | 0.33 ± 0.33<br>(3)               |
| 1999-2001                              | 3             | 0.273 ± 0.059<br>(3)   | 1.55 ± 0.12<br>(3)            | 2.0<br>(1)                              | 0<br>(1)                        | 0<br>(1)                              | 0.33 ± 0.33<br>(3)           | 0.33 ± 0.33<br>(3)                | 0.33 ± 0.33<br>(3)               |

D.

| Heritage Group                      | No. per group | Average Heterozygosity | Average No. Alleles per locus | <sup>A</sup> No. of descended testicles | Proportion of males cryptorchid | Proportion with Atrial Septal defects | Proportion with Kinked tails | Proportion with cowlick on thorax | Proportion with at least 1 trait |
|-------------------------------------|---------------|------------------------|-------------------------------|-----------------------------------------|---------------------------------|---------------------------------------|------------------------------|-----------------------------------|----------------------------------|
| <b>Texas Founders</b>               |               |                        |                               |                                         |                                 |                                       |                              |                                   |                                  |
| <b>Pre-Introgression</b>            |               |                        |                               |                                         |                                 |                                       |                              |                                   |                                  |
| 1996-2001                           | 8             | 0.324 ± 0.015<br>(8)   | 1.65 ± 0.03<br>(8)            | NR                                      | NR                              | NR                                    | 0<br>(5)                     | 0<br>(5)                          | 0<br>(5)                         |
| <b>All AdmFP Post-Introgression</b> |               |                        |                               |                                         |                                 |                                       |                              |                                   |                                  |
| 1996-1998                           | 10            | 0.320 ± 0.011<br>(9)   | 1.64 ± 0.02<br>(9)            | 2.0 ± 0<br>(3)                          | 0<br>(3)                        | 0<br>(2)                              | 0.10 ± 0.10<br>(10)          | 0.50 ± 0.17<br>(10)               | 0.23 ± 0.08<br>(10)              |
| 1999-2001                           | 49            | 0.260 ± 0.011<br>(48)  | 1.52 ± 0.02<br>(48)           | 1.9 ± 0.07<br>(19)                      | 0.11 ± 0.07<br>(19)             | 0.05 ± 0.05<br>(21)                   | 0.21 ± 0.06<br>(47)          | 0.34 ± 0.07<br>(44)               | 0.22 ± 0.04<br>(47)              |
| 2002-2004                           | 96            | 0.253 ± 0.007<br>(96)  | 1.51 ± 0.01<br>(96)           | 1.9 ± 0.04<br>(46)                      | 0.07 ± 0.04<br>(46)             | 0.04 ± 0.03<br>(49)                   | 0.23 ± 0.04<br>(92)          | 0.29 ± 0.05<br>(86)               | 0.18 ± 0.02<br>(92)              |
| 2005-2007                           | 94            | 0.251 ± 0.007<br>(94)  | 1.50 ± 0.01<br>(94)           | 1.9 ± 0.04<br>(51)                      | 0.10 ± 0.04<br>(51)             | 0.11 ± 0.05<br>(45)                   | 0.22 ± 0.04<br>(89)          | 0.21 ± 0.04<br>(86)               | 0.17 ± 0.02<br>(90)              |

Supplemental table 4. Estimated annual survival rates  $\pm$  SE by sex and age class. For this analysis, kittens are defined as age 0-1 year for both sexes, sub-adults as age 1-2.5 years for females and 1-3.5 years for males, and prime-adults as age 2.5-10 years for females and 3.5–10 years for males. Panthers that could not be classified as CFP, CFPxTX-F1, EVGxTX-F1, TX-BC or EVG-BC and adults > 10 yrs old were excluded. One single-remaining pre-restoration EVG female was included with the CFP in the sub-adult and prime-adult analysis. Results from a model with two ancestry categories (1: CFP and CFP-BC and 2: EVG-BC, TX-BC, CFPxTX-F1 and EVGxTX-F1) are presented for kitten survival and results from a model with two different ancestry categories (1: CFP, CFP-BC, EVG-BC, and TX-BC and 2: CFPxTX-F1 and EVGxTX-F1) are presented for sub-adults and prime-adults. Both models were significantly ( $p < 0.05$ ) better supported by the data than the equivalent models without ancestry effects.

| Age Class   | Sex    | CFP and<br>CFP-BC | TX-BC and<br>EVG-BC | CFPxTX-F1 and<br>EVGxTX-F1 |
|-------------|--------|-------------------|---------------------|----------------------------|
| Kitten      | All    | 0.243 $\pm$ 0.061 | 0.518 $\pm$ 0.107   | 0.518 $\pm$ 0.107          |
| Sub-Adult   | Female | 0.958 $\pm$ 0.041 |                     | 0.995 $\pm$ 0.007          |
| Sub-Adult   | Male   | 0.681 $\pm$ 0.073 |                     | 0.957 $\pm$ 0.044          |
| Prime-Adult | Female | 0.825 $\pm$ 0.039 |                     | 0.978 $\pm$ 0.022          |
| Prime-Adult | Male   | 0.787 $\pm$ 0.057 |                     | 0.973 $\pm$ 0.028          |

Supplemental Table 5. Comparison of testicular volume and two measures of sperm morphology (percentage normal sperm and percentage abnormal acrosomes) among ejaculates from live canonical Florida panthers (CFP), Everglades Florida panthers (EVG), admixed Florida panthers (AdmFP) and Texas pumas, as well as from CFP and AdmFP testes rescued post mortem. Number of individuals examined listed in parentheses. Expanded data in table S6.

<sup>1</sup>Testicular volume in each male included only descended testicles. Within columns, similar letters indicate that no differences were observed ( $p < 0.05$ ).

<sup>2</sup>Electro-ejaculation was performed under anesthesia.

<sup>3</sup>Percentage cryptorchid: CFP = 43.8%; AdmFP = 25%, EVG, CFP-TX-F1, and TX = 0%.

<sup>4</sup>Data from 11 CFP males, 5 EVG males, 9 TX males, and 7 Colorado males are from (S24); an additional 5 CFP males were included for a total of 16 CFP males.

<sup>5</sup>Aspermia: 1 ejaculated and 1 gamete rescue CFP was aspermic and oligospermic, respectively, and 4 of the AdmFP were aspermic (2 ejaculates and 2 gamete rescues).

<sup>6</sup>Testes were collected post-mortem, thus testicular volume does not include the scrotum.

<sup>7</sup>Percentage of these males cryptorchid: CFP = 50% AdmFP = 0%.

<sup>8</sup>Western males were not included in statistical evaluation [raw data from (S24) was not available] and ejaculated and gamete rescued male data were analyzed separately. For ejaculated males, testicular volume CFP < AdmFP ( $p = 0.05$ ), CFP < F1s ( $p = 0.001$ ), EVG < F1s ( $p = 0.01$ ), and AdmFP < F1s ( $p = 0.07$ ). For percent normal sperm CFP < EVG ( $p = 0.03$ ), F1s > all others ( $p < 0.001$ ). For abnormal acrosomes F1s < all others ( $p < 0.002$ ). For the gamete rescue males, testicular volume CFP < AdmFP ( $p = 0.005$ ), normal sperm CFP < AdmFP ( $p = 0.08$ ) (Fishers exact test in each comparison).

| Panther population and sampling method                          | Testicular <sup>1</sup> volume (cm <sup>3</sup> ) ± SE | Spermatozoa morphology percent ± SE |                           |
|-----------------------------------------------------------------|--------------------------------------------------------|-------------------------------------|---------------------------|
|                                                                 |                                                        | Normal                              | Abnormal acrosomes        |
| <b>Ejaculates from live Florida males<sup>2</sup></b>           |                                                        |                                     |                           |
|                                                                 | 11.3 ± 1.6 <sup>A</sup>                                | 5.4 ± 0.7 <sup>C</sup>              | 38.9 ± 3.2 <sup>A,C</sup> |
| Canonical Florida panthers (16) <sup>3,4,5</sup>                | (15)                                                   | (15)                                | (15)                      |
|                                                                 | 14.0 ± 1.9 <sup>B</sup>                                | 9.5 ± 0.6 <sup>B</sup>              | 38.8 ± 2.8 <sup>A,C</sup> |
| Everglades Florida panthers (5) <sup>3,4</sup>                  | (4)                                                    | (5)                                 | (5)                       |
| Admixed Florida panthers                                        |                                                        |                                     |                           |
|                                                                 | 18.2 ± 3.1 <sup>B,C</sup>                              | 7.0 ± 6.0 <sup>B,C</sup>            | 51.5 ± 7.5 <sup>A,C</sup> |
| All AdmFP except F1s (4) <sup>3,5</sup>                         | (4)                                                    | (2)                                 | (2)                       |
|                                                                 | 27.7 ± 1.8 <sup>D</sup>                                | 20.5 ± 4.5 <sup>A</sup>             | 7.0 ± 3.0 <sup>B</sup>    |
| CFPxTX-F1 C (2) <sup>3</sup>                                    | (2)                                                    | (2)                                 | (2)                       |
| <b>Gametes rescued from testes at post-mortem<sup>6</sup></b>   |                                                        |                                     |                           |
|                                                                 | 8.8 ± 1.0 <sup>N</sup>                                 | 10.1 ± 1.9 <sup>N</sup>             | 35.3 ± 2.8 <sup>N,C</sup> |
| Canonical Florida panthers (14) <sup>5,7</sup>                  | (10)                                                   | (13)                                | (13)                      |
|                                                                 | 15.1 ± 1.7 <sup>P</sup>                                | 16.9 ± 3.6 <sup>P</sup>             | 31.0 ± 5.3 <sup>N,C</sup> |
| Admixed Florida panthers (14) <sup>5,7</sup>                    | (9)                                                    | (10)                                | (10)                      |
| <b>Ejaculates from live Western U.S. male pumas<sup>8</sup></b> |                                                        |                                     |                           |
|                                                                 | 17.8 ± 1.7                                             | 14.0 ± 3.5                          | 13.8 ± 1.2                |
| Texas males (9) <sup>3,4</sup>                                  | (9)                                                    | (9)                                 | (9)                       |
|                                                                 | 10.8 ± 0.7                                             | 16.3 ± 2.1                          | 19.5 ± 0.8                |
| Colorado males (7) <sup>4</sup>                                 | (7)                                                    | (7)                                 | (7)                       |

Supplemental Table 6. Detail of data used to calculate values in Table S5. Codes in column 2 refer to panther heritage categories (C=CFP, E=EVG, BE=EVG-BC, BF=CFP-BC, BxT=TX-BC, AD=AdmFP, % Texas Unknown, \* = inbred; †= related to FP79; S = sire; L+ = grand sire). \*\*This animal had high % microcephalic and spermatids - ~18% of each

| Collection method | Codes <sup>A</sup> | Panther ID | No. of Testes     | Testes vol. per male | Vol / testis | % normal     | %Acro+ Head  | Date      |
|-------------------|--------------------|------------|-------------------|----------------------|--------------|--------------|--------------|-----------|
| <b>CANONICAL</b>  |                    |            |                   |                      |              |              |              |           |
| Ejaculation       | C                  | FP07       | 2                 | ND                   | ND           | 8.3          | 44.0         | 26-Jan-85 |
| Ejaculation       | C                  | FP12       | 1                 | 8.81                 | 8.8          | 5.7          | 39.7         | 28-Jan-86 |
| Ejaculation       | C                  | FP13       | 2                 | 14.91                | 7.5          | 10.3         | 46.0         | 27-Feb-86 |
| Ejaculation       | C                  | FP17       | 2                 | 13.77                | 6.9          | 10.0         | 29.0         | 26-Jan-89 |
| Ejaculation       | C                  | FP20       | 1                 | 6.85                 | 6.9          | 4.5          | 41.5         | 10-Jul-87 |
| Ejaculation       | C                  | FP24       | 2                 | 21.22                | 10.6         | 4.0          | 52.5         | 30-Jan-88 |
| Ejaculation       | C                  | FP26       | 1                 | 5.45                 | 5.5          | 2.0          | 49.3         | 1-Mar-88  |
| Ejaculation       | C                  | FP28       | 1                 | 7.39                 | 7.4          | 4.5          | <b>3.6**</b> | 24-Jan-92 |
| Ejaculation       | C                  | FP29       | 1                 | 5.67                 | 5.7          | 3.0          | 31.5         | 12-Feb-90 |
| Ejaculation       | C                  | FP33       | 2                 | 12.74                | 6.4          | 2.5          | 51.2         | 5-Mar-89  |
| Ejaculation       | C                  | FP34       | 1                 | 5.29                 | 5.3          | 5.5          | 35.5         | 11-Jan-91 |
| Ejaculation       | C                  | FP39       | 2                 | 7.25                 | 3.6          | 7.5          | 30.0         | 19-Feb-90 |
| Ejaculation       | C                  | FP43       | 1                 | 3.09                 | 3.09         | aspermic     |              | 8-Jan-91  |
| Ejaculation       | C                  | FP51       | 2                 | 20.6                 | 10.3         | 5            | 46           | 28-Jan-98 |
| Ejaculation       | C                  | FP54       | 2                 | 17.0                 | 8.5          | 2            | 37           | 1-Jan-04  |
| Ejaculation       | C                  | FP60       | 2                 | 19.0                 | 9.5          | 6            | 46           | 1-Jan-04  |
|                   |                    |            | N=                | 16                   | 15           | 15           | 15           | 14        |
|                   |                    |            | <b>Ave canoni</b> | 1.56                 | 11.27        | 7.05         | 5.39         | 38.85     |
|                   |                    |            | S.E.              | 0.13                 | 1.58         | 0.58         | 0.69         | 3.18      |
| GamResc           | C                  | FP4        | 1                 | 6.85                 | 6.9          | 6.0          | 48.0         | 19-Apr-85 |
| GamResc           | C                  | FP13       | 2                 | ND                   | ND           | 18.0         | 35.0         | 15-Feb-87 |
| GamResc           | C                  | FP20       | 1                 | 6.01                 | 6.0          | 6.5          | 47.5         | 24-Aug-88 |
| GamResc           | C                  | FP30       | 1                 | ND                   | ND           | 12.0         | 22.0         | 30-Jan-90 |
| GamResc           | C                  | FP33       | 2                 | 15.09                | 7.5          | 25.5         | 26.0         | 23-Nov-89 |
| GamResc           | C                  | FP39       | 2                 | 5.25                 | 2.6          | 19.5         | 24.0         | 18-May-90 |
| GamResc           | C                  | UCFP018    | 1                 | 8.32                 | 8.3          | 9.0          | 52.5         | 26-Jan-89 |
| GamResc           | C                  | FP59       | 2                 | 12.4                 | 6.2          | 3            | 32           | 26-Nov-04 |
| GamResc           | C                  | UCFP035    | 1                 | ND                   | ND           | 6            | 40           | 23-Jun-00 |
| GamResc           | C                  | FP98       | 1                 | 8.0                  | 8.0          | 7            | 28           | 1-Jul-02  |
| GamResc           | C                  | FP99       | 2                 | 11.9                 | 6.0          | oligospermic |              | 28-Nov-02 |
| GamResc           | C                  | K128       | 2                 | 8.3                  | 4.2          | 5            | 42           | 8-Dec-04  |
| GamResc           | C                  | UCFP050    | 1                 | ND                   | ND           | 10           | 28           | 29-Jan-03 |
| GamResc           | C                  | UCFP063    | 1                 | 6.3                  | 6.3          | 4            | 34           | 27-Feb-04 |
|                   |                    |            | N=                | 14                   | 10           | 10           | 13           | 13        |
|                   |                    |            | <b>Ave canoni</b> | 1.43                 | 8.84         | 6.19         | 10.12        | 35.31     |
|                   |                    |            | S.E.              | 0.14                 | 1.02         | 0.55         | 1.90         | 2.75      |

| Collection method | Codes <sup>A</sup> | Panther ID | No. of Testes | Testes vol. per male | Vol / testis | % normal | %Acro+ Head | Date |
|-------------------|--------------------|------------|---------------|----------------------|--------------|----------|-------------|------|
|-------------------|--------------------|------------|---------------|----------------------|--------------|----------|-------------|------|

## Admixed Florida panthers

### EVERGLADES

|             |   |       |            |       |       |      |      |           |
|-------------|---|-------|------------|-------|-------|------|------|-----------|
| Ejaculation | E | FP16  | 2          | 14.47 | 7.2   | 9.5  | 48.5 | 2-Feb-88  |
| Ejaculation | E | FP25  | 2          | 17.75 | 8.9   | 11.5 | 31.0 | 16-Feb-88 |
| Ejaculation | E | FP37  | 2          | ND    | ND    | 7.5  | 38.0 | 30-Jan-90 |
| Ejaculation | E | FP42  | 2          | 8.71  | 4.4   | 9.5  | 38.5 | 5-Feb-91  |
| Ejaculation | E | FP200 | 2          | 14.91 | 7.5   | 9.5  | 38.0 | 17-Jan-90 |
|             |   |       | N=         | 5     | 4     | 4    | 5    | 5         |
|             |   |       | Ave canoni | 2.00  | 13.96 | 6.98 | 9.50 | 38.80     |
|             |   |       | S.E.       | 0.00  | 1.89  | 0.95 | 0.63 | 2.80      |

### CFPxTX-F1

|             |    |                        |        |      |       |       |       |           |
|-------------|----|------------------------|--------|------|-------|-------|-------|-----------|
| Ejaculation | F1 | FP065 <sub>F1-CT</sub> | 2      | 25.9 | 13.0  | 16    | 4     | 14-Feb-01 |
| Ejaculation | F1 | FP079 <sub>F1</sub>    | 2      | 29.5 | 14.7  | 25    | 10    | 15-Nov-00 |
|             |    |                        | Ave F1 | 2.00 | 27.68 | 13.84 | 20.50 | 7.00      |
|             |    |                        | S.E.   | 0.00 | 1.78  | 0.89  | 4.50  | 3.00      |

### Other AdmFP

|             |       |                          |            |      |       |          |      |           |
|-------------|-------|--------------------------|------------|------|-------|----------|------|-----------|
| Ejaculation | AD    | FP154                    | 1          | 9.5  | 9.5   | 13       | 44   | 21-Feb-07 |
| Ejaculation | BE*   | FP085 <sub>B-Enp</sub>   | 2          | 24.0 | 12.0  | 1        | 59   | 18-Feb-03 |
| Ejaculation | AD L  | FP131                    | 2          | 18.0 | 9.0   | aspermic |      | 22-Feb-07 |
| Ejaculation | BT* S | FP104 <sub>Bx(BxT)</sub> | 2          | 21.1 | 10.6  | aspermic |      | 28-Feb-05 |
|             |       |                          | N=         | 4    | 4     | 4        | 2    | 2         |
|             |       |                          | Ave Admixe | 1.75 | 18.15 | 10.26    | 7.00 | 51.50     |
|             |       |                          | S.E.       | 0.25 | 3.13  | 0.66     | 6.00 | 7.50      |

|         |       |                           |            |       |       |          |          |           |
|---------|-------|---------------------------|------------|-------|-------|----------|----------|-----------|
| GamResc | AD    | UCFP60                    | 2          | ND    | ND    | 18       | 34       | 13-Dec-03 |
| GamResc | BE    | FP084 <sub>B-FI</sub>     | 2          | ND    | ND    | 9        | 53       | 20-Apr-00 |
| GamResc | BF    | FP074                     | 2          | 12.72 | 6.36  | 12       | 17       | 8-Sep-99  |
| GamResc | BF    | UCFP089                   | 2          | 13.1  | 6.6   | 18       | 19       | 13-Dec-06 |
| GamResc | BF    | FP108 <sub>TXF1x(B)</sub> | 2          | 10.5  | 5.3   | 42       | 33       | 20-Nov-02 |
| GamResc | BF    | UCFP085                   | 2          | ND    | ND    | 22       | 33       | 6-Jun-06  |
| GamResc | BF    | FP152                     | 2          | 25.9  | 13.0  | 14       | 20       | 22/Oct/08 |
| GamResc | BF    | UCFP095                   | 2          | 16.1  | 8.0   | ND       | ND       | 19-Apr-07 |
| GamResc | BE*   | FP085 <sub>B-Enp</sub>    | 2          | 13.4  | 6.7   | ND       | ND       | 4-Mar-04  |
| GamResc | BT L  | K094 <sub>Bx(BxTX)</sub>  | 2          | 9.7   | 4.9   | 6        | 49       | 18-Aug-04 |
| GamResc | BT* S | FP090 <sub>Bx(BxT)</sub>  | 2          | ND    | ND    | 15       | <b>3</b> | 26-Apr-01 |
| GamResc | BT* S | UCFP051                   | 2          | 14.5  | 7.3   | 10       | 40       | 11-Mar-03 |
| GamResc | BT* S | FP104 <sub>Bx(BxT)</sub>  | 2          | ND    | ND    | aspermic |          | 10-Mar-06 |
| GamResc | SM    | FP132+SEM                 | 2          | 20.3  | 10.2  | aspermic |          | 23-Jul-04 |
|         |       |                           | N=         | 14    | 9     | 9        | 10       | 10        |
|         |       |                           | Ave admixe | 2.00  | 15.14 | 7.57     | 16.60    | 30.10     |
|         |       |                           | S.E.       | 0.00  | 1.70  | 0.85     | 3.20     | 4.88      |

## Supplemental References

- S1. E. D. Land, D. R. Garman, G. A. Holt, *Wildl. Soc. Bull.* **26**, 29 (1998).
- S2. S. K. Taylor, E. Land, M. Lotz, M. Roelke-Parker, S. Citino, D. Rothstein, Proc. Amer. Assoc. Zoo Vet., Omaha, Nebraska. (1998).
- S3. E. D. Land, D. B. Shinde, R. J. Kawula, J. F. Benson, M. A. Lotz, D. P. Onorato, *J. Wildl. Management*, **72**, 633 (2008).
- S4. E. D. Land, M. Cunningham, M. Lotz, M. Shindle, Florida panther annual report 2001-Florida Fish and Wildlife Conservation Commission, Tallahassee, FL (2002).
- S5. J. Sambrook, E. F. Fritsch, T. Maniatis, *Molecular cloning: A laboratory manual*. (Cold Spring Harbor Laboratory Press, Cold Spring Harbor, New York, NY, 1989).
- S6. G. W. Montgomery J. A. Sise, *N. Z. J. Agric. Res.* **33**, 437 (1990).
- S7. M. Menotti-Raymond, V. A. David, J. C. Stephens, L. A. Lyons, S. J. O'Brien, *J. Foren. Sci.* **42**, 1039 (1997).
- S8. M. Menotti-Raymond, V. A. David, L. A. Lyons, A. A. Schaffer, J. F. Tomlin, S. J. O'Brien, *Genomics* **57**, 9 (1999).
- S9. E. Minch, A. Ruiz-Linares, D. B. Goldstein, <http://lotka.stanford.edu/microsat.html>. (1995).
- S10. J. Felsenstein, Phylogeny inference package (PHYLIP), Version 3.5. Seattle: Univ. of Washington. (1985).
- S11. J. K. Pritchard, M. Stephens, P. Donnelly, *Genetics* **155**, 945 (2000).
- S12. T. C. Marshall, J. Slate, L. E. B. Kruuk, J. M. Pemberton, *Mol. Ecol.* **7**, 639 (1998).
- S13. D. Land, M. Lotz, D. Shindle, Annual Report Florida Panther Genetic Restoration and Management. The Florida Fish and Wildlife Conservation Commission and the US Fish and Wildlife Service. (2000).



S14. J. G. Howard, (1993). Semen collection and analysis in nondomestic carnivores. In *Zoo and Wild Animal Medicine: Current Therapy III* (Ed. M. E. Fowler), pp. 390- 399. W.B. Saunders Co., Philadelphia, PA.

S15. C. Pope, Y. Zhang, B. Dresser, *J. Zoo Wildl. Med.* **22**, 87 (1991).

S16. K. P. Burnham, A theory for combined analysis of ring recovery and recapture data, in: J. D. Lebreton, P. M. North (Eds.), *Marked individuals in the study of bird population*. Birkhäuser Verlag, Boston, MA, pp. 199-213. (1993).

S17. B. K. Williams, J. D. Nichols, M. J. Conroy, *Analysis and management of animal populations*. Academic Press, San Diego, CA, USA. (2002).

S18. J. A. Hostetler, D. P. Onorato, J. D. Nichols, W. E. Johnson, M. E. Roelke, S. J. O'Brien, D. Jansen, M. K. Oli, Genetic introgression and the survival of Florida panther kittens. *Biol. Conserv.* (2010), doi:10.1016/j.biocon.2010.07.028.

S19. D. R. Cox, *J. Royal Stat. Soc. Ser. B-Stat. Meth.* **34**, 187 (1972).

S20. T. M. Therneau, P. M. Grambsch, *Modeling Survival Data: Extending the Cox Model*. Springer, New York, N.Y., USA. (2000).

S21. J. A. Hostetler, D. P. Onorato, and M. K. Oli. *Population Ecology of the Florida panther*. The Florida Fish and Wildlife Conservation Commission and the US Fish and Wildlife Service. (2009).

S22. D. M. Heisey, B. R. Patterson, *J. Wildl. Management*, **70**, 1544 (2006).

S23. L. S. Mills, *Conservation of Wildlife Populations*. Blackwell Publishing. (2007).

S24. M. A. Barone, M. E. Roelke, J. Howard, J. L. Brown, A. E. Anderson, D. E. Wildt, *J. Mammalogy* **75**, 150 (1994).

S25. Acknowledgements: Many hands assisted in molecular genetic lab work and analyses, including Meredith Brown, Melanie Culver, Nicole Crumpler, Victor David, Randy Johnson, Janice Martenson, John Page, Polina Perelman, Marilyn Raymond, Mary Thompson, Anne Schmidt-Kuentzel, Allison J. Pearks Wilkerson, Bethany Buzzell, Erin Carney, Amanda Garfinkle, Laura

Eskander, Vladimir Tarasov, Aani Parish, and Christie Walker. Many people were involved in collecting the field information and/or managing the research efforts in southern Florida including Cougar McBride, Rocky McBride, and Rowdy McBride (Livestock Protection Company), Tom Logan, Tommy Hines, Tony Ruth, Marnie Lamm, Bambi Ferree, John Benson and Erin Leone (FWC), Steve Schulze (BCNP), Marc Criffield, Orin (Sonny) Bass (EVER), ,Mario Alvarado, and Lori Oberhofer. We greatly appreciated the help given by the staffs at BCNP, EVER, Florida Panther National Wildlife Refuge, Fakahatchee Strand State Preserve, Picayune Strand State Forest, Okaloacoochee Slough State Forest, and the Big Cypress Seminole Indian Reservation (BCSIR). The content of this paper does not necessarily reflect the views or policies of the Department of Interior, Department of Health and Human Services, the Florida Fish and Wildlife Conservation Commission nor does mention of trade names, commercial products, or organizations imply endorsement by the U.S. Government.
